# Supplementary material for: Genomic and phenotypic analyses reveal Paenibacillus polymyxa PJH16 is a potential biocontrol agent against cucumber fusarium wilt
Source: Front Microbiol. 2024 Mar 25;15:1359263. doi: 10.3389/fmicb.2024.1359263 (PMC11000672; doi:10.3389/fmicb.2024.1359263)
Supplement: Supplementary file 2 [file Table_2.XLSX]

## Sheet: Sheet1
Table S2. The impact of P. polymyxa PJH16 on growth parameters of cucumber seedlings.
	Treatment	CK	Foc	Foc＋0.1% Hymexazol	Foc＋PJH16	PJH16
20 dpi	Shoot height (cm)	5.85±0.42c	4.26±0.29d	5.87±0.24c	6.56±0.26b	7.06±0.22a
	Stem thickness (cm)	0.3±0.01c	0.21±0.02d	0.33±0.02b	0.35±0.03ab	0.37±0.02a
	Root length (cm)	13.75±2.32b	4.99±0.52c	13.58±1.35b	14.81±0.96ab	16±1.22a
	Leaf area 1 (cm2)	20.93±0.6c	15.17±0.53d	23.77±0.67c	39.1±2.24b	48.05±5.16a
	Leaf area 2 (cm2)	2.36±1.08c	0.47±0.13d	4.2±0.41c	7.92±1.5b	14.21±3.3a
	Chlorophyll content (SPAD)	45.77±1.67d	33.98±2.28e	50.36±1.42c	59.3±0.71b	61.71±2.85a
	Shoot fresh weight (g)	1.31±0.11c	0.56±0.06d	1.91±0.31b	2.14±0.12b	2.48±0.29a
	Root fresh weight (g)	0.74±0.09b	0.25±0.03c	0.87±0.07ab	0.88±0.22ab	0.98±0.1a
	Shoot dry weight (g)	0.16±0.01b	0.07±0.01c	0.18±0.02b	0.21±0.03a	0.22±0.04a
	Root dry weight (g)	0.04±0.01c	0.01±0.01d	0.04±0.01c	0.05±0.01b	0.06±0.01a
	Socioeconomic mobility index	0.05±0.01b	0.02±0.01c	0.05±0.01b	0.06±0.01b	0.09±0.01a
40 dpi	Shoot height (cm)	23.78±1.81b	9.36±0.27d	15.92±0.34c	27.23±0.33a	28.29±0.69a
	Stem thickness (cm)	0.46±0.02abc	0.42±0.05c	0.45±0.03bc	0.49±0.03ab	0.5±0.02a
	Root length (cm)	22.26±2.26b	15.65±0.2d	18.49±0.36c	23.63±1.12ab	25.61±2.82a
	Leaf area 1 (cm2)	41.56±3.43b	23.54±0.31c	38.63±0.55b	68.5±1.69a	69.63±4.1a
	Leaf area 2 (cm2)	59.33±7.18c	25.51±0.39e	42.83±0.5d	78.01±1.71b	85.1±6.36a
	Leaf area 3 (cm2)	88.08±11.51c	10.45±0.29e	68.43±0.32d	101.62±3.73b	117.08±21.26a
	Leaf area 4 (cm2)	/	/	/	56.6±1.42b	90.75±12.47a
	Chlorophyll content (SPAD)	32.53±5.57c	10.35±0.22d	30.66±0.37c	37.65±1.12b	44.49±1.93a
	Shoot fresh weight (g)	6.43±0.88d	4.44±0.17e	7.94±0.47c	9.72±0.05b	11.94±1.6a
	Root fresh weight (g)	1.27±0.33b	0.49±0.19c	1.29±0.22b	1.86±0.1a	1.99±0.41a
	Shoot dry weight (g)	0.37±0.03c	0.15±0.04d	0.32±0.03c	0.52±0.02b	0.71±0.08a
	Root dry weight (g)	0.06±0.01c	0.02±0.01d	0.05±0.01c	0.08±0.01b	0.09±0a
	Socioeconomic mobility index	0.07±0.02c	0.02±0.01d	0.06±0.01c	0.1±0.01b	0.11±0.02a
