# Supplementary material for: Genomic and phenotypic analyses reveal Paenibacillus polymyxa PJH16 is a potential biocontrol agent against cucumber fusarium wilt
Source: Front Microbiol. 2024 Mar 25;15:1359263. doi: 10.3389/fmicb.2024.1359263 (PMC11000672; doi:10.3389/fmicb.2024.1359263)
Supplement: Supplementary file 8 [file Table_8.xlsx]

## Sheet: VFDB_anno
Table S8. Annotation results of genes in the chromosome of PJH16 strain in the VFDB database
Query_ID	Query_length	Subject_ID	Subject_length	Identity	E_value	Verification	VFID	VFname	Species	Related_genes	Description	VF_Hyperlink
orf00035	465	VFG047256(gb|YP_169432.1)	455	169/459(36.82)	2.35e-85	experimentally verified	VF0542	LPS	Francisella tularensis subsp. tularensis SCHU S4	glmU	UDP-N-acetylglucosamine pyrophosphorylase/glucosamine-1-phosphate N-acetyltransferase	http://www.mgc.ac.cn/cgi-bin/VFs/vfs.cgi?VFID=VF0542#VF0542
orf00041	372	VFG032878(gb|NP_465743)	293	90/318(28.30)	1.38e-15	experimentally verified	VF0449	PrsA2	Listeria monocytogenes EGD-e	prsA2	post translocation chaperone PrsA2	http://www.mgc.ac.cn/cgi-bin/VFs/vfs.cgi?VFID=VF0449#VF0449
orf00053	312	VFG002060(gb|NP_248764)	1032	52/201(25.87)	2.25e-08	experimentally verified	VF0334	HSI-I	Pseudomonas aeruginosa PAO1	ppkA	serine/threonine protein kinase PpkA	http://www.mgc.ac.cn/cgi-bin/VFs/vfs.cgi?VFID=VF0334#VF0334
orf00064	540	VFG044235(gb|YP_856993)	397	82/265(30.94)	4.59e-30	experimentally verified	IA020	amonabactin	Aeromonas hydrophila subsp. hydrophila ATCC 7966	amoA	isochorismate synthases	None
orf00065	191	VFG047726(gb|YP_170570.1)	388	51/173(29.48)	6.68e-15	experimentally verified	VF0558	Pyrimidine biosynthesis	Francisella tularensis subsp. tularensis SCHU S4	carA	carbamoyl phosphate synthase small subunit	http://www.mgc.ac.cn/cgi-bin/VFs/vfs.cgi?VFID=VF0558#VF0558
orf00076	256	VFG038839(gb|YP_858598)	249	75/264(28.41)	4.92e-12	experimentally verified	CVF786	Polar flagella	Aeromonas hydrophila subsp. hydrophila ATCC 7966	flmH	short chain dehydrogenase/reductase family oxidoreductase	None
orf00077	486	VFG000161(gb|NP_251089)	2448	134/502(26.69)	2.51e-24	experimentally verified	VF0094	Pyoverdine	Pseudomonas aeruginosa PAO1	pvdD	pyoverdine synthetase D	http://www.mgc.ac.cn/cgi-bin/VFs/vfs.cgi?VFID=VF0094#VF0094
orf00080	414	VFG005788(gb|NP_687689)	731	114/398(28.64)	6.44e-42	experimentally verified	CVF171	Beta-hemolysin/cytolysin	Streptococcus agalactiae 2603V/R	cylI	putative 3-ketoacyl-ACP synthase CylI	None
orf00081	135	VFG011399(gb|NP_539749)	173	48/126(38.10)	2.22e-18	experimentally verified	CVF383	LPS	Brucella melitensis bv. 1 str. 16M	fabZ	(3R)-hydroxymyristoyl ACP dehydratase	None
orf00083	7909	VFG016041(gb|NP_251092)	5149	2010/5180(38.80)	0	experimentally verified	IA001	pyoverdine	Pseudomonas aeruginosa PAO1	pvdI	peptide synthase	None
orf00087	485	VFG050157(gb|YP_002392929.1)	339	33/84(39.29)	1.23e-06	experimentally verified	VF0239	K1 capsule	Escherichia coli O45:K1:H7 str. S88	kpsF	Polysialic acid capsule expression protein	http://www.mgc.ac.cn/cgi-bin/VFs/vfs.cgi?VFID=VF0239#VF0239
orf00099	717	VFG038759(gb|YP_857329)	344	71/266(26.69)	1.05e-24	experimentally verified	AI144	ND	Aeromonas hydrophila subsp. hydrophila ATCC 7966	fleS/flrB	two-component sensor kinase	None
orf00101	275	VFG014720(gb|NP_250152)	296	77/259(29.73)	1.51e-30	experimentally verified	AI138	Deoxyhexose linking sugar, 209 Da capping structure	Pseudomonas aeruginosa PAO1	motD	flagellar motor protein	None
orf00102	264	VFG014707(gb|NP_250151)	246	85/247(34.41)	7.74e-40	experimentally verified	AI138	Deoxyhexose linking sugar, 209 Da capping structure	Pseudomonas aeruginosa PAO1	motC	flagellar motor protein	None
orf00106	166	VFG000070(gb|NP_464110)	482	46/115(40.00)	1.09e-19	experimentally verified	VF0068	p60	Listeria monocytogenes EGD-e	iap/cwhA	P60 extracellular protein, invasion associated protein Iap	http://www.mgc.ac.cn/cgi-bin/VFs/vfs.cgi?VFID=VF0068#VF0068
orf00121	579	VFG013248(gb|NP_438233)	587	191/579(32.99)	9.1e-93	experimentally verified	CVF494	LOS	Haemophilus influenzae Rd KW20	msbA	lipid transporter ATP-binding/permease	None
orf00122	586	VFG013248(gb|NP_438233)	587	157/572(27.45)	3.2e-70	experimentally verified	CVF494	LOS	Haemophilus influenzae Rd KW20	msbA	lipid transporter ATP-binding/permease	None
orf00123	296	VFG044083(gb|NP_250948)	312	33/95(34.74)	7.32e-11	experimentally verified	IA001	pyoverdine	Pseudomonas aeruginosa PAO1	ptxR	transcriptional regulator PtxR	None
orf00127	292	VFG049114(gb|YP_002918199.1)	307	65/269(24.16)	9.25e-11	experimentally verified	VF0572	Allantion utilization	Klebsiella pneumoniae subsp. pneumoniae NTUH-K2044	allS	DNA-binding transcriptional activator AllS	http://www.mgc.ac.cn/cgi-bin/VFs/vfs.cgi?VFID=VF0572#VF0572
orf00128	332	VFG000344(gb|NP_438273)	351	105/250(42.00)	4.92e-63	experimentally verified	VF0268	HitABC	Haemophilus influenzae Rd KW20	hitC	iron(III) ABC transporter, ATP-binding protein	http://www.mgc.ac.cn/cgi-bin/VFs/vfs.cgi?VFID=VF0268#VF0268
orf00129	356	VFG001205(gb|NP_273677)	331	54/269(20.07)	4.05e-06	experimentally verified	VF0272	FbpABC	Neisseria meningitidis MC58	fbpA	iron(III) ABC transporter, periplasmic binding protein	http://www.mgc.ac.cn/cgi-bin/VFs/vfs.cgi?VFID=VF0272#VF0272
orf00130	556	VFG000249(gb|NP_273676)	505	131/531(24.67)	5.59e-25	experimentally verified	VF0272	FbpABC	Neisseria meningitidis MC58	fbpB	iron(III) ABC transporter, permease protein	http://www.mgc.ac.cn/cgi-bin/VFs/vfs.cgi?VFID=VF0272#VF0272
orf00132	386	VFG002177(gb|AAM75253)	412	66/210(31.43)	2.38e-17	experimentally verified	VF0356	Cytolysin	Enterococcus faecalis str. MMH594	cylA	cytolysin activator	http://www.mgc.ac.cn/cgi-bin/VFs/vfs.cgi?VFID=VF0356#VF0356
orf00135	122	VFG001214(gb|NP_253237)	445	47/120(39.17)	5.45e-22	experimentally verified	VF0082	Type IV pili	Pseudomonas aeruginosa PAO1	pilR	two-component response regulator PilR	http://www.mgc.ac.cn/cgi-bin/VFs/vfs.cgi?VFID=VF0082#VF0082
orf00139	445	VFG000390(gb|NP_395174)	439	84/272(30.88)	7.6e-16	experimentally verified	VF0140	TTSS	Yersinia pestis CO92	yscN	type III secretion system ATPase YscN	http://www.mgc.ac.cn/cgi-bin/VFs/vfs.cgi?VFID=VF0140#VF0140
orf00150	374	VFG001206(gb|NP_273675)	352	117/359(32.59)	5.96e-51	experimentally verified	VF0272	FbpABC	Neisseria meningitidis MC58	fbpC	iron(III) ABC transporter, ATP-binding protein	http://www.mgc.ac.cn/cgi-bin/VFs/vfs.cgi?VFID=VF0272#VF0272
orf00175	198	VFG000077(gb|NP_465991)	198	134/194(69.07)	1.52e-97	experimentally verified	VF0074	ClpP	Listeria monocytogenes EGD-e	clpP	ATP-dependent Clp protease proteolytic subunit	http://www.mgc.ac.cn/cgi-bin/VFs/vfs.cgi?VFID=VF0074#VF0074
orf00197	382	VFG001342(gb|NP_688174)	327	37/105(35.24)	3.28e-12	experimentally verified	VF0274	Capsule	Streptococcus agalactiae 2603V/R	cpsO	glycosyl transferase CpsO(V)	http://www.mgc.ac.cn/cgi-bin/VFs/vfs.cgi?VFID=VF0274#VF0274
orf00208	292	VFG000208(gb|NP_250404)	278	29/103(28.16)	6.3e-10	experimentally verified	VF0083	TTSS	Pseudomonas aeruginosa PAO1	exsA	type III secretion system regulatory protein ExsA	http://www.mgc.ac.cn/cgi-bin/VFs/vfs.cgi?VFID=VF0083#VF0083
orf00211	456	VFG049159(gb|YP_006635485.1)	479	67/300(22.33)	7.51e-10	experimentally verified	VF0573	Colibactin	Klebsiella pneumoniae subsp. pneumoniae 1084	clbM	precolibactin export MATE transporter ClbM	http://www.mgc.ac.cn/cgi-bin/VFs/vfs.cgi?VFID=VF0573#VF0573
orf00212	329	VFG002548(gb|YP_109384)	2546	92/317(29.02)	2.73e-22	experimentally verified	VF0436	Capsule I	Burkholderia pseudomallei K96243	wcbR	capsular polysaccharide biosynthesis fatty acid synthase	http://www.mgc.ac.cn/cgi-bin/VFs/vfs.cgi?VFID=VF0436#VF0436
orf00213	288	VFG044083(gb|NP_250948)	312	46/167(27.54)	1.68e-13	experimentally verified	IA001	pyoverdine	Pseudomonas aeruginosa PAO1	ptxR	transcriptional regulator PtxR	None
orf00216	297	VFG007177(gb|NP_798078)	286	30/105(28.57)	1.25e-09	experimentally verified	VF0408	T3SS1	Vibrio parahaemolyticus RIMD 2210633	exsA	transcriptional regulator ExsA	http://www.mgc.ac.cn/cgi-bin/VFs/vfs.cgi?VFID=VF0408#VF0408
orf00223	604	VFG000120(gb|NP_253949)	358	46/198(23.23)	2.12e-11	experimentally verified	VF0091	Alginate	Pseudomonas aeruginosa PAO1	algZ	sigma factor AlgU	http://www.mgc.ac.cn/cgi-bin/VFs/vfs.cgi?VFID=VF0091#VF0091
orf00224	521	VFG000119(gb|NP_253948)	248	43/121(35.54)	2.5e-13	experimentally verified	VF0091	Alginate	Pseudomonas aeruginosa PAO1	algR	alginate biosynthesis regulatory protein AlgR	http://www.mgc.ac.cn/cgi-bin/VFs/vfs.cgi?VFID=VF0091#VF0091
orf00226	173	VFG049164(gb|YP_006635490.1)	108	35/110(31.82)	1.03e-14	experimentally verified	VF0573	Colibactin	Klebsiella pneumoniae subsp. pneumoniae 1084	clbS	colibactin self-protection protein ClbS	http://www.mgc.ac.cn/cgi-bin/VFs/vfs.cgi?VFID=VF0573#VF0573
orf00237	335	VFG002197(gb|NP_814691)	336	130/332(39.16)	1.2e-73	experimentally verified	VF0362	BopD	Enterococcus faecalis V583	bopD	sugar-binding transcriptional regulator, LacI family	http://www.mgc.ac.cn/cgi-bin/VFs/vfs.cgi?VFID=VF0362#VF0362
orf00240	399	VFG044198(gb|YP_169104)	420	88/360(24.44)	1.98e-07	experimentally verified	VF0551	Rhizoferrin	Francisella tularensis subsp. tularensis SCHU S4	fslB	MFS transporter, inner membrane protein responsible for uptake of the ferric-siderophore complex	http://www.mgc.ac.cn/cgi-bin/VFs/vfs.cgi?VFID=VF0551#VF0551
orf00244	309	VFG001231(gb|NP_249104)	2472	34/116(29.31)	5.27e-06	experimentally verified	VF0082	Type IV pili	Pseudomonas aeruginosa PAO1	chpA	still frameshift probable component of chemotactic signal transduction system	http://www.mgc.ac.cn/cgi-bin/VFs/vfs.cgi?VFID=VF0082#VF0082
orf00245	434	VFG007490(gb|NP_231767)	351	34/116(29.31)	3.63e-09	experimentally verified	VF0519	Flagella	Vibrio cholerae O1 biovar El Tor str. N16961	fleS/flrB	sensory box sensor histidine kinase	http://www.mgc.ac.cn/cgi-bin/VFs/vfs.cgi?VFID=VF0519#VF0519
orf00247	503	VFG000088(gb|NP_230473)	620	57/161(35.40)	3.05e-17	experimentally verified	VF0126	TCP	Vibrio cholerae O1 biovar El Tor str. N16961	tcpI	negative regulator of the major pilin TcpA	http://www.mgc.ac.cn/cgi-bin/VFs/vfs.cgi?VFID=VF0126#VF0126
orf00252	357	VFG000344(gb|NP_438273)	351	74/254(29.13)	6.81e-20	experimentally verified	VF0268	HitABC	Haemophilus influenzae Rd KW20	hitC	iron(III) ABC transporter, ATP-binding protein	http://www.mgc.ac.cn/cgi-bin/VFs/vfs.cgi?VFID=VF0268#VF0268
orf00253	321	VFG001206(gb|NP_273675)	352	76/227(33.48)	1.62e-29	experimentally verified	VF0272	FbpABC	Neisseria meningitidis MC58	fbpC	iron(III) ABC transporter, ATP-binding protein	http://www.mgc.ac.cn/cgi-bin/VFs/vfs.cgi?VFID=VF0272#VF0272
orf00269	278	VFG002438(gb|YP_111526)	353	35/112(31.25)	1.08e-07	experimentally verified	VF0428	Bsa T3SS	Burkholderia pseudomallei K96243	bprC	AraC family transcriptional regulator, regulates basal T6SS1 expression	http://www.mgc.ac.cn/cgi-bin/VFs/vfs.cgi?VFID=VF0428#VF0428
orf00272	338	VFG002548(gb|YP_109384)	2546	56/222(25.23)	1.77e-08	experimentally verified	VF0436	Capsule I	Burkholderia pseudomallei K96243	wcbR	capsular polysaccharide biosynthesis fatty acid synthase	http://www.mgc.ac.cn/cgi-bin/VFs/vfs.cgi?VFID=VF0436#VF0436
orf00274	398	VFG044196(gb|YP_169102)	396	55/252(21.83)	1.36e-06	experimentally verified	VF0551	Rhizoferrin	Francisella tularensis subsp. tularensis SCHU S4	fslD	MFS transporter, inner membrane protein responsible for uptake of the ferric-siderophore complex	http://www.mgc.ac.cn/cgi-bin/VFs/vfs.cgi?VFID=VF0551#VF0551
orf00276	340	VFG002197(gb|NP_814691)	336	96/346(27.75)	3.28e-27	experimentally verified	VF0362	BopD	Enterococcus faecalis V583	bopD	sugar-binding transcriptional regulator, LacI family	http://www.mgc.ac.cn/cgi-bin/VFs/vfs.cgi?VFID=VF0362#VF0362
orf00296	237	VFG001206(gb|NP_273675)	352	61/225(27.11)	6.3e-21	experimentally verified	VF0272	FbpABC	Neisseria meningitidis MC58	fbpC	iron(III) ABC transporter, ATP-binding protein	http://www.mgc.ac.cn/cgi-bin/VFs/vfs.cgi?VFID=VF0272#VF0272
orf00301	334	VFG002197(gb|NP_814691)	336	84/341(24.63)	2.61e-21	experimentally verified	VF0362	BopD	Enterococcus faecalis V583	bopD	sugar-binding transcriptional regulator, LacI family	http://www.mgc.ac.cn/cgi-bin/VFs/vfs.cgi?VFID=VF0362#VF0362
orf00310	580	VFG013248(gb|NP_438233)	587	143/572(25.00)	7.99e-52	experimentally verified	CVF494	LOS	Haemophilus influenzae Rd KW20	msbA	lipid transporter ATP-binding/permease	None
orf00316	527	VFG002177(gb|AAM75253)	412	39/141(27.66)	7.56e-08	experimentally verified	VF0356	Cytolysin	Enterococcus faecalis str. MMH594	cylA	cytolysin activator	http://www.mgc.ac.cn/cgi-bin/VFs/vfs.cgi?VFID=VF0356#VF0356
orf00322	293	VFG050186(gb|AJI07989.1)	295	174/290(60.00)	6.6e-120	experimentally verified	CVF891	B. cereus exo-polysaccharide (BPS)	Bacillus cereus G9241	bpsC	UTP--glucose-1-phosphate uridylyltransferase	None
orf00324	363	VFG000670(gb|NP_706258)	309	122/308(39.61)	5.85e-75	experimentally verified	VF0124	LPS	Shigella flexneri 2a str. 301	gtrB	bactoprenol glucosyl transferase	http://www.mgc.ac.cn/cgi-bin/VFs/vfs.cgi?VFID=VF0124#VF0124
orf00325	780	VFG046921(gb|YP_169493.1)	587	48/175(27.43)	6.85e-13	experimentally verified	VF0542	LPS	Francisella tularensis subsp. tularensis SCHU S4	flmK	glycosyltransferase family 39 protein	http://www.mgc.ac.cn/cgi-bin/VFs/vfs.cgi?VFID=VF0542#VF0542
orf00326	229	VFG001386(gb|NP_215271)	247	99/227(43.61)	2.89e-63	experimentally verified	VF0286	PhoP	Mycobacterium tuberculosis H37Rv	phoP	Possible two component system response transcriptional positive regulator PhoP	http://www.mgc.ac.cn/cgi-bin/VFs/vfs.cgi?VFID=VF0286#VF0286
orf00327	498	VFG009810(gb|NP_215272)	485	121/293(41.30)	9.4e-56	experimentally verified	CVF331	PhoP/R	Mycobacterium tuberculosis H37Rv	phoR	Possible two component system response sensor kinase membrane associated PhoR	None
orf00328	1430	VFG000974(gb|NP_269970)	1181	153/543(28.18)	3.24e-29	experimentally verified	VF0245	C5a peptidase	Streptococcus pyogenes M1 GAS	scpA	C5a peptidase precursor	http://www.mgc.ac.cn/cgi-bin/VFs/vfs.cgi?VFID=VF0245#VF0245
orf00330	307	VFG047546(gb|YP_169934.1)	306	56/206(27.18)	7.84e-21	experimentally verified	VF0552	Biotin synthesis	Francisella tularensis subsp. tularensis SCHU S4	bioJ	lipase/esterase	http://www.mgc.ac.cn/cgi-bin/VFs/vfs.cgi?VFID=VF0552#VF0552
orf00331	183	VFG001713(gb|NP_755457)	183	27/100(27.00)	2.67e-08	experimentally verified	CVF425	P fimbriae	Escherichia coli CFT073	papX	PapX protein regulates flagellum synthesis to repress motility	None
orf00339	608	VFG002278(gb|NP_561797)	1297	135/378(35.71)	4.73e-64	experimentally verified	VF0389	mu-toxin	Clostridium perfringens str. 13	nagI	hyaluronidase	http://www.mgc.ac.cn/cgi-bin/VFs/vfs.cgi?VFID=VF0389#VF0389
orf00347	217	VFG002440(gb|YP_111528)	223	75/212(35.38)	5.73e-29	experimentally verified	VF0428	Bsa T3SS	Burkholderia pseudomallei K96243	bprB	two-component response regulator	http://www.mgc.ac.cn/cgi-bin/VFs/vfs.cgi?VFID=VF0428#VF0428
orf00357	598	VFG000120(gb|NP_253949)	358	66/203(32.51)	3.5e-17	experimentally verified	VF0091	Alginate	Pseudomonas aeruginosa PAO1	algZ	sigma factor AlgU	http://www.mgc.ac.cn/cgi-bin/VFs/vfs.cgi?VFID=VF0091#VF0091
orf00358	394	VFG000119(gb|NP_253948)	248	74/249(29.72)	1.9e-14	experimentally verified	VF0091	Alginate	Pseudomonas aeruginosa PAO1	algR	alginate biosynthesis regulatory protein AlgR	http://www.mgc.ac.cn/cgi-bin/VFs/vfs.cgi?VFID=VF0091#VF0091
orf00360	301	VFG044083(gb|NP_250948)	312	45/168(26.79)	7.87e-14	experimentally verified	IA001	pyoverdine	Pseudomonas aeruginosa PAO1	ptxR	transcriptional regulator PtxR	None
orf00364	386	VFG049162(gb|YP_006635488.1)	501	58/220(26.36)	5.68e-11	experimentally verified	VF0573	Colibactin	Klebsiella pneumoniae subsp. pneumoniae 1084	clbP	precolibactin peptidase ClbP	http://www.mgc.ac.cn/cgi-bin/VFs/vfs.cgi?VFID=VF0573#VF0573
orf00365	778	VFG049918(gb|NP_798146.1)	736	77/277(27.80)	1.06e-12	experimentally verified	VF0578	VpadF	Vibrio parahaemolyticus RIMD 2210633	vpadF	surface adhesin VpadF	http://www.mgc.ac.cn/cgi-bin/VFs/vfs.cgi?VFID=VF0578#VF0578
orf00370	349	VFG001206(gb|NP_273675)	352	79/245(32.24)	5.19e-28	experimentally verified	VF0272	FbpABC	Neisseria meningitidis MC58	fbpC	iron(III) ABC transporter, ATP-binding protein	http://www.mgc.ac.cn/cgi-bin/VFs/vfs.cgi?VFID=VF0272#VF0272
orf00371	308	VFG001206(gb|NP_273675)	352	76/232(32.76)	3.33e-33	experimentally verified	VF0272	FbpABC	Neisseria meningitidis MC58	fbpC	iron(III) ABC transporter, ATP-binding protein	http://www.mgc.ac.cn/cgi-bin/VFs/vfs.cgi?VFID=VF0272#VF0272
orf00375	319	VFG044083(gb|NP_250948)	312	82/297(27.61)	1.03e-20	experimentally verified	IA001	pyoverdine	Pseudomonas aeruginosa PAO1	ptxR	transcriptional regulator PtxR	None
orf00378	276	VFG001983(gb|NP_282073)	259	90/240(37.50)	8.3e-43	experimentally verified	VF0327	PEB1	Campylobacter jejuni subsp. jejuni NCTC 11168	pebA	bifunctional adhesin/ABC transporter aspartate/glutamate-binding protein	http://www.mgc.ac.cn/cgi-bin/VFs/vfs.cgi?VFID=VF0327#VF0327
orf00379	245	VFG001206(gb|NP_273675)	352	87/244(35.66)	5.11e-44	experimentally verified	VF0272	FbpABC	Neisseria meningitidis MC58	fbpC	iron(III) ABC transporter, ATP-binding protein	http://www.mgc.ac.cn/cgi-bin/VFs/vfs.cgi?VFID=VF0272#VF0272
orf00381	221	VFG013685(gb|NP_940532)	318	57/216(26.39)	4.92e-18	experimentally verified	AI131	SpaH-type pili	Corynebacterium diphtheriae NCTC 13129	srtD	fimbrial associated sortase	None
orf00382	1182	VFG043508(gb|NP_813892)	1987	265/960(27.60)	1.48e-93	experimentally verified	AI271	Fibrinogen binding protein	Enterococcus faecalis V583	fss1	Enterococcus faecalis surface protein Fss1, fibrinogen binding protein	None
orf00383	293	VFG001234(gb|NP_249107)	264	53/245(21.63)	2.05e-08	experimentally verified	VF0082	Type IV pili	Pseudomonas aeruginosa PAO1	chpD	probable transcriptional regulator	http://www.mgc.ac.cn/cgi-bin/VFs/vfs.cgi?VFID=VF0082#VF0082
orf00397	409	VFG044196(gb|YP_169102)	396	101/363(27.82)	1.9e-31	experimentally verified	VF0551	Rhizoferrin	Francisella tularensis subsp. tularensis SCHU S4	fslD	MFS transporter, inner membrane protein responsible for uptake of the ferric-siderophore complex	http://www.mgc.ac.cn/cgi-bin/VFs/vfs.cgi?VFID=VF0551#VF0551
orf00400	818	VFG000574(gb|NP_462662)	908	133/603(22.06)	1.7e-17	experimentally verified	VF0106	MgtBC	Salmonella enterica subsp. enterica serovar Typhimurium str. LT2	mgtB	Mg2+ transport protein	http://www.mgc.ac.cn/cgi-bin/VFs/vfs.cgi?VFID=VF0106#VF0106
orf00403	317	VFG001206(gb|NP_273675)	352	82/217(37.79)	7.47e-37	experimentally verified	VF0272	FbpABC	Neisseria meningitidis MC58	fbpC	iron(III) ABC transporter, ATP-binding protein	http://www.mgc.ac.cn/cgi-bin/VFs/vfs.cgi?VFID=VF0272#VF0272
orf00410	700	VFG002420(gb|NP_644838)	772	71/248(28.63)	1.49e-17	experimentally verified	VF0422	AdsA	Staphylococcus aureus subsp. aureus MW2	adsA	Adenosine synthase A	http://www.mgc.ac.cn/cgi-bin/VFs/vfs.cgi?VFID=VF0422#VF0422
orf00411	353	VFG006920(gb|NP_230052)	673	71/322(22.05)	6.36e-08	experimentally verified	VF0515	MSHA pili	Vibrio cholerae O1 biovar El Tor str. N16961	mshH	MSHA biogenesis protein MshH	http://www.mgc.ac.cn/cgi-bin/VFs/vfs.cgi?VFID=VF0515#VF0515
orf00416	265	VFG033025(gb|NP_463944)	466	66/189(34.92)	1.49e-32	experimentally verified	VF0442	PgdA	Listeria monocytogenes EGD-e	pdgA	Peptidoglycan N-deacetylase	http://www.mgc.ac.cn/cgi-bin/VFs/vfs.cgi?VFID=VF0442#VF0442
orf00417	340	VFG005776(gb|NP_687685)	309	77/238(32.35)	1.55e-33	experimentally verified	CVF171	Beta-hemolysin/cytolysin	Streptococcus agalactiae 2603V/R	cylA	ABC (ATP-binding cassette) transporter CylA	None
orf00420	1046	VFG009810(gb|NP_215272)	485	72/222(32.43)	9.69e-22	experimentally verified	CVF331	PhoP/R	Mycobacterium tuberculosis H37Rv	phoR	Possible two component system response sensor kinase membrane associated PhoR	None
orf00421	395	VFG000119(gb|NP_253948)	248	61/229(26.64)	1.68e-15	experimentally verified	VF0091	Alginate	Pseudomonas aeruginosa PAO1	algR	alginate biosynthesis regulatory protein AlgR	http://www.mgc.ac.cn/cgi-bin/VFs/vfs.cgi?VFID=VF0091#VF0091
orf00423	224	VFG038219(gb|YP_001845364)	238	80/222(36.04)	1.41e-36	experimentally verified	VF0463	BfmRS	Acinetobacter baumannii ACICU	bfmR	biofilm-controlling response regulator	http://www.mgc.ac.cn/cgi-bin/VFs/vfs.cgi?VFID=VF0463#VF0463
orf00424	476	VFG009810(gb|NP_215272)	485	59/232(25.43)	8.68e-11	experimentally verified	CVF331	PhoP/R	Mycobacterium tuberculosis H37Rv	phoR	Possible two component system response sensor kinase membrane associated PhoR	None
orf00425	305	VFG050113(gb|YP_002336033.1)	291	80/298(26.85)	1.67e-35	experimentally verified	VF0583	Cereulide	Bacillus cereus AH187	cesC	ABC transporter ATP-binding protein, CesC	http://www.mgc.ac.cn/cgi-bin/VFs/vfs.cgi?VFID=VF0583#VF0583
orf00430	273	VFG002060(gb|NP_248764)	1032	45/183(24.59)	3.03e-13	experimentally verified	VF0334	HSI-I	Pseudomonas aeruginosa PAO1	ppkA	serine/threonine protein kinase PpkA	http://www.mgc.ac.cn/cgi-bin/VFs/vfs.cgi?VFID=VF0334#VF0334
orf00443	336	VFG050189(gb|AJI07938.1)	304	75/204(36.76)	4.91e-32	experimentally verified	CVF891	B. cereus exo-polysaccharide (BPS)	Bacillus cereus G9241	bpsX	LytR family transcriptional regulator	None
orf00444	232	VFG032992(gb|NP_464816)	622	71/148(47.97)	2.22e-39	experimentally verified	VF0441	OatA	Listeria monocytogenes EGD-e	oatA	peptidoglycan O-acetyltransferase	http://www.mgc.ac.cn/cgi-bin/VFs/vfs.cgi?VFID=VF0441#VF0441
orf00445	602	VFG032992(gb|NP_464816)	622	243/616(39.45)	2.17e-152	experimentally verified	VF0441	OatA	Listeria monocytogenes EGD-e	oatA	peptidoglycan O-acetyltransferase	http://www.mgc.ac.cn/cgi-bin/VFs/vfs.cgi?VFID=VF0441#VF0441
orf00447	486	VFG009810(gb|NP_215272)	485	83/278(29.86)	1.29e-24	experimentally verified	CVF331	PhoP/R	Mycobacterium tuberculosis H37Rv	phoR	Possible two component system response sensor kinase membrane associated PhoR	None
orf00455	400	VFG044198(gb|YP_169104)	420	80/373(21.45)	2.14e-09	experimentally verified	VF0551	Rhizoferrin	Francisella tularensis subsp. tularensis SCHU S4	fslB	MFS transporter, inner membrane protein responsible for uptake of the ferric-siderophore complex	http://www.mgc.ac.cn/cgi-bin/VFs/vfs.cgi?VFID=VF0551#VF0551
orf00464	584	VFG043209(gb|YP_001006778)	557	48/148(32.43)	2.15e-12	experimentally verified	AI145	peritrichous flagella	Yersinia enterocolitica subsp. enterocolitica 8081	cheD	methyl-accepting chemotaxis protein CheD	None
orf00470	248	VFG049995(gb|NP_832065.1)	261	79/255(30.98)	1.15e-33	experimentally verified	VF0586	Bacillibactin	Bacillus cereus ATCC 14579	dhbA	2,3-dihydroxybenzoate-2,3-dehydrogenase, DhbA	http://www.mgc.ac.cn/cgi-bin/VFs/vfs.cgi?VFID=VF0586#VF0586
orf00488	188	VFG005767(gb|NP_687682)	240	45/132(34.09)	3.19e-17	experimentally verified	CVF171	Beta-hemolysin/cytolysin	Streptococcus agalactiae 2603V/R	cylG	3-ketoacyl-ACP-reductase CylG	None
orf00519	481	VFG009810(gb|NP_215272)	485	76/254(29.92)	4.73e-19	experimentally verified	CVF331	PhoP/R	Mycobacterium tuberculosis H37Rv	phoR	Possible two component system response sensor kinase membrane associated PhoR	None
orf00522	175	VFG000121(gb|NP_249453)	193	50/177(28.25)	5.59e-17	experimentally verified	VF0091	Alginate	Pseudomonas aeruginosa PAO1	algU	alginate biosynthesis protein AlgZ/FimS	http://www.mgc.ac.cn/cgi-bin/VFs/vfs.cgi?VFID=VF0091#VF0091
orf00529	550	VFG000119(gb|NP_253948)	248	42/120(35.00)	6.06e-14	experimentally verified	VF0091	Alginate	Pseudomonas aeruginosa PAO1	algR	alginate biosynthesis regulatory protein AlgR	http://www.mgc.ac.cn/cgi-bin/VFs/vfs.cgi?VFID=VF0091#VF0091
orf00530	604	VFG000120(gb|NP_253949)	358	50/160(31.25)	3.74e-15	experimentally verified	VF0091	Alginate	Pseudomonas aeruginosa PAO1	algZ	sigma factor AlgU	http://www.mgc.ac.cn/cgi-bin/VFs/vfs.cgi?VFID=VF0091#VF0091
orf00544	489	VFG036956(gb|NP_273368)	508	112/402(27.86)	5.11e-36	experimentally verified	VF0450	FarAB	Neisseria meningitidis MC58	farB	fatty acid efflux system protein FarB	http://www.mgc.ac.cn/cgi-bin/VFs/vfs.cgi?VFID=VF0450#VF0450
orf00551	266	VFG001826(gb|NP_217099)	790	36/122(29.51)	3.18e-08	experimentally verified	VF0287	RelA	Mycobacterium tuberculosis H37Rv	relA	Probable GTP pyrophosphokinase RelA (ATP:GTP 3'-pyrophosphotransferase) (PPGPP synthetase I) ((P)PPGPP synthetase) (GTP diphosphokinase)	http://www.mgc.ac.cn/cgi-bin/VFs/vfs.cgi?VFID=VF0287#VF0287
orf00552	153	VFG018241(gb|NP_230208)	172	62/152(40.79)	3.38e-35	experimentally verified	VF0406	AI-2	Vibrio cholerae O1 biovar El Tor str. N16961	luxS	S-ribosylhomocysteinase	http://www.mgc.ac.cn/cgi-bin/VFs/vfs.cgi?VFID=VF0406#VF0406
orf00553	256	VFG049995(gb|NP_832065.1)	261	87/261(33.33)	3.46e-35	experimentally verified	VF0586	Bacillibactin	Bacillus cereus ATCC 14579	dhbA	2,3-dihydroxybenzoate-2,3-dehydrogenase, DhbA	http://www.mgc.ac.cn/cgi-bin/VFs/vfs.cgi?VFID=VF0586#VF0586
orf00554	293	VFG045346(gb|NP_933683)	269	88/274(32.12)	5e-37	experimentally verified	VF0513	IlpA	Vibrio vulnificus YJ016	IlpA	immunogenic lipoprotein A	http://www.mgc.ac.cn/cgi-bin/VFs/vfs.cgi?VFID=VF0513#VF0513
orf00555	279	VFG000421(gb|NP_395427.1)	307	31/102(30.39)	5.15e-09	experimentally verified	VF0138	F1 antigen	Yersinia pestis CO92	caf1R	F1 operon positive regulatory protein	http://www.mgc.ac.cn/cgi-bin/VFs/vfs.cgi?VFID=VF0138#VF0138
orf00557	593	VFG000120(gb|NP_253949)	358	60/209(28.71)	1.92e-17	experimentally verified	VF0091	Alginate	Pseudomonas aeruginosa PAO1	algZ	sigma factor AlgU	http://www.mgc.ac.cn/cgi-bin/VFs/vfs.cgi?VFID=VF0091#VF0091
orf00558	516	VFG000119(gb|NP_253948)	248	42/115(36.52)	5e-15	experimentally verified	VF0091	Alginate	Pseudomonas aeruginosa PAO1	algR	alginate biosynthesis regulatory protein AlgR	http://www.mgc.ac.cn/cgi-bin/VFs/vfs.cgi?VFID=VF0091#VF0091
orf00564	253	VFG048409(gb|YP_002918380.1)	261	55/191(28.80)	4.53e-11	experimentally verified	VF0562	Ent	Klebsiella pneumoniae subsp. pneumoniae NTUH-K2044	entA	2,3-dihydroxybenzoate-2,3-dehydrogenase	http://www.mgc.ac.cn/cgi-bin/VFs/vfs.cgi?VFID=VF0562#VF0562
orf00588	321	VFG050113(gb|YP_002336033.1)	291	69/210(32.86)	1.37e-24	experimentally verified	VF0583	Cereulide	Bacillus cereus AH187	cesC	ABC transporter ATP-binding protein, CesC	http://www.mgc.ac.cn/cgi-bin/VFs/vfs.cgi?VFID=VF0583#VF0583
orf00589	300	VFG050113(gb|YP_002336033.1)	291	91/305(29.84)	7.91e-35	experimentally verified	VF0583	Cereulide	Bacillus cereus AH187	cesC	ABC transporter ATP-binding protein, CesC	http://www.mgc.ac.cn/cgi-bin/VFs/vfs.cgi?VFID=VF0583#VF0583
orf00596	272	VFG050118(gb|YP_002336038.1)	260	56/261(21.46)	1.64e-13	experimentally verified	VF0583	Cereulide	Bacillus cereus AH187	cesH	hydrolase, alpha/beta superfamily, CesH	http://www.mgc.ac.cn/cgi-bin/VFs/vfs.cgi?VFID=VF0583#VF0583
orf00607	336	VFG002548(gb|YP_109384)	2546	88/341(25.81)	2.65e-24	experimentally verified	VF0436	Capsule I	Burkholderia pseudomallei K96243	wcbR	capsular polysaccharide biosynthesis fatty acid synthase	http://www.mgc.ac.cn/cgi-bin/VFs/vfs.cgi?VFID=VF0436#VF0436
orf00609	244	VFG005767(gb|NP_687682)	240	93/240(38.75)	5.97e-42	experimentally verified	CVF171	Beta-hemolysin/cytolysin	Streptococcus agalactiae 2603V/R	cylG	3-ketoacyl-ACP-reductase CylG	None
orf00612	293	VFG001234(gb|NP_249107)	264	31/96(32.29)	2.36e-10	experimentally verified	VF0082	Type IV pili	Pseudomonas aeruginosa PAO1	chpD	probable transcriptional regulator	http://www.mgc.ac.cn/cgi-bin/VFs/vfs.cgi?VFID=VF0082#VF0082
orf00625	189	VFG001306(gb|NP_644948)	185	45/115(39.13)	6.55e-18	experimentally verified	VF0003	Capsule	Staphylococcus aureus subsp. aureus MW2	cap8J	capsular polysaccharide synthesis enzyme Cap8J	http://www.mgc.ac.cn/cgi-bin/VFs/vfs.cgi?VFID=VF0003#VF0003
orf00639	1296	VFG016355(gb|NP_831113)	760	52/201(25.87)	1.34e-08	experimentally verified	VF0585	IlsA	Bacillus cereus ATCC 14579	ilsA	InternalinNEAT domain-containing leucine-rich repeat protein	http://www.mgc.ac.cn/cgi-bin/VFs/vfs.cgi?VFID=VF0585#VF0585
orf00649	219	VFG038219(gb|YP_001845364)	238	86/222(38.74)	2.88e-50	experimentally verified	VF0463	BfmRS	Acinetobacter baumannii ACICU	bfmR	biofilm-controlling response regulator	http://www.mgc.ac.cn/cgi-bin/VFs/vfs.cgi?VFID=VF0463#VF0463
orf00650	589	VFG009810(gb|NP_215272)	485	83/291(28.52)	6.06e-23	experimentally verified	CVF331	PhoP/R	Mycobacterium tuberculosis H37Rv	phoR	Possible two component system response sensor kinase membrane associated PhoR	None
orf00666	304	VFG007177(gb|NP_798078)	286	29/83(34.94)	1.77e-09	experimentally verified	VF0408	T3SS1	Vibrio parahaemolyticus RIMD 2210633	exsA	transcriptional regulator ExsA	http://www.mgc.ac.cn/cgi-bin/VFs/vfs.cgi?VFID=VF0408#VF0408
orf00669	599	VFG000120(gb|NP_253949)	358	55/196(28.06)	8.91e-14	experimentally verified	VF0091	Alginate	Pseudomonas aeruginosa PAO1	algZ	sigma factor AlgU	http://www.mgc.ac.cn/cgi-bin/VFs/vfs.cgi?VFID=VF0091#VF0091
orf00670	355	VFG000119(gb|NP_253948)	248	44/127(34.65)	2.36e-15	experimentally verified	VF0091	Alginate	Pseudomonas aeruginosa PAO1	algR	alginate biosynthesis regulatory protein AlgR	http://www.mgc.ac.cn/cgi-bin/VFs/vfs.cgi?VFID=VF0091#VF0091
orf00691	264	VFG005767(gb|NP_687682)	240	93/255(36.47)	4.35e-37	experimentally verified	CVF171	Beta-hemolysin/cytolysin	Streptococcus agalactiae 2603V/R	cylG	3-ketoacyl-ACP-reductase CylG	None
orf00705	519	VFG007023(gb|NP_231091)	720	80/251(31.87)	1.4e-20	experimentally verified	CVF263	RTX toxin	Vibrio cholerae O1 biovar El Tor str. N16961	rtxB	RTX toxin transporter RtxB	None
orf00706	504	VFG036956(gb|NP_273368)	508	90/308(29.22)	2.28e-33	experimentally verified	VF0450	FarAB	Neisseria meningitidis MC58	farB	fatty acid efflux system protein FarB	http://www.mgc.ac.cn/cgi-bin/VFs/vfs.cgi?VFID=VF0450#VF0450
orf00724	579	VFG038759(gb|YP_857329)	344	82/291(28.18)	6.49e-30	experimentally verified	AI144	ND	Aeromonas hydrophila subsp. hydrophila ATCC 7966	fleS/flrB	two-component sensor kinase	None
orf00734	204	VFG001867(gb|YP_096960)	196	94/193(48.70)	1.48e-65	experimentally verified	VF0169	SodB	Legionella pneumophila subsp. pneumophila str. Philadelphia 1	sodB	superoxide dismutase	http://www.mgc.ac.cn/cgi-bin/VFs/vfs.cgi?VFID=VF0169#VF0169
orf00744	459	VFG001867(gb|YP_096960)	196	75/182(41.21)	1.54e-38	experimentally verified	VF0169	SodB	Legionella pneumophila subsp. pneumophila str. Philadelphia 1	sodB	superoxide dismutase	http://www.mgc.ac.cn/cgi-bin/VFs/vfs.cgi?VFID=VF0169#VF0169
orf00746	247	VFG049118(gb|YP_002918201.1)	272	67/244(27.46)	2.96e-22	experimentally verified	VF0572	Allantion utilization	Klebsiella pneumoniae subsp. pneumoniae NTUH-K2044	allR	DNA-binding transcriptional repressor AllR	http://www.mgc.ac.cn/cgi-bin/VFs/vfs.cgi?VFID=VF0572#VF0572
orf00759	576	VFG000120(gb|NP_253949)	358	61/201(30.35)	1.31e-18	experimentally verified	VF0091	Alginate	Pseudomonas aeruginosa PAO1	algZ	sigma factor AlgU	http://www.mgc.ac.cn/cgi-bin/VFs/vfs.cgi?VFID=VF0091#VF0091
orf00760	519	VFG000119(gb|NP_253948)	248	40/114(35.09)	1.49e-12	experimentally verified	VF0091	Alginate	Pseudomonas aeruginosa PAO1	algR	alginate biosynthesis regulatory protein AlgR	http://www.mgc.ac.cn/cgi-bin/VFs/vfs.cgi?VFID=VF0091#VF0091
orf00768	439	VFG016046(gb|NP_251103)	469	93/332(28.01)	8.07e-24	experimentally verified	IA001	pyoverdine	Pseudomonas aeruginosa PAO1	pvdH	diaminobutyrate-2-oxoglutarate aminotransferase PvdH	None
orf00769	373	VFG050189(gb|AJI07938.1)	304	95/319(29.78)	2.74e-34	experimentally verified	CVF891	B. cereus exo-polysaccharide (BPS)	Bacillus cereus G9241	bpsX	LytR family transcriptional regulator	None
orf00770	346	VFG050113(gb|YP_002336033.1)	291	77/298(25.84)	1.68e-33	experimentally verified	VF0583	Cereulide	Bacillus cereus AH187	cesC	ABC transporter ATP-binding protein, CesC	http://www.mgc.ac.cn/cgi-bin/VFs/vfs.cgi?VFID=VF0583#VF0583
orf00780	512	VFG047726(gb|YP_170570.1)	388	50/171(29.24)	1.4e-11	experimentally verified	VF0558	Pyrimidine biosynthesis	Francisella tularensis subsp. tularensis SCHU S4	carA	carbamoyl phosphate synthase small subunit	http://www.mgc.ac.cn/cgi-bin/VFs/vfs.cgi?VFID=VF0558#VF0558
orf00782	376	VFG000038(gb|NP_878995)	350	66/278(23.74)	1.15e-11	experimentally verified	VF0033	LPS	Bordetella pertussis Tohama I	bplA	probable oxidoreductase	http://www.mgc.ac.cn/cgi-bin/VFs/vfs.cgi?VFID=VF0033#VF0033
orf00783	281	VFG044083(gb|NP_250948)	312	45/171(26.32)	4.68e-11	experimentally verified	IA001	pyoverdine	Pseudomonas aeruginosa PAO1	ptxR	transcriptional regulator PtxR	None
orf00803	293	VFG047582(gb|YP_169891.1)	770	103/293(35.15)	2.23e-42	experimentally verified	VF0559	Purine biosynthesis	Francisella tularensis subsp. tularensis SCHU S4	purCD	fusion protein PurC/PurD	http://www.mgc.ac.cn/cgi-bin/VFs/vfs.cgi?VFID=VF0559#VF0559
orf00808	346	VFG047564(gb|YP_169890.1)	347	165/339(48.67)	1.4e-105	experimentally verified	VF0559	Purine biosynthesis	Francisella tularensis subsp. tularensis SCHU S4	purM	phosphoribosylaminoimidazole synthetase	http://www.mgc.ac.cn/cgi-bin/VFs/vfs.cgi?VFID=VF0559#VF0559
orf00809	204	VFG002230(gb|NP_540335)	259	35/107(32.71)	3.96e-11	experimentally verified	VF0367	LPS	Brucella melitensis bv. 1 str. 16M	wbkC	GDP-mannose 4,6-dehydratase / GDP-4-amino-4,6-dideoxy-D-mannose formyltransferase	http://www.mgc.ac.cn/cgi-bin/VFs/vfs.cgi?VFID=VF0367#VF0367
orf00811	421	VFG047582(gb|YP_169891.1)	770	163/434(37.56)	1.01e-78	experimentally verified	VF0559	Purine biosynthesis	Francisella tularensis subsp. tularensis SCHU S4	purCD	fusion protein PurC/PurD	http://www.mgc.ac.cn/cgi-bin/VFs/vfs.cgi?VFID=VF0559#VF0559
orf00813	285	VFG001983(gb|NP_282073)	259	66/217(30.41)	1.13e-17	experimentally verified	VF0327	PEB1	Campylobacter jejuni subsp. jejuni NCTC 11168	pebA	bifunctional adhesin/ABC transporter aspartate/glutamate-binding protein	http://www.mgc.ac.cn/cgi-bin/VFs/vfs.cgi?VFID=VF0327#VF0327
orf00815	249	VFG000344(gb|NP_438273)	351	86/246(34.96)	4.46e-37	experimentally verified	VF0268	HitABC	Haemophilus influenzae Rd KW20	hitC	iron(III) ABC transporter, ATP-binding protein	http://www.mgc.ac.cn/cgi-bin/VFs/vfs.cgi?VFID=VF0268#VF0268
orf00817	325	VFG000928(gb|NP_752607)	330	110/303(36.30)	1.92e-50	experimentally verified	VF0228	Enterobactin	Escherichia coli CFT073	fepG	iron-enterobactin ABC transporter permease	http://www.mgc.ac.cn/cgi-bin/VFs/vfs.cgi?VFID=VF0228#VF0228
orf00818	334	VFG048468(gb|YP_002918373.1)	335	122/318(38.36)	1.43e-54	experimentally verified	VF0562	Ent	Klebsiella pneumoniae subsp. pneumoniae NTUH-K2044	fepD	iron-enterobactin transporter membrane protein	http://www.mgc.ac.cn/cgi-bin/VFs/vfs.cgi?VFID=VF0562#VF0562
orf00819	326	VFG037372(gb|YP_001847241)	322	82/313(26.20)	8.46e-20	experimentally verified	VF0467	Acinetobactin	Acinetobacter baumannii ACICU	bauB	ferric siderophore ABC transporter, periplasmic siderophore-binding protein	http://www.mgc.ac.cn/cgi-bin/VFs/vfs.cgi?VFID=VF0467#VF0467
orf00820	242	VFG001214(gb|NP_253237)	445	52/163(31.90)	1.62e-14	experimentally verified	VF0082	Type IV pili	Pseudomonas aeruginosa PAO1	pilR	two-component response regulator PilR	http://www.mgc.ac.cn/cgi-bin/VFs/vfs.cgi?VFID=VF0082#VF0082
orf00821	557	VFG038759(gb|YP_857329)	344	84/363(23.14)	7.01e-09	experimentally verified	AI144	ND	Aeromonas hydrophila subsp. hydrophila ATCC 7966	fleS/flrB	two-component sensor kinase	None
orf00834	361	VFG048468(gb|YP_002918373.1)	335	118/316(37.34)	7.89e-55	experimentally verified	VF0562	Ent	Klebsiella pneumoniae subsp. pneumoniae NTUH-K2044	fepD	iron-enterobactin transporter membrane protein	http://www.mgc.ac.cn/cgi-bin/VFs/vfs.cgi?VFID=VF0562#VF0562
orf00835	341	VFG000928(gb|NP_752607)	330	116/313(37.06)	6.03e-54	experimentally verified	VF0228	Enterobactin	Escherichia coli CFT073	fepG	iron-enterobactin ABC transporter permease	http://www.mgc.ac.cn/cgi-bin/VFs/vfs.cgi?VFID=VF0228#VF0228
orf00836	315	VFG001321(gb|YP_001332078)	292	62/281(22.06)	2.17e-06	experimentally verified	VF0015	Isd	Staphylococcus aureus subsp. aureus str. Newman	isdE	iron-regulated surface determinant protein E	http://www.mgc.ac.cn/cgi-bin/VFs/vfs.cgi?VFID=VF0015#VF0015
orf00847	482	VFG001983(gb|NP_282073)	259	49/168(29.17)	6.22e-08	experimentally verified	VF0327	PEB1	Campylobacter jejuni subsp. jejuni NCTC 11168	pebA	bifunctional adhesin/ABC transporter aspartate/glutamate-binding protein	http://www.mgc.ac.cn/cgi-bin/VFs/vfs.cgi?VFID=VF0327#VF0327
orf00848	242	VFG000344(gb|NP_438273)	351	79/236(33.47)	3.75e-42	experimentally verified	VF0268	HitABC	Haemophilus influenzae Rd KW20	hitC	iron(III) ABC transporter, ATP-binding protein	http://www.mgc.ac.cn/cgi-bin/VFs/vfs.cgi?VFID=VF0268#VF0268
orf00876	254	VFG038839(gb|YP_858598)	249	86/256(33.59)	3.46e-30	experimentally verified	CVF786	Polar flagella	Aeromonas hydrophila subsp. hydrophila ATCC 7966	flmH	short chain dehydrogenase/reductase family oxidoreductase	None
orf00878	346	VFG049148(gb|YP_006635474.1)	2970	67/257(26.07)	4.4e-08	experimentally verified	VF0573	Colibactin	Klebsiella pneumoniae subsp. pneumoniae 1084	clbB	colibactin hybrid non-ribosomal peptide synthetase/type I polyketide synthase ClbB	http://www.mgc.ac.cn/cgi-bin/VFs/vfs.cgi?VFID=VF0573#VF0573
orf00891	199	VFG002440(gb|YP_111528)	223	52/167(31.14)	2.31e-16	experimentally verified	VF0428	Bsa T3SS	Burkholderia pseudomallei K96243	bprB	two-component response regulator	http://www.mgc.ac.cn/cgi-bin/VFs/vfs.cgi?VFID=VF0428#VF0428
orf00894	333	VFG000038(gb|NP_878995)	350	68/304(22.37)	1.17e-10	experimentally verified	VF0033	LPS	Bordetella pertussis Tohama I	bplA	probable oxidoreductase	http://www.mgc.ac.cn/cgi-bin/VFs/vfs.cgi?VFID=VF0033#VF0033
orf00895	341	VFG001206(gb|NP_273675)	352	80/225(35.56)	3.64e-34	experimentally verified	VF0272	FbpABC	Neisseria meningitidis MC58	fbpC	iron(III) ABC transporter, ATP-binding protein	http://www.mgc.ac.cn/cgi-bin/VFs/vfs.cgi?VFID=VF0272#VF0272
orf00897	295	VFG045346(gb|NP_933683)	269	97/268(36.19)	2.19e-44	experimentally verified	VF0513	IlpA	Vibrio vulnificus YJ016	IlpA	immunogenic lipoprotein A	http://www.mgc.ac.cn/cgi-bin/VFs/vfs.cgi?VFID=VF0513#VF0513
orf00908	345	VFG000326(gb|NP_439686)	267	26/84(30.95)	5.35e-07	experimentally verified	VF0044	LOS	Haemophilus influenzae Rd KW20	licA	choline kinase	http://www.mgc.ac.cn/cgi-bin/VFs/vfs.cgi?VFID=VF0044#VF0044
orf00914	313	VFG002177(gb|AAM75253)	412	76/270(28.15)	6.62e-23	experimentally verified	VF0356	Cytolysin	Enterococcus faecalis str. MMH594	cylA	cytolysin activator	http://www.mgc.ac.cn/cgi-bin/VFs/vfs.cgi?VFID=VF0356#VF0356
orf00918	597	VFG013248(gb|NP_438233)	587	150/522(28.74)	2.89e-71	experimentally verified	CVF494	LOS	Haemophilus influenzae Rd KW20	msbA	lipid transporter ATP-binding/permease	None
orf00919	198	VFG002193(gb|NP_815518)	242	53/191(27.75)	2.27e-11	experimentally verified	VF0360	Fsr	Enterococcus faecalis V583	fsrB	agrBfs protein	http://www.mgc.ac.cn/cgi-bin/VFs/vfs.cgi?VFID=VF0360#VF0360
orf00921	442	VFG002192(gb|NP_815517)	447	67/228(29.39)	1.32e-18	experimentally verified	VF0360	Fsr	Enterococcus faecalis V583	fsrC	histidine kinase, putative	http://www.mgc.ac.cn/cgi-bin/VFs/vfs.cgi?VFID=VF0360#VF0360
orf00922	259	VFG002194(gb|NP_815519)	243	77/241(31.95)	4.53e-31	experimentally verified	VF0360	Fsr	Enterococcus faecalis V583	fsrA	response regulator	http://www.mgc.ac.cn/cgi-bin/VFs/vfs.cgi?VFID=VF0360#VF0360
orf00934	494	VFG037046(gb|NP_273632)	251	59/167(35.33)	5.6e-19	experimentally verified	VF0455	MntABC	Neisseria meningitidis MC58	mntA	ABC transporter ATP-binding protein MntA	http://www.mgc.ac.cn/cgi-bin/VFs/vfs.cgi?VFID=VF0455#VF0455
orf00936	241	VFG001206(gb|NP_273675)	352	78/217(35.94)	3.04e-33	experimentally verified	VF0272	FbpABC	Neisseria meningitidis MC58	fbpC	iron(III) ABC transporter, ATP-binding protein	http://www.mgc.ac.cn/cgi-bin/VFs/vfs.cgi?VFID=VF0272#VF0272
orf00938	285	VFG045346(gb|NP_933683)	269	98/282(34.75)	1.92e-46	experimentally verified	VF0513	IlpA	Vibrio vulnificus YJ016	IlpA	immunogenic lipoprotein A	http://www.mgc.ac.cn/cgi-bin/VFs/vfs.cgi?VFID=VF0513#VF0513
orf00942	327	VFG000038(gb|NP_878995)	350	54/261(20.69)	3.59e-10	experimentally verified	VF0033	LPS	Bordetella pertussis Tohama I	bplA	probable oxidoreductase	http://www.mgc.ac.cn/cgi-bin/VFs/vfs.cgi?VFID=VF0033#VF0033
orf00945	222	VFG016355(gb|NP_831113)	760	36/111(32.43)	1.84e-07	experimentally verified	VF0585	IlsA	Bacillus cereus ATCC 14579	ilsA	InternalinNEAT domain-containing leucine-rich repeat protein	http://www.mgc.ac.cn/cgi-bin/VFs/vfs.cgi?VFID=VF0585#VF0585
orf00961	339	VFG040865(gb|YP_028299)	90	31/87(35.63)	3.32e-14	experimentally verified	VF0581	T7SS	Bacillus anthracis str. Sterne	esxB	type VII secretion system protein EsxB	http://www.mgc.ac.cn/cgi-bin/VFs/vfs.cgi?VFID=VF0581#VF0581
orf00962	403	VFG049153(gb|YP_006635479.1)	415	95/296(32.09)	1.22e-41	experimentally verified	VF0573	Colibactin	Klebsiella pneumoniae subsp. pneumoniae 1084	clbG	colibactin biosynthesis acyltransferase ClbG	http://www.mgc.ac.cn/cgi-bin/VFs/vfs.cgi?VFID=VF0573#VF0573
orf00963	5249	VFG016058(gb|NP_251114)	4342	915/2870(31.88)	0	experimentally verified	IA001	pyoverdine	Pseudomonas aeruginosa PAO1	pvdL	peptide synthase PvdL	None
orf00964	2588	VFG016041(gb|NP_251092)	5149	939/2580(36.40)	0	experimentally verified	IA001	pyoverdine	Pseudomonas aeruginosa PAO1	pvdI	peptide synthase	None
orf00965	4180	VFG016041(gb|NP_251092)	5149	1309/3701(35.37)	0	experimentally verified	IA001	pyoverdine	Pseudomonas aeruginosa PAO1	pvdI	peptide synthase	None
orf00969	304	VFG050113(gb|YP_002336033.1)	291	67/209(32.06)	3.82e-29	experimentally verified	VF0583	Cereulide	Bacillus cereus AH187	cesC	ABC transporter ATP-binding protein, CesC	http://www.mgc.ac.cn/cgi-bin/VFs/vfs.cgi?VFID=VF0583#VF0583
orf00970	589	VFG002440(gb|YP_111528)	223	57/190(30.00)	2.02e-18	experimentally verified	VF0428	Bsa T3SS	Burkholderia pseudomallei K96243	bprB	two-component response regulator	http://www.mgc.ac.cn/cgi-bin/VFs/vfs.cgi?VFID=VF0428#VF0428
orf00992	253	VFG001206(gb|NP_273675)	352	82/236(34.75)	1.95e-36	experimentally verified	VF0272	FbpABC	Neisseria meningitidis MC58	fbpC	iron(III) ABC transporter, ATP-binding protein	http://www.mgc.ac.cn/cgi-bin/VFs/vfs.cgi?VFID=VF0272#VF0272
orf00998	150	VFG002548(gb|YP_109384)	2546	51/106(48.11)	1.57e-17	experimentally verified	VF0436	Capsule I	Burkholderia pseudomallei K96243	wcbR	capsular polysaccharide biosynthesis fatty acid synthase	http://www.mgc.ac.cn/cgi-bin/VFs/vfs.cgi?VFID=VF0436#VF0436
orf00999	285	VFG038722(gb|YP_855928)	264	47/173(27.17)	3.15e-17	experimentally verified	CVF786	Polar flagella	Aeromonas hydrophila subsp. hydrophila ATCC 7966	AHA_1389	CobQ/CobB/MinD/ParA family protein	None
orf01002	297	VFG038332(gb|YP_001144282)	271	38/146(26.03)	9.97e-07	experimentally verified	VF0479	T3SS	Aeromonas salmonicida subsp. salmonicida A449	exsA	Type III secretion system transcriptional regulator	http://www.mgc.ac.cn/cgi-bin/VFs/vfs.cgi?VFID=VF0479#VF0479
orf01009	450	VFG049159(gb|YP_006635485.1)	479	76/324(23.46)	2.1e-19	experimentally verified	VF0573	Colibactin	Klebsiella pneumoniae subsp. pneumoniae 1084	clbM	precolibactin export MATE transporter ClbM	http://www.mgc.ac.cn/cgi-bin/VFs/vfs.cgi?VFID=VF0573#VF0573
orf01014	608	VFG000120(gb|NP_253949)	358	50/194(25.77)	6.76e-15	experimentally verified	VF0091	Alginate	Pseudomonas aeruginosa PAO1	algZ	sigma factor AlgU	http://www.mgc.ac.cn/cgi-bin/VFs/vfs.cgi?VFID=VF0091#VF0091
orf01015	406	VFG000119(gb|NP_253948)	248	43/115(37.39)	4.58e-17	experimentally verified	VF0091	Alginate	Pseudomonas aeruginosa PAO1	algR	alginate biosynthesis regulatory protein AlgR	http://www.mgc.ac.cn/cgi-bin/VFs/vfs.cgi?VFID=VF0091#VF0091
orf01016	114	VFG044327(gb|YP_002920247)	319	30/100(30.00)	1.05e-08	experimentally verified	VF0564	Ybt	Klebsiella pneumoniae subsp. pneumoniae NTUH-K2044	ybtA	yersiniabactin transcriptional regulator YbtA	http://www.mgc.ac.cn/cgi-bin/VFs/vfs.cgi?VFID=VF0564#VF0564
orf01035	348	VFG002197(gb|NP_814691)	336	71/330(21.52)	3.02e-15	experimentally verified	VF0362	BopD	Enterococcus faecalis V583	bopD	sugar-binding transcriptional regulator, LacI family	http://www.mgc.ac.cn/cgi-bin/VFs/vfs.cgi?VFID=VF0362#VF0362
orf01041	580	VFG013248(gb|NP_438233)	587	149/541(27.54)	1.12e-63	experimentally verified	CVF494	LOS	Haemophilus influenzae Rd KW20	msbA	lipid transporter ATP-binding/permease	None
orf01042	612	VFG007023(gb|NP_231091)	720	166/538(30.86)	1.86e-82	experimentally verified	CVF263	RTX toxin	Vibrio cholerae O1 biovar El Tor str. N16961	rtxB	RTX toxin transporter RtxB	None
orf01044	399	VFG045330(gb|YP_095353)	386	46/184(25.00)	1.11e-09	experimentally verified	VF0291	Legiobactin	Legionella pneumophila subsp. pneumophila str. Philadelphia 1	lbtC	LbtC inner membrane protein required for import of Legiobactin	http://www.mgc.ac.cn/cgi-bin/VFs/vfs.cgi?VFID=VF0291#VF0291
orf01047	466	VFG036956(gb|NP_273368)	508	42/164(25.61)	1.66e-07	experimentally verified	VF0450	FarAB	Neisseria meningitidis MC58	farB	fatty acid efflux system protein FarB	http://www.mgc.ac.cn/cgi-bin/VFs/vfs.cgi?VFID=VF0450#VF0450
orf01048	446	VFG002440(gb|YP_111528)	223	36/118(30.51)	1.86e-13	experimentally verified	VF0428	Bsa T3SS	Burkholderia pseudomallei K96243	bprB	two-component response regulator	http://www.mgc.ac.cn/cgi-bin/VFs/vfs.cgi?VFID=VF0428#VF0428
orf01049	481	VFG000120(gb|NP_253949)	358	43/117(36.75)	1.04e-15	experimentally verified	VF0091	Alginate	Pseudomonas aeruginosa PAO1	algZ	sigma factor AlgU	http://www.mgc.ac.cn/cgi-bin/VFs/vfs.cgi?VFID=VF0091#VF0091
orf01053	891	VFG038234(gb|YP_001845365)	549	62/221(28.05)	1e-15	experimentally verified	VF0463	BfmRS	Acinetobacter baumannii ACICU	bfmS	signal transduction histidine kinase	http://www.mgc.ac.cn/cgi-bin/VFs/vfs.cgi?VFID=VF0463#VF0463
orf01055	300	VFG050113(gb|YP_002336033.1)	291	78/291(26.80)	2.25e-33	experimentally verified	VF0583	Cereulide	Bacillus cereus AH187	cesC	ABC transporter ATP-binding protein, CesC	http://www.mgc.ac.cn/cgi-bin/VFs/vfs.cgi?VFID=VF0583#VF0583
orf01068	447	VFG038900(gb|YP_857314)	439	95/424(22.41)	1.88e-25	experimentally verified	CVF792	Hemolysin HlyA	Aeromonas hydrophila subsp. hydrophila ATCC 7966	hlyA	Hemolysin A	None
orf01069	424	VFG000104(gb|NP_230488)	626	67/251(26.69)	7.49e-20	experimentally verified	VF0127	ACF	Vibrio cholerae O1 biovar El Tor str. N16961	acfB	accessory colonization factor AcfB, methyl-accepting chemoreceptor	http://www.mgc.ac.cn/cgi-bin/VFs/vfs.cgi?VFID=VF0127#VF0127
orf01073	263	VFG038839(gb|YP_858598)	249	88/263(33.46)	4.78e-28	experimentally verified	CVF786	Polar flagella	Aeromonas hydrophila subsp. hydrophila ATCC 7966	flmH	short chain dehydrogenase/reductase family oxidoreductase	None
orf01075	223	VFG000575(gb|NP_462663)	231	52/129(40.31)	1.82e-26	experimentally verified	VF0106	MgtBC	Salmonella enterica subsp. enterica serovar Typhimurium str. LT2	mgtC	Mg2+ transport protein	http://www.mgc.ac.cn/cgi-bin/VFs/vfs.cgi?VFID=VF0106#VF0106
orf01076	225	VFG041304(gb|YP_095978)	188	73/173(42.20)	3.4e-35	experimentally verified	SS047	Dot/Icm	Legionella pneumophila subsp. pneumophila str. Philadelphia 1	lirB	Dot/Icm type IV secretion system effector LirB	None
orf01079	410	VFG044198(gb|YP_169104)	420	56/169(33.14)	1.88e-20	experimentally verified	VF0551	Rhizoferrin	Francisella tularensis subsp. tularensis SCHU S4	fslB	MFS transporter, inner membrane protein responsible for uptake of the ferric-siderophore complex	http://www.mgc.ac.cn/cgi-bin/VFs/vfs.cgi?VFID=VF0551#VF0551
orf01084	360	VFG011414(gb|NP_539767)	277	72/268(26.87)	2.24e-21	experimentally verified	CVF383	LPS	Brucella melitensis bv. 1 str. 16M	kdsA	2-dehydro-3-deoxyphosphooctonate aldolase	None
orf01088	629	VFG038759(gb|YP_857329)	344	58/233(24.89)	2.99e-19	experimentally verified	AI144	ND	Aeromonas hydrophila subsp. hydrophila ATCC 7966	fleS/flrB	two-component sensor kinase	None
orf01099	666	VFG000120(gb|NP_253949)	358	59/204(28.92)	3.27e-15	experimentally verified	VF0091	Alginate	Pseudomonas aeruginosa PAO1	algZ	sigma factor AlgU	http://www.mgc.ac.cn/cgi-bin/VFs/vfs.cgi?VFID=VF0091#VF0091
orf01100	433	VFG000119(gb|NP_253948)	248	43/115(37.39)	8.22e-16	experimentally verified	VF0091	Alginate	Pseudomonas aeruginosa PAO1	algR	alginate biosynthesis regulatory protein AlgR	http://www.mgc.ac.cn/cgi-bin/VFs/vfs.cgi?VFID=VF0091#VF0091
orf01107	516	VFG001206(gb|NP_273675)	352	62/223(27.80)	2.11e-20	experimentally verified	VF0272	FbpABC	Neisseria meningitidis MC58	fbpC	iron(III) ABC transporter, ATP-binding protein	http://www.mgc.ac.cn/cgi-bin/VFs/vfs.cgi?VFID=VF0272#VF0272
orf01109	301	VFG005767(gb|NP_687682)	240	82/246(33.33)	6.32e-36	experimentally verified	CVF171	Beta-hemolysin/cytolysin	Streptococcus agalactiae 2603V/R	cylG	3-ketoacyl-ACP-reductase CylG	None
orf01117	345	VFG002305(gb|NP_461448)	2039	45/121(37.19)	8.19e-10	experimentally verified	VF0398	ShdA	Salmonella enterica subsp. enterica serovar Typhimurium str. LT2	shdA	AIDA autotransporter-like protein	http://www.mgc.ac.cn/cgi-bin/VFs/vfs.cgi?VFID=VF0398#VF0398
orf01133	635	VFG002420(gb|NP_644838)	772	177/501(35.33)	2.42e-79	experimentally verified	VF0422	AdsA	Staphylococcus aureus subsp. aureus MW2	adsA	Adenosine synthase A	http://www.mgc.ac.cn/cgi-bin/VFs/vfs.cgi?VFID=VF0422#VF0422
orf01159	321	VFG001377(gb|NP_359024)	501	48/203(23.65)	2.5e-07	experimentally verified	VF0145	CBPs	Streptococcus pneumoniae R6	lytC	1,4-beta-N-acetylmuramidase	http://www.mgc.ac.cn/cgi-bin/VFs/vfs.cgi?VFID=VF0145#VF0145
orf01160	1496	VFG050115(gb|YP_002336035.1)	3374	488/1535(31.79)	7.65e-229	experimentally verified	VF0583	Cereulide	Bacillus cereus AH187	cesA	Cereulide synthetase A, CesA	http://www.mgc.ac.cn/cgi-bin/VFs/vfs.cgi?VFID=VF0583#VF0583
orf01161	1036	VFG000160(gb|NP_251087)	549	157/471(33.33)	6.62e-66	experimentally verified	VF0094	Pyoverdine	Pseudomonas aeruginosa PAO1	pvdE	pyoverdine biosynthesis protein PvdE	http://www.mgc.ac.cn/cgi-bin/VFs/vfs.cgi?VFID=VF0094#VF0094
orf01164	468	VFG016041(gb|NP_251092)	5149	151/458(32.97)	1.15e-76	experimentally verified	IA001	pyoverdine	Pseudomonas aeruginosa PAO1	pvdI	peptide synthase	None
orf01166	2542	VFG049148(gb|YP_006635474.1)	2970	414/1335(31.01)	3.17e-151	experimentally verified	VF0573	Colibactin	Klebsiella pneumoniae subsp. pneumoniae 1084	clbB	colibactin hybrid non-ribosomal peptide synthetase/type I polyketide synthase ClbB	http://www.mgc.ac.cn/cgi-bin/VFs/vfs.cgi?VFID=VF0573#VF0573
orf01167	1640	VFG049155(gb|YP_006635481.1)	1010	210/519(40.46)	1.83e-99	experimentally verified	VF0573	Colibactin	Klebsiella pneumoniae subsp. pneumoniae 1084	clbI	colibactin polyketide synthase ClbI	http://www.mgc.ac.cn/cgi-bin/VFs/vfs.cgi?VFID=VF0573#VF0573
orf01168	403	VFG001965(gb|NP_282578)	367	60/272(22.06)	1.85e-08	experimentally verified	VF0323	Capsule	Campylobacter jejuni subsp. jejuni NCTC 11168	Cj1437c	aminotransferase	http://www.mgc.ac.cn/cgi-bin/VFs/vfs.cgi?VFID=VF0323#VF0323
orf01169	674	VFG016058(gb|NP_251114)	4342	235/603(38.97)	1.37e-116	experimentally verified	IA001	pyoverdine	Pseudomonas aeruginosa PAO1	pvdL	peptide synthase PvdL	None
orf01170	1344	VFG049155(gb|YP_006635481.1)	1010	215/534(40.26)	2.86e-103	experimentally verified	VF0573	Colibactin	Klebsiella pneumoniae subsp. pneumoniae 1084	clbI	colibactin polyketide synthase ClbI	http://www.mgc.ac.cn/cgi-bin/VFs/vfs.cgi?VFID=VF0573#VF0573
orf01172	2375	VFG000161(gb|NP_251089)	2448	780/2179(35.80)	0	experimentally verified	VF0094	Pyoverdine	Pseudomonas aeruginosa PAO1	pvdD	pyoverdine synthetase D	http://www.mgc.ac.cn/cgi-bin/VFs/vfs.cgi?VFID=VF0094#VF0094
orf01173	415	VFG049153(gb|YP_006635479.1)	415	108/321(33.64)	2.06e-47	experimentally verified	VF0573	Colibactin	Klebsiella pneumoniae subsp. pneumoniae 1084	clbG	colibactin biosynthesis acyltransferase ClbG	http://www.mgc.ac.cn/cgi-bin/VFs/vfs.cgi?VFID=VF0573#VF0573
orf01174	3771	VFG000161(gb|NP_251089)	2448	729/2177(33.49)	0	experimentally verified	VF0094	Pyoverdine	Pseudomonas aeruginosa PAO1	pvdD	pyoverdine synthetase D	http://www.mgc.ac.cn/cgi-bin/VFs/vfs.cgi?VFID=VF0094#VF0094
orf01175	1289	VFG050114(gb|YP_002336034.1)	2681	397/1178(33.70)	3.47e-209	experimentally verified	VF0583	Cereulide	Bacillus cereus AH187	cesB	Cereulide synthetase B, CesB	http://www.mgc.ac.cn/cgi-bin/VFs/vfs.cgi?VFID=VF0583#VF0583
orf01189	214	VFG002440(gb|YP_111528)	223	69/210(32.86)	7.68e-23	experimentally verified	VF0428	Bsa T3SS	Burkholderia pseudomallei K96243	bprB	two-component response regulator	http://www.mgc.ac.cn/cgi-bin/VFs/vfs.cgi?VFID=VF0428#VF0428
orf01190	247	VFG050188(gb|AJI07978.1)	246	65/214(30.37)	2.36e-26	experimentally verified	CVF891	B. cereus exo-polysaccharide (BPS)	Bacillus cereus G9241	bpsA	capsular biosynthesis protein	None
orf01191	212	VFG050187(gb|AJI07963.1)	222	75/203(36.95)	3.71e-39	experimentally verified	CVF891	B. cereus exo-polysaccharide (BPS)	Bacillus cereus G9241	bpsB	capsular exopolysaccharide family domain protein	None
orf01192	297	VFG050186(gb|AJI07989.1)	295	209/292(71.58)	7.84e-153	experimentally verified	CVF891	B. cereus exo-polysaccharide (BPS)	Bacillus cereus G9241	bpsC	UTP--glucose-1-phosphate uridylyltransferase	None
orf01193	232	VFG050185(gb|AJI07977.1)	205	130/204(63.73)	8.68e-91	experimentally verified	CVF891	B. cereus exo-polysaccharide (BPS)	Bacillus cereus G9241	bpsD	bacterial sugar transferase family protein	None
orf01194	311	VFG013471(gb|NP_439724)	323	34/132(25.76)	3.04e-08	experimentally verified	CVF494	LOS	Haemophilus influenzae Rd KW20	lgtA	N-acetylglucosamine glycosyltransferase	None
orf01199	279	VFG013315(gb|NP_438813)	254	60/231(25.97)	4.26e-25	experimentally verified	CVF494	LOS	Haemophilus influenzae Rd KW20	lgtF	beta-1,4-glucosyltransferase	None
orf01200	395	VFG046955(gb|YP_170193.1)	354	58/221(26.24)	4.95e-15	experimentally verified	VF0542	LPS	Francisella tularensis subsp. tularensis SCHU S4	lpcC	glycosyl transferase family protein	http://www.mgc.ac.cn/cgi-bin/VFs/vfs.cgi?VFID=VF0542#VF0542
orf01201	382	VFG000031(gb|NP_878988)	390	34/140(24.29)	4.17e-08	experimentally verified	VF0033	LPS	Bordetella pertussis Tohama I	bplH	putative glycosyl transferase	http://www.mgc.ac.cn/cgi-bin/VFs/vfs.cgi?VFID=VF0033#VF0033
orf01202	366	VFG046662(gb|YP_169799.1)	409	44/190(23.16)	4.14e-10	experimentally verified	VF0543	Capsule	Francisella tularensis subsp. tularensis SCHU S4	FTT_0792	glycosyl transferase	http://www.mgc.ac.cn/cgi-bin/VFs/vfs.cgi?VFID=VF0543#VF0543
orf01203	442	VFG050178(gb|AAD32399.1)	443	201/432(46.53)	1.36e-141	experimentally verified	CVF890	Hyaluronic acid (HA) capsule	Bacillus anthracis str. Sterne	hasB	UDP-glucose dehydrogenase	None
orf01204	458	VFG002363(gb|YP_001007255)	465	153/478(32.01)	5.01e-54	experimentally verified	VF0392	O-antigen	Yersinia enterocolitica subsp. enterocolitica 8081	manC	mannose-1-phosphate guanylyltransferase	http://www.mgc.ac.cn/cgi-bin/VFs/vfs.cgi?VFID=VF0392#VF0392
orf01205	499	VFG000677(gb|AAD32414)	764	38/144(26.39)	5.03e-10	experimentally verified	VF0142	Anthrax toxin	Bacillus anthracis str. Sterne	pagA	anthrax toxin moiety, protective antigen	http://www.mgc.ac.cn/cgi-bin/VFs/vfs.cgi?VFID=VF0142#VF0142
orf01209	249	VFG050188(gb|AJI07978.1)	246	70/237(29.54)	1.78e-26	experimentally verified	CVF891	B. cereus exo-polysaccharide (BPS)	Bacillus cereus G9241	bpsA	capsular biosynthesis protein	None
orf01210	201	VFG050187(gb|AJI07963.1)	222	77/185(41.62)	4.56e-46	experimentally verified	CVF891	B. cereus exo-polysaccharide (BPS)	Bacillus cereus G9241	bpsB	capsular exopolysaccharide family domain protein	None
orf01211	232	VFG050185(gb|AJI07977.1)	205	121/199(60.80)	1.2e-83	experimentally verified	CVF891	B. cereus exo-polysaccharide (BPS)	Bacillus cereus G9241	bpsD	bacterial sugar transferase family protein	None
orf01212	312	VFG048874(gb|YP_002920357.1)	346	172/313(54.95)	1.22e-122	experimentally verified	VF0560	Capsule	Klebsiella pneumoniae subsp. pneumoniae NTUH-K2044	wcaG	GDP-fucose synthetase	http://www.mgc.ac.cn/cgi-bin/VFs/vfs.cgi?VFID=VF0560#VF0560
orf01213	329	VFG002365(gb|YP_001007257)	372	185/362(51.10)	5.86e-124	experimentally verified	VF0392	O-antigen	Yersinia enterocolitica subsp. enterocolitica 8081	gmd	GDP-mannose 4,6-dehydratase	http://www.mgc.ac.cn/cgi-bin/VFs/vfs.cgi?VFID=VF0392#VF0392
orf01214	447	VFG002372(gb|YP_001007264)	429	112/419(26.73)	5.21e-40	experimentally verified	VF0392	O-antigen	Yersinia enterocolitica subsp. enterocolitica 8081	wzx	O-unit flippase	http://www.mgc.ac.cn/cgi-bin/VFs/vfs.cgi?VFID=VF0392#VF0392
orf01216	405	VFG000428(gb|NP_458735)	578	33/104(31.73)	9.83e-07	experimentally verified	VF0101	Vi antigen	Salmonella enterica subsp. enterica serovar Typhi str. CT18	tviE	Vi polysaccharide biosynthesis protein TviE, Glycosyl transferases group 1	http://www.mgc.ac.cn/cgi-bin/VFs/vfs.cgi?VFID=VF0101#VF0101
orf01217	405	VFG047176(gb|YP_170398.1)	363	44/158(27.85)	1.43e-10	experimentally verified	VF0542	LPS	Francisella tularensis subsp. tularensis SCHU S4	wbtD	galacturonosyl transferase	http://www.mgc.ac.cn/cgi-bin/VFs/vfs.cgi?VFID=VF0542#VF0542
orf01219	446	VFG050178(gb|AAD32399.1)	443	212/434(48.85)	1.27e-140	experimentally verified	CVF890	Hyaluronic acid (HA) capsule	Bacillus anthracis str. Sterne	hasB	UDP-glucose dehydrogenase	None
orf01220	325	VFG050189(gb|AJI07938.1)	304	117/311(37.62)	1.44e-78	experimentally verified	CVF891	B. cereus exo-polysaccharide (BPS)	Bacillus cereus G9241	bpsX	LytR family transcriptional regulator	None
orf01222	306	VFG050113(gb|YP_002336033.1)	291	83/233(35.62)	1.04e-38	experimentally verified	VF0583	Cereulide	Bacillus cereus AH187	cesC	ABC transporter ATP-binding protein, CesC	http://www.mgc.ac.cn/cgi-bin/VFs/vfs.cgi?VFID=VF0583#VF0583
orf01227	476	VFG037203(gb|YP_001847849)	541	90/433(20.79)	6.59e-15	experimentally verified	VF0469	Phospholipase D	Acinetobacter baumannii ACICU	plcD	phosphatidylserine/phosphatidylglycerophosphate/cardiolipin synthase	http://www.mgc.ac.cn/cgi-bin/VFs/vfs.cgi?VFID=VF0469#VF0469
orf01237	620	VFG013248(gb|NP_438233)	587	109/241(45.23)	2.1e-56	experimentally verified	CVF494	LOS	Haemophilus influenzae Rd KW20	msbA	lipid transporter ATP-binding/permease	None
orf01251	171	VFG039386(gb|NP_819821)	145	45/135(33.33)	2.43e-18	experimentally verified	SS051	Dot/Icm	Coxiella burnetii RSA 493	coxH2	Coxiella Dot/Icm type IVB secretion system translocated effector	None
orf01253	664	VFG048488(gb|YP_002918371.1)	264	69/225(30.67)	8.27e-16	experimentally verified	VF0562	Ent	Klebsiella pneumoniae subsp. pneumoniae NTUH-K2044	fepC	iron-enterobactin transporter ATP-binding protein	http://www.mgc.ac.cn/cgi-bin/VFs/vfs.cgi?VFID=VF0562#VF0562
orf01260	542	VFG012095(gb|YP_001086664)	542	378/536(70.52)	3.47e-256	experimentally verified	VF0594	GroEL	Clostridium difficile 630	groEL	chaperonin GroEL	http://www.mgc.ac.cn/cgi-bin/VFs/vfs.cgi?VFID=VF0594#VF0594
orf01265	293	VFG001234(gb|NP_249107)	264	57/254(22.44)	3.71e-08	experimentally verified	VF0082	Type IV pili	Pseudomonas aeruginosa PAO1	chpD	probable transcriptional regulator	http://www.mgc.ac.cn/cgi-bin/VFs/vfs.cgi?VFID=VF0082#VF0082
orf01267	262	VFG033025(gb|NP_463944)	466	86/200(43.00)	5.58e-41	experimentally verified	VF0442	PgdA	Listeria monocytogenes EGD-e	pdgA	Peptidoglycan N-deacetylase	http://www.mgc.ac.cn/cgi-bin/VFs/vfs.cgi?VFID=VF0442#VF0442
orf01274	194	VFG001284(gb|NP_647402)	186	40/151(26.49)	5.26e-10	experimentally verified	VF0014	Intercellular adhesion proteins	Staphylococcus aureus subsp. aureus MW2	icaR	ica operon transcriptional regulator IcaR	http://www.mgc.ac.cn/cgi-bin/VFs/vfs.cgi?VFID=VF0014#VF0014
orf01278	449	VFG001206(gb|NP_273675)	352	96/232(41.38)	3.67e-50	experimentally verified	VF0272	FbpABC	Neisseria meningitidis MC58	fbpC	iron(III) ABC transporter, ATP-binding protein	http://www.mgc.ac.cn/cgi-bin/VFs/vfs.cgi?VFID=VF0272#VF0272
orf01281	676	VFG000104(gb|NP_230488)	626	162/597(27.14)	1.94e-28	experimentally verified	VF0127	ACF	Vibrio cholerae O1 biovar El Tor str. N16961	acfB	accessory colonization factor AcfB, methyl-accepting chemoreceptor	http://www.mgc.ac.cn/cgi-bin/VFs/vfs.cgi?VFID=VF0127#VF0127
orf01284	307	VFG050113(gb|YP_002336033.1)	291	71/226(31.42)	3.95e-31	experimentally verified	VF0583	Cereulide	Bacillus cereus AH187	cesC	ABC transporter ATP-binding protein, CesC	http://www.mgc.ac.cn/cgi-bin/VFs/vfs.cgi?VFID=VF0583#VF0583
orf01285	314	VFG009810(gb|NP_215272)	485	70/230(30.43)	7.6e-25	experimentally verified	CVF331	PhoP/R	Mycobacterium tuberculosis H37Rv	phoR	Possible two component system response sensor kinase membrane associated PhoR	None
orf01286	235	VFG038219(gb|YP_001845364)	238	78/226(34.51)	3.37e-41	experimentally verified	VF0463	BfmRS	Acinetobacter baumannii ACICU	bfmR	biofilm-controlling response regulator	http://www.mgc.ac.cn/cgi-bin/VFs/vfs.cgi?VFID=VF0463#VF0463
orf01289	573	VFG007177(gb|NP_798078)	286	30/90(33.33)	2.09e-11	experimentally verified	VF0408	T3SS1	Vibrio parahaemolyticus RIMD 2210633	exsA	transcriptional regulator ExsA	http://www.mgc.ac.cn/cgi-bin/VFs/vfs.cgi?VFID=VF0408#VF0408
orf01290	323	VFG037372(gb|YP_001847241)	322	70/282(24.82)	2.46e-08	experimentally verified	VF0467	Acinetobactin	Acinetobacter baumannii ACICU	bauB	ferric siderophore ABC transporter, periplasmic siderophore-binding protein	http://www.mgc.ac.cn/cgi-bin/VFs/vfs.cgi?VFID=VF0467#VF0467
orf01313	678	VFG000574(gb|NP_462662)	908	120/533(22.51)	5.1e-15	experimentally verified	VF0106	MgtBC	Salmonella enterica subsp. enterica serovar Typhimurium str. LT2	mgtB	Mg2+ transport protein	http://www.mgc.ac.cn/cgi-bin/VFs/vfs.cgi?VFID=VF0106#VF0106
orf01315	402	VFG036956(gb|NP_273368)	508	48/166(28.92)	8.66e-12	experimentally verified	VF0450	FarAB	Neisseria meningitidis MC58	farB	fatty acid efflux system protein FarB	http://www.mgc.ac.cn/cgi-bin/VFs/vfs.cgi?VFID=VF0450#VF0450
orf01323	323	VFG002165(gb|NP_815739)	308	92/286(32.17)	3.96e-46	experimentally verified	VF0354	EfaA	Enterococcus faecalis V583	efaA	endocarditis specific antigen	http://www.mgc.ac.cn/cgi-bin/VFs/vfs.cgi?VFID=VF0354#VF0354
orf01324	254	VFG037046(gb|NP_273632)	251	82/222(36.94)	4.6e-47	experimentally verified	VF0455	MntABC	Neisseria meningitidis MC58	mntA	ABC transporter ATP-binding protein MntA	http://www.mgc.ac.cn/cgi-bin/VFs/vfs.cgi?VFID=VF0455#VF0455
orf01325	309	VFG037064(gb|NP_273631)	291	83/272(30.51)	1.19e-37	experimentally verified	VF0455	MntABC	Neisseria meningitidis MC58	mntB	Manganese transport system membrane protein MntB	http://www.mgc.ac.cn/cgi-bin/VFs/vfs.cgi?VFID=VF0455#VF0455
orf01326	295	VFG037064(gb|NP_273631)	291	64/215(29.77)	9.23e-20	experimentally verified	VF0455	MntABC	Neisseria meningitidis MC58	mntB	Manganese transport system membrane protein MntB	http://www.mgc.ac.cn/cgi-bin/VFs/vfs.cgi?VFID=VF0455#VF0455
orf01329	415	VFG038532(gb|YP_855994)	437	170/360(47.22)	3.13e-107	experimentally verified	CVF784	Flp type IV pili	Aeromonas hydrophila subsp. hydrophila ATCC 7966	flpF	traffic ATPase	None
orf01330	263	VFG038528(gb|YP_855995)	294	43/187(22.99)	6.51e-06	experimentally verified	CVF784	Flp type IV pili	Aeromonas hydrophila subsp. hydrophila ATCC 7966	flpG	Flp pilus assembly protein FlpG	None
orf01336	170	VFG038316(gb|YP_858310)	290	47/128(36.72)	1.83e-09	experimentally verified	SS209	exe	Aeromonas hydrophila subsp. hydrophila ATCC 7966	tapD/pilD	prepilin peptidase	None
orf01340	299	VFG002230(gb|NP_540335)	259	29/97(29.90)	9.87e-06	experimentally verified	VF0367	LPS	Brucella melitensis bv. 1 str. 16M	wbkC	GDP-mannose 4,6-dehydratase / GDP-4-amino-4,6-dideoxy-D-mannose formyltransferase	http://www.mgc.ac.cn/cgi-bin/VFs/vfs.cgi?VFID=VF0367#VF0367
orf01343	299	VFG048830(gb|YP_002920353.1)	468	46/206(22.33)	6.51e-08	experimentally verified	VF0560	Capsule	Klebsiella pneumoniae subsp. pneumoniae NTUH-K2044	gnd	6-phosphogluconate dehydrogenase	http://www.mgc.ac.cn/cgi-bin/VFs/vfs.cgi?VFID=VF0560#VF0560
orf01348	353	VFG000344(gb|NP_438273)	351	130/346(37.57)	3.25e-70	experimentally verified	VF0268	HitABC	Haemophilus influenzae Rd KW20	hitC	iron(III) ABC transporter, ATP-binding protein	http://www.mgc.ac.cn/cgi-bin/VFs/vfs.cgi?VFID=VF0268#VF0268
orf01354	333	VFG002158(gb|NP_464456)	331	204/331(61.63)	3.04e-149	experimentally verified	VF0347	LplA1	Listeria monocytogenes EGD-e	lplA1	lipoate protein ligase	http://www.mgc.ac.cn/cgi-bin/VFs/vfs.cgi?VFID=VF0347#VF0347
orf01355	378	VFG001964(gb|NP_282577)	390	83/302(27.48)	6.81e-24	experimentally verified	VF0323	Capsule	Campylobacter jejuni subsp. jejuni NCTC 11168	Cj1436c	aminotransferase	http://www.mgc.ac.cn/cgi-bin/VFs/vfs.cgi?VFID=VF0323#VF0323
orf01358	335	VFG000918(gb|NP_756175)	330	75/266(28.20)	1.03e-27	experimentally verified	VF0227	Chu	Escherichia coli CFT073	chuT	periplasmic heme-binding protein ChuT	http://www.mgc.ac.cn/cgi-bin/VFs/vfs.cgi?VFID=VF0227#VF0227
orf01359	348	VFG000922(gb|NP_756179)	330	110/295(37.29)	2.61e-58	experimentally verified	VF0227	Chu	Escherichia coli CFT073	chuU	heme permease protein ChuU	http://www.mgc.ac.cn/cgi-bin/VFs/vfs.cgi?VFID=VF0227#VF0227
orf01360	278	VFG000925(gb|NP_752606)	271	105/258(40.70)	1.24e-64	experimentally verified	VF0228	Enterobactin	Escherichia coli CFT073	fepC	ferrienterobactin ABC transporter ATPase	http://www.mgc.ac.cn/cgi-bin/VFs/vfs.cgi?VFID=VF0228#VF0228
orf01365	567	VFG001228(gb|NP_249102)	682	50/128(39.06)	3.08e-20	experimentally verified	VF0082	Type IV pili	Pseudomonas aeruginosa PAO1	pilJ	twitching motility protein PilJ	http://www.mgc.ac.cn/cgi-bin/VFs/vfs.cgi?VFID=VF0082#VF0082
orf01395	163	VFG048863(gb|YP_002920356.1)	152	29/102(28.43)	2.2e-06	experimentally verified	VF0560	Capsule	Klebsiella pneumoniae subsp. pneumoniae NTUH-K2044	wcaH	GDP-mannose mannosyl hydrolase	http://www.mgc.ac.cn/cgi-bin/VFs/vfs.cgi?VFID=VF0560#VF0560
orf01402	326	VFG000924(gb|NP_752610)	318	58/200(29.00)	1.88e-06	experimentally verified	VF0228	Enterobactin	Escherichia coli CFT073	fepB	ferrienterobactin ABC transporter periplasmic binding protein	http://www.mgc.ac.cn/cgi-bin/VFs/vfs.cgi?VFID=VF0228#VF0228
orf01403	335	VFG000926(gb|NP_752608)	338	104/317(32.81)	2.56e-48	experimentally verified	VF0228	Enterobactin	Escherichia coli CFT073	fepD	ferrienterobactin ABC transporter permease	http://www.mgc.ac.cn/cgi-bin/VFs/vfs.cgi?VFID=VF0228#VF0228
orf01404	340	VFG013069(gb|YP_405014)	318	102/290(35.17)	1.2e-44	experimentally verified	VF0256	Shu	Shigella dysenteriae Sd197	shuU	permease of iron compound ABC transport system	http://www.mgc.ac.cn/cgi-bin/VFs/vfs.cgi?VFID=VF0256#VF0256
orf01405	256	VFG012501(gb|NP_753165)	318	74/236(31.36)	7.68e-28	experimentally verified	IA013	Salmochelin	Escherichia coli CFT073	iroE	esterase	None
orf01430	345	VFG048229(gb|YP_002921134.1)	201	40/173(23.12)	8.13e-12	experimentally verified	VF0566	Type I fimbriae	Klebsiella pneumoniae subsp. pneumoniae NTUH-K2044	fimB	tyrosine recombinase	http://www.mgc.ac.cn/cgi-bin/VFs/vfs.cgi?VFID=VF0566#VF0566
orf01461	175	VFG011439(gb|NP_540129)	235	33/105(31.43)	1.22e-07	experimentally verified	CVF383	LPS	Brucella melitensis bv. 1 str. 16M	lpxE	phosphatidylglycerophosphatase B	None
orf01462	412	VFG037678(gb|YP_001847021)	415	81/364(22.25)	1.23e-08	experimentally verified	VF0472	PNAG	Acinetobacter baumannii ACICU	pgaC	poly-beta-1,6 N-acetyl-D-glucosamine synthase	http://www.mgc.ac.cn/cgi-bin/VFs/vfs.cgi?VFID=VF0472#VF0472
orf01466	512	VFG044172(gb|NP_756180)	266	72/260(27.69)	2.59e-18	experimentally verified	VF0227	Chu	Escherichia coli CFT073	chuV	ATP-binding hydrophilic protein ChuV	http://www.mgc.ac.cn/cgi-bin/VFs/vfs.cgi?VFID=VF0227#VF0227
orf01478	367	VFG038759(gb|YP_857329)	344	88/336(26.19)	2.52e-29	experimentally verified	AI144	ND	Aeromonas hydrophila subsp. hydrophila ATCC 7966	fleS/flrB	two-component sensor kinase	None
orf01480	713	VFG045467(gb|YP_107884)	580	160/448(35.71)	9.49e-80	experimentally verified	VF0432	CdpA	Burkholderia pseudomallei K96243	cdpA	cyclic di-GMP phosphodiesterase	http://www.mgc.ac.cn/cgi-bin/VFs/vfs.cgi?VFID=VF0432#VF0432
orf01482	616	VFG010862(gb|YP_094891)	246	59/191(30.89)	3.78e-14	experimentally verified	CVF358	Cytochrome c maturation (ccm) locus	Legionella pneumophila subsp. pneumophila str. Philadelphia 1	ccmA	ABC transporter involved in cytochrome c biogenesis, ATPase component CcmA	None
orf01496	403	VFG001965(gb|NP_282578)	367	69/260(26.54)	2.5e-13	experimentally verified	VF0323	Capsule	Campylobacter jejuni subsp. jejuni NCTC 11168	Cj1437c	aminotransferase	http://www.mgc.ac.cn/cgi-bin/VFs/vfs.cgi?VFID=VF0323#VF0323
orf01518	527	VFG014950(gb|NP_249457)	474	114/283(40.28)	2.47e-60	experimentally verified	CVF523	Alginate regulation	Pseudomonas aeruginosa PAO1	mucD	serine protease MucD precursor	None
orf01519	229	VFG001386(gb|NP_215271)	247	105/223(47.09)	1.61e-70	experimentally verified	VF0286	PhoP	Mycobacterium tuberculosis H37Rv	phoP	Possible two component system response transcriptional positive regulator PhoP	http://www.mgc.ac.cn/cgi-bin/VFs/vfs.cgi?VFID=VF0286#VF0286
orf01520	492	VFG009810(gb|NP_215272)	485	100/318(31.45)	5.23e-33	experimentally verified	CVF331	PhoP/R	Mycobacterium tuberculosis H37Rv	phoR	Possible two component system response sensor kinase membrane associated PhoR	None
orf01522	345	VFG011414(gb|NP_539767)	277	78/269(29.00)	1.85e-21	experimentally verified	CVF383	LPS	Brucella melitensis bv. 1 str. 16M	kdsA	2-dehydro-3-deoxyphosphooctonate aldolase	None
orf01535	340	VFG043366(gb|NP_206899)	675	47/137(34.31)	4.76e-13	experimentally verified	AI150	Pse5Ac7Ac	Helicobacter pylori 26695	tlpA	membrane-bound chemoreceptor sensing arginine and bicarbonate	None
orf01541	453	VFG009810(gb|NP_215272)	485	69/231(29.87)	3.35e-23	experimentally verified	CVF331	PhoP/R	Mycobacterium tuberculosis H37Rv	phoR	Possible two component system response sensor kinase membrane associated PhoR	None
orf01542	233	VFG001386(gb|NP_215271)	247	94/228(41.23)	2.54e-57	experimentally verified	VF0286	PhoP	Mycobacterium tuberculosis H37Rv	phoP	Possible two component system response transcriptional positive regulator PhoP	http://www.mgc.ac.cn/cgi-bin/VFs/vfs.cgi?VFID=VF0286#VF0286
orf01543	228	VFG001386(gb|NP_215271)	247	81/224(36.16)	8.97e-48	experimentally verified	VF0286	PhoP	Mycobacterium tuberculosis H37Rv	phoP	Possible two component system response transcriptional positive regulator PhoP	http://www.mgc.ac.cn/cgi-bin/VFs/vfs.cgi?VFID=VF0286#VF0286
orf01544	527	VFG009810(gb|NP_215272)	485	91/317(28.71)	3.17e-24	experimentally verified	CVF331	PhoP/R	Mycobacterium tuberculosis H37Rv	phoR	Possible two component system response sensor kinase membrane associated PhoR	None
orf01549	253	VFG001386(gb|NP_215271)	247	85/227(37.44)	5.24e-41	experimentally verified	VF0286	PhoP	Mycobacterium tuberculosis H37Rv	phoP	Possible two component system response transcriptional positive regulator PhoP	http://www.mgc.ac.cn/cgi-bin/VFs/vfs.cgi?VFID=VF0286#VF0286
orf01550	356	VFG009810(gb|NP_215272)	485	56/242(23.14)	1.07e-13	experimentally verified	CVF331	PhoP/R	Mycobacterium tuberculosis H37Rv	phoR	Possible two component system response sensor kinase membrane associated PhoR	None
orf01551	307	VFG050113(gb|YP_002336033.1)	291	75/225(33.33)	6.41e-36	experimentally verified	VF0583	Cereulide	Bacillus cereus AH187	cesC	ABC transporter ATP-binding protein, CesC	http://www.mgc.ac.cn/cgi-bin/VFs/vfs.cgi?VFID=VF0583#VF0583
orf01557	225	VFG038219(gb|YP_001845364)	238	24/89(26.97)	9.22e-06	experimentally verified	VF0463	BfmRS	Acinetobacter baumannii ACICU	bfmR	biofilm-controlling response regulator	http://www.mgc.ac.cn/cgi-bin/VFs/vfs.cgi?VFID=VF0463#VF0463
orf01559	633	VFG000907(gb|NP_755448)	707	145/510(28.43)	4.59e-48	experimentally verified	VF0225	<alpha>-Hemolysin	Escherichia coli CFT073	hlyB	Hemolysin B	http://www.mgc.ac.cn/cgi-bin/VFs/vfs.cgi?VFID=VF0225#VF0225
orf01566	233	VFG050117(gb|YP_002336037.1)	251	67/209(32.06)	2.51e-32	experimentally verified	VF0583	Cereulide	Bacillus cereus AH187	cesP	4'-phosphopantetheinyl transferase, CesP	http://www.mgc.ac.cn/cgi-bin/VFs/vfs.cgi?VFID=VF0583#VF0583
orf01568	541	VFG049919(gb|AAD32394.1)	652	33/112(29.46)	4.96e-09	experimentally verified	CVF880	BslA	Bacillus anthracis str. Sterne	pXO1-90	s-layer protein	None
orf01576	331	VFG037372(gb|YP_001847241)	322	60/201(29.85)	7.66e-11	experimentally verified	VF0467	Acinetobactin	Acinetobacter baumannii ACICU	bauB	ferric siderophore ABC transporter, periplasmic siderophore-binding protein	http://www.mgc.ac.cn/cgi-bin/VFs/vfs.cgi?VFID=VF0467#VF0467
orf01577	660	VFG000926(gb|NP_752608)	338	120/318(37.74)	7.47e-52	experimentally verified	VF0228	Enterobactin	Escherichia coli CFT073	fepD	ferrienterobactin ABC transporter permease	http://www.mgc.ac.cn/cgi-bin/VFs/vfs.cgi?VFID=VF0228#VF0228
orf01582	151	VFG039386(gb|NP_819821)	145	28/89(31.46)	1.69e-07	experimentally verified	SS051	Dot/Icm	Coxiella burnetii RSA 493	coxH2	Coxiella Dot/Icm type IVB secretion system translocated effector	None
orf01595	490	VFG049158(gb|YP_006635484.1)	487	76/233(32.62)	1.54e-21	experimentally verified	VF0573	Colibactin	Klebsiella pneumoniae subsp. pneumoniae 1084	clbL	colibactin biosynthesis amidase ClbL	http://www.mgc.ac.cn/cgi-bin/VFs/vfs.cgi?VFID=VF0573#VF0573
orf01602	157	VFG000307(gb|NP_207041)	144	48/140(34.29)	2.44e-24	experimentally verified	VF0052	HP-NAP	Helicobacter pylori 26695	napA	neutrophil activating protein NapA	http://www.mgc.ac.cn/cgi-bin/VFs/vfs.cgi?VFID=VF0052#VF0052
orf01604	260	VFG009570(gb|NP_215864)	859	67/229(29.26)	1.34e-16	experimentally verified	IA031	mycobactin	Mycobacterium tuberculosis H37Rv	irtA	Iron-regulated transporter IrtA	None
orf01613	484	VFG002420(gb|NP_644838)	772	132/536(24.63)	1.5e-27	experimentally verified	VF0422	AdsA	Staphylococcus aureus subsp. aureus MW2	adsA	Adenosine synthase A	http://www.mgc.ac.cn/cgi-bin/VFs/vfs.cgi?VFID=VF0422#VF0422
orf01616	452	VFG038900(gb|YP_857314)	439	110/431(25.52)	3.43e-34	experimentally verified	CVF792	Hemolysin HlyA	Aeromonas hydrophila subsp. hydrophila ATCC 7966	hlyA	Hemolysin A	None
orf01619	357	VFG013315(gb|NP_438813)	254	44/98(44.90)	1.53e-18	experimentally verified	CVF494	LOS	Haemophilus influenzae Rd KW20	lgtF	beta-1,4-glucosyltransferase	None
orf01646	280	VFG048488(gb|YP_002918371.1)	264	75/242(30.99)	5.13e-27	experimentally verified	VF0562	Ent	Klebsiella pneumoniae subsp. pneumoniae NTUH-K2044	fepC	iron-enterobactin transporter ATP-binding protein	http://www.mgc.ac.cn/cgi-bin/VFs/vfs.cgi?VFID=VF0562#VF0562
orf01656	306	VFG038839(gb|YP_858598)	249	88/249(35.34)	3.45e-35	experimentally verified	CVF786	Polar flagella	Aeromonas hydrophila subsp. hydrophila ATCC 7966	flmH	short chain dehydrogenase/reductase family oxidoreductase	None
orf01657	600	VFG009810(gb|NP_215272)	485	83/233(35.62)	4.1e-38	experimentally verified	CVF331	PhoP/R	Mycobacterium tuberculosis H37Rv	phoR	Possible two component system response sensor kinase membrane associated PhoR	None
orf01658	243	VFG001386(gb|NP_215271)	247	83/228(36.40)	4.13e-50	experimentally verified	VF0286	PhoP	Mycobacterium tuberculosis H37Rv	phoP	Possible two component system response transcriptional positive regulator PhoP	http://www.mgc.ac.cn/cgi-bin/VFs/vfs.cgi?VFID=VF0286#VF0286
orf01659	374	VFG000088(gb|NP_230473)	620	53/205(25.85)	4.73e-14	experimentally verified	VF0126	TCP	Vibrio cholerae O1 biovar El Tor str. N16961	tcpI	negative regulator of the major pilin TcpA	http://www.mgc.ac.cn/cgi-bin/VFs/vfs.cgi?VFID=VF0126#VF0126
orf01660	252	VFG000344(gb|NP_438273)	351	69/250(27.60)	2.23e-27	experimentally verified	VF0268	HitABC	Haemophilus influenzae Rd KW20	hitC	iron(III) ABC transporter, ATP-binding protein	http://www.mgc.ac.cn/cgi-bin/VFs/vfs.cgi?VFID=VF0268#VF0268
orf01673	417	VFG001234(gb|NP_249107)	264	35/109(32.11)	9.31e-08	experimentally verified	VF0082	Type IV pili	Pseudomonas aeruginosa PAO1	chpD	probable transcriptional regulator	http://www.mgc.ac.cn/cgi-bin/VFs/vfs.cgi?VFID=VF0082#VF0082
orf01691	300	VFG049114(gb|YP_002918199.1)	307	49/227(21.59)	8.78e-06	experimentally verified	VF0572	Allantion utilization	Klebsiella pneumoniae subsp. pneumoniae NTUH-K2044	allS	DNA-binding transcriptional activator AllS	http://www.mgc.ac.cn/cgi-bin/VFs/vfs.cgi?VFID=VF0572#VF0572
orf01712	392	VFG039282(gb|NP_819314)	406	247/392(63.01)	4.29e-168	experimentally verified	CVF803	T4SS effectors	Coxiella burnetii RSA 493	CBU_0270	Coxiella Dot/Icm type IVB secretion system translocated effector, trans-2-enoyl-CoA reductase	None
orf01715	361	VFG002197(gb|NP_814691)	336	62/242(25.62)	2.26e-12	experimentally verified	VF0362	BopD	Enterococcus faecalis V583	bopD	sugar-binding transcriptional regulator, LacI family	http://www.mgc.ac.cn/cgi-bin/VFs/vfs.cgi?VFID=VF0362#VF0362
orf01721	379	VFG033025(gb|NP_463944)	466	61/196(31.12)	7.62e-20	experimentally verified	VF0442	PgdA	Listeria monocytogenes EGD-e	pdgA	Peptidoglycan N-deacetylase	http://www.mgc.ac.cn/cgi-bin/VFs/vfs.cgi?VFID=VF0442#VF0442
orf01733	660	VFG002549(gb|YP_109385)	510	62/257(24.12)	2.76e-10	experimentally verified	VF0436	Capsule I	Burkholderia pseudomallei K96243	wcbQ	capsular polysaccharide biosynthesis transmembrane protein	http://www.mgc.ac.cn/cgi-bin/VFs/vfs.cgi?VFID=VF0436#VF0436
orf01736	406	VFG044198(gb|YP_169104)	420	108/422(25.59)	9.57e-26	experimentally verified	VF0551	Rhizoferrin	Francisella tularensis subsp. tularensis SCHU S4	fslB	MFS transporter, inner membrane protein responsible for uptake of the ferric-siderophore complex	http://www.mgc.ac.cn/cgi-bin/VFs/vfs.cgi?VFID=VF0551#VF0551
orf01740	457	VFG000680(gb|AAF13661)	411	93/291(31.96)	3.42e-42	experimentally verified	VF0141	Capsule	Bacillus anthracis	capA	CapA, required for Poly-gamma-glutamate transport	http://www.mgc.ac.cn/cgi-bin/VFs/vfs.cgi?VFID=VF0141#VF0141
orf01746	649	VFG037386(gb|YP_001847242)	256	61/228(26.75)	1.05e-17	experimentally verified	VF0467	Acinetobactin	Acinetobacter baumannii ACICU	bauE	ferric siderophore ABC transporter, ATP-binding protein BauE	http://www.mgc.ac.cn/cgi-bin/VFs/vfs.cgi?VFID=VF0467#VF0467
orf01757	456	VFG049159(gb|YP_006635485.1)	479	93/458(20.31)	5.37e-09	experimentally verified	VF0573	Colibactin	Klebsiella pneumoniae subsp. pneumoniae 1084	clbM	precolibactin export MATE transporter ClbM	http://www.mgc.ac.cn/cgi-bin/VFs/vfs.cgi?VFID=VF0573#VF0573
orf01766	329	VFG044083(gb|NP_250948)	312	66/252(26.19)	2.07e-12	experimentally verified	IA001	pyoverdine	Pseudomonas aeruginosa PAO1	ptxR	transcriptional regulator PtxR	None
orf01785	374	VFG011453(gb|NP_540310)	377	68/263(25.86)	4.58e-16	experimentally verified	CVF383	LPS	Brucella melitensis bv. 1 str. 16M	wbpZ	mannosyltransferase C	None
orf01793	170	VFG037100(gb|NP_273110)	522	45/133(33.83)	6.6e-22	experimentally verified	VF0456	MsrAB	Neisseria meningitidis MC58	msrA/B(pilB)	trifunctional thioredoxin/methionine sulfoxide reductase A/B protein	http://www.mgc.ac.cn/cgi-bin/VFs/vfs.cgi?VFID=VF0456#VF0456
orf01801	412	VFG002548(gb|YP_109384)	2546	110/359(30.64)	1.77e-36	experimentally verified	VF0436	Capsule I	Burkholderia pseudomallei K96243	wcbR	capsular polysaccharide biosynthesis fatty acid synthase	http://www.mgc.ac.cn/cgi-bin/VFs/vfs.cgi?VFID=VF0436#VF0436
orf01806	195	VFG001284(gb|NP_647402)	186	17/52(32.69)	1.41e-06	experimentally verified	VF0014	Intercellular adhesion proteins	Staphylococcus aureus subsp. aureus MW2	icaR	ica operon transcriptional regulator IcaR	http://www.mgc.ac.cn/cgi-bin/VFs/vfs.cgi?VFID=VF0014#VF0014
orf01810	394	VFG001965(gb|NP_282578)	367	70/263(26.62)	2.61e-17	experimentally verified	VF0323	Capsule	Campylobacter jejuni subsp. jejuni NCTC 11168	Cj1437c	aminotransferase	http://www.mgc.ac.cn/cgi-bin/VFs/vfs.cgi?VFID=VF0323#VF0323
orf01822	141	VFG039371(gb|NP_819795)	156	36/138(26.09)	6.01e-09	experimentally verified	CVF803	T4SS effectors	Coxiella burnetii RSA 493	phnB	Coxiella Dot/Icm type IVB secretion system translocated effector	None
orf01825	411	VFG045330(gb|YP_095353)	386	45/183(24.59)	4.88e-09	experimentally verified	VF0291	Legiobactin	Legionella pneumophila subsp. pneumophila str. Philadelphia 1	lbtC	LbtC inner membrane protein required for import of Legiobactin	http://www.mgc.ac.cn/cgi-bin/VFs/vfs.cgi?VFID=VF0291#VF0291
orf01838	389	VFG000031(gb|NP_878988)	390	71/252(28.17)	4.07e-20	experimentally verified	VF0033	LPS	Bordetella pertussis Tohama I	bplH	putative glycosyl transferase	http://www.mgc.ac.cn/cgi-bin/VFs/vfs.cgi?VFID=VF0033#VF0033
orf01847	567	VFG043378(gb|NP_207394)	433	42/92(45.65)	7.15e-16	experimentally verified	AI150	Pse5Ac7Ac	Helicobacter pylori 26695	cheV3	chemotaxis coupling protein CheV3	None
orf01851	309	VFG007177(gb|NP_798078)	286	65/280(23.21)	5.82e-13	experimentally verified	VF0408	T3SS1	Vibrio parahaemolyticus RIMD 2210633	exsA	transcriptional regulator ExsA	http://www.mgc.ac.cn/cgi-bin/VFs/vfs.cgi?VFID=VF0408#VF0408
orf01854	572	VFG000104(gb|NP_230488)	626	54/239(22.59)	3.23e-13	experimentally verified	VF0127	ACF	Vibrio cholerae O1 biovar El Tor str. N16961	acfB	accessory colonization factor AcfB, methyl-accepting chemoreceptor	http://www.mgc.ac.cn/cgi-bin/VFs/vfs.cgi?VFID=VF0127#VF0127
orf01857	151	VFG001713(gb|NP_755457)	183	31/86(36.05)	2.95e-10	experimentally verified	CVF425	P fimbriae	Escherichia coli CFT073	papX	PapX protein regulates flagellum synthesis to repress motility	None
orf01862	332	VFG037664(gb|YP_001847022)	609	64/235(27.23)	2.36e-23	experimentally verified	VF0472	PNAG	Acinetobacter baumannii ACICU	pgaB	poly-beta-1,6-N-acetyl-D-glucosamine N-deacetylase PgaB	http://www.mgc.ac.cn/cgi-bin/VFs/vfs.cgi?VFID=VF0472#VF0472
orf01863	1231	VFG016041(gb|NP_251092)	5149	248/690(35.94)	5.98e-118	experimentally verified	IA001	pyoverdine	Pseudomonas aeruginosa PAO1	pvdI	peptide synthase	None
orf01864	589	VFG000104(gb|NP_230488)	626	96/337(28.49)	6.7e-27	experimentally verified	VF0127	ACF	Vibrio cholerae O1 biovar El Tor str. N16961	acfB	accessory colonization factor AcfB, methyl-accepting chemoreceptor	http://www.mgc.ac.cn/cgi-bin/VFs/vfs.cgi?VFID=VF0127#VF0127
orf01870	577	VFG038698(gb|YP_855922)	127	35/118(29.66)	1.75e-13	experimentally verified	AI144	ND	Aeromonas hydrophila subsp. hydrophila ATCC 7966	cheY	chemotaxis protein CheY	None
orf01881	383	VFG006717(gb|NP_465159)	866	127/387(32.82)	2.52e-48	experimentally verified	VF0444	Lap	Listeria monocytogenes EGD-e	lap	Listeria adhesion protein Lap	http://www.mgc.ac.cn/cgi-bin/VFs/vfs.cgi?VFID=VF0444#VF0444
orf01891	372	VFG032992(gb|NP_464816)	622	76/321(23.68)	1.52e-06	experimentally verified	VF0441	OatA	Listeria monocytogenes EGD-e	oatA	peptidoglycan O-acetyltransferase	http://www.mgc.ac.cn/cgi-bin/VFs/vfs.cgi?VFID=VF0441#VF0441
orf01896	173	VFG000320(gb|NP_208266)	157	66/148(44.59)	3.53e-42	experimentally verified	VF0056	LPS	Helicobacter pylori 26695	kdtB	lipopolysaccharide core biosynthesis protein	http://www.mgc.ac.cn/cgi-bin/VFs/vfs.cgi?VFID=VF0056#VF0056
orf01904	313	VFG049153(gb|YP_006635479.1)	415	83/287(28.92)	1.36e-31	experimentally verified	VF0573	Colibactin	Klebsiella pneumoniae subsp. pneumoniae 1084	clbG	colibactin biosynthesis acyltransferase ClbG	http://www.mgc.ac.cn/cgi-bin/VFs/vfs.cgi?VFID=VF0573#VF0573
orf01905	249	VFG005767(gb|NP_687682)	240	103/243(42.39)	4.01e-56	experimentally verified	CVF171	Beta-hemolysin/cytolysin	Streptococcus agalactiae 2603V/R	cylG	3-ketoacyl-ACP-reductase CylG	None
orf01906	77	VFG011430(gb|NP_540392)	78	47/73(64.38)	4.54e-24	experimentally verified	CVF383	LPS	Brucella melitensis bv. 1 str. 16M	acpXL	acyl carrier protein	None
orf01907	412	VFG005788(gb|NP_687689)	731	131/417(31.41)	5.29e-46	experimentally verified	CVF171	Beta-hemolysin/cytolysin	Streptococcus agalactiae 2603V/R	cylI	putative 3-ketoacyl-ACP synthase CylI	None
orf01910	338	VFG038686(gb|YP_855919)	473	68/223(30.49)	1.65e-18	experimentally verified	AI144	ND	Aeromonas hydrophila subsp. hydrophila ATCC 7966	flhF	flagellar biosynthesis protein FlhF	None
orf01911	216	VFG038904(gb|YP_857967)	211	99/207(47.83)	1.84e-52	experimentally verified	CVF793	Hemolysin III	Aeromonas hydrophila subsp. hydrophila ATCC 7966	AHA_3493	hemolysin III	None
orf01913	458	VFG038686(gb|YP_855919)	473	56/180(31.11)	1.92e-11	experimentally verified	AI144	ND	Aeromonas hydrophila subsp. hydrophila ATCC 7966	flhF	flagellar biosynthesis protein FlhF	None
orf01919	208	VFG042972(gb|YP_002742499)	183	37/138(26.81)	3.71e-12	experimentally verified	VF0530	PI-2	Streptococcus pneumoniae Taiwan19F-14	sipA	signal peptidase I	http://www.mgc.ac.cn/cgi-bin/VFs/vfs.cgi?VFID=VF0530#VF0530
orf01923	99	VFG002523(gb|YP_109891)	405	40/79(50.63)	1.71e-16	experimentally verified	VF0430	Flagella	Burkholderia pseudomallei K96243	flhB	flagellar biosynthesis protein FlhB	http://www.mgc.ac.cn/cgi-bin/VFs/vfs.cgi?VFID=VF0430#VF0430
orf01937	135	VFG001991(gb|YP_095247)	130	42/120(35.00)	5.75e-12	experimentally verified	VF0157	Flagella	Legionella pneumophila subsp. pneumophila str. Philadelphia 1	flgB	flagellar basal body rod protein FlgB	http://www.mgc.ac.cn/cgi-bin/VFs/vfs.cgi?VFID=VF0157#VF0157
orf01938	150	VFG002509(gb|YP_106898)	141	65/145(44.83)	5.82e-34	experimentally verified	VF0430	Flagella	Burkholderia pseudomallei K96243	flgC	flagellar basal body rod protein FlgC	http://www.mgc.ac.cn/cgi-bin/VFs/vfs.cgi?VFID=VF0430#VF0430
orf01939	104	VFG001250(gb|NP_249791)	109	32/85(37.65)	1.64e-11	experimentally verified	VF0273	Flagella	Pseudomonas aeruginosa PAO1	fliE	flagellar hook-basal body complex protein FliE	http://www.mgc.ac.cn/cgi-bin/VFs/vfs.cgi?VFID=VF0273#VF0273
orf01940	527	VFG002502(gb|YP_106858)	598	88/354(24.86)	4.71e-29	experimentally verified	VF0430	Flagella	Burkholderia pseudomallei K96243	fliF	flagellar M-ring protein FliF	http://www.mgc.ac.cn/cgi-bin/VFs/vfs.cgi?VFID=VF0430#VF0430
orf01941	338	VFG006562(gb|NP_207150)	343	127/336(37.80)	5.76e-74	experimentally verified	VF0051	Flagella	Helicobacter pylori 26695	fliG	flagellar motor switch protein G	http://www.mgc.ac.cn/cgi-bin/VFs/vfs.cgi?VFID=VF0051#VF0051
orf01942	278	VFG002130(gb|NP_220076)	223	34/105(32.38)	1.88e-12	experimentally verified	VF0344	TTSS	Chlamydia trachomatis D/UW-3/CX	cdsL	type III secretion translocase	http://www.mgc.ac.cn/cgi-bin/VFs/vfs.cgi?VFID=VF0344#VF0344
orf01943	439	VFG002144(gb|NP_220188)	442	226/431(52.44)	1.99e-150	experimentally verified	VF0344	TTSS	Chlamydia trachomatis D/UW-3/CX	cdsN	Type III secretion system ATPase	http://www.mgc.ac.cn/cgi-bin/VFs/vfs.cgi?VFID=VF0344#VF0344
orf01947	177	VFG001237(gb|NP_249770)	237	35/79(44.30)	1.18e-14	experimentally verified	VF0273	Flagella	Pseudomonas aeruginosa PAO1	flgD	flagellar basal-body rod modification protein FlgD	http://www.mgc.ac.cn/cgi-bin/VFs/vfs.cgi?VFID=VF0273#VF0273
orf01949	269	VFG006701(gb|NP_208376)	262	116/270(42.96)	3.29e-54	experimentally verified	VF0051	Flagella	Helicobacter pylori 26695	flgG	flagellar basal-body rod protein (flgG)	http://www.mgc.ac.cn/cgi-bin/VFs/vfs.cgi?VFID=VF0051#VF0051
orf01951	157	VFG006627(gb|NP_207602)	183	19/59(32.20)	1.55e-07	experimentally verified	VF0051	Flagella	Helicobacter pylori 26695	fliL	flagellar basal body protein FliL	http://www.mgc.ac.cn/cgi-bin/VFs/vfs.cgi?VFID=VF0051#VF0051
orf01952	332	VFG001893(gb|NP_281275)	359	122/337(36.20)	1.14e-66	experimentally verified	VF0114	Flagella	Campylobacter jejuni subsp. jejuni NCTC 11168	fliM	flagellar motor switch protein FliM	http://www.mgc.ac.cn/cgi-bin/VFs/vfs.cgi?VFID=VF0114#VF0114
orf01953	436	VFG002492(gb|YP_106653)	165	52/111(46.85)	1.26e-28	experimentally verified	VF0430	Flagella	Burkholderia pseudomallei K96243	fliN	flagellar motor switch protein FliN	http://www.mgc.ac.cn/cgi-bin/VFs/vfs.cgi?VFID=VF0430#VF0430
orf01954	121	VFG007550(gb|NP_231694)	377	48/111(43.24)	1.86e-21	experimentally verified	VF0519	Flagella	Vibrio cholerae O1 biovar El Tor str. N16961	cheB	chemotaxis-specific methylesterase	http://www.mgc.ac.cn/cgi-bin/VFs/vfs.cgi?VFID=VF0519#VF0519
orf01956	251	VFG001259(gb|NP_250137)	255	130/231(56.28)	1.42e-76	experimentally verified	VF0273	Flagella	Pseudomonas aeruginosa PAO1	fliP	flagellar biosynthetic protein FliP	http://www.mgc.ac.cn/cgi-bin/VFs/vfs.cgi?VFID=VF0273#VF0273
orf01957	89	VFG001929(gb|NP_282802)	89	44/88(50.00)	1.96e-23	experimentally verified	VF0114	Flagella	Campylobacter jejuni subsp. jejuni NCTC 11168	fliQ	flagellar biosynthesis protein FliQ	http://www.mgc.ac.cn/cgi-bin/VFs/vfs.cgi?VFID=VF0114#VF0114
orf01958	261	VFG002496(gb|YP_106657)	260	80/238(33.61)	1.15e-33	experimentally verified	VF0430	Flagella	Burkholderia pseudomallei K96243	fliR	flagellar biosynthetic protein FliR	http://www.mgc.ac.cn/cgi-bin/VFs/vfs.cgi?VFID=VF0430#VF0430
orf01959	370	VFG001900(gb|NP_281526)	362	138/346(39.88)	1.27e-83	experimentally verified	VF0114	Flagella	Campylobacter jejuni subsp. jejuni NCTC 11168	flhB	flagellar biosynthetic protein	http://www.mgc.ac.cn/cgi-bin/VFs/vfs.cgi?VFID=VF0114#VF0114
orf01960	677	VFG002522(gb|YP_109890)	700	291/672(43.30)	6.16e-170	experimentally verified	VF0430	Flagella	Burkholderia pseudomallei K96243	flhA	flagellar biosynthesis protein FlhA	http://www.mgc.ac.cn/cgi-bin/VFs/vfs.cgi?VFID=VF0430#VF0430
orf01961	481	VFG007586(gb|NP_231700)	495	142/502(28.29)	1.04e-39	experimentally verified	VF0519	Flagella	Vibrio cholerae O1 biovar El Tor str. N16961	flhF	flagellar biosynthesis protein	http://www.mgc.ac.cn/cgi-bin/VFs/vfs.cgi?VFID=VF0519#VF0519
orf01962	295	VFG043350(gb|YP_095809)	295	101/277(36.46)	2.19e-58	experimentally verified	AI149	polar flagella	Legionella pneumophila subsp. pneumophila str. Philadelphia 1	fleN	flagellar synthesis regulator FleN	None
orf01963	514	VFG038710(gb|YP_855925)	371	145/507(28.60)	1.47e-53	experimentally verified	AI144	ND	Aeromonas hydrophila subsp. hydrophila ATCC 7966	cheB-2	chemotaxis-specific methylesterase	None
orf01964	698	VFG043394(gb|YP_002343725)	769	256/702(36.47)	5.96e-120	experimentally verified	AI151	Pse5Ac7Ac, Pse5Ac7Am, Pse8OAc, Pse5Am7AcGlnAc	Campylobacter jejuni subsp. jejuni NCTC 11168	cheA	chemotaxis histidine kinase	None
orf01965	153	VFG002530(gb|YP_109901)	175	56/144(38.89)	2.08e-34	experimentally verified	VF0430	Flagella	Burkholderia pseudomallei K96243	cheW	chemotaxis protein CheW	http://www.mgc.ac.cn/cgi-bin/VFs/vfs.cgi?VFID=VF0430#VF0430
orf01969	262	VFG002319(gb|YP_001006726)	240	89/226(39.38)	6.14e-47	experimentally verified	VF0394	Flagella	Yersinia enterocolitica subsp. enterocolitica 8081	fliA	flagellar biosynthesis sigma factor	http://www.mgc.ac.cn/cgi-bin/VFs/vfs.cgi?VFID=VF0394#VF0394
orf01979	255	VFG002190(gb|NP_816141)	271	124/248(50.00)	4.88e-87	experimentally verified	VF0361	Capsule	Enterococcus faecalis V583	cpsA	undecaprenyl diphosphate synthase	http://www.mgc.ac.cn/cgi-bin/VFs/vfs.cgi?VFID=VF0361#VF0361
orf01980	263	VFG002189(gb|NP_816140)	266	97/266(36.47)	3.73e-49	experimentally verified	VF0361	Capsule	Enterococcus faecalis V583	cpsB	phosphatidate cytidylyltransferase	http://www.mgc.ac.cn/cgi-bin/VFs/vfs.cgi?VFID=VF0361#VF0361
orf01982	423	VFG015000(gb|NP_252339)	450	110/442(24.89)	1.58e-27	experimentally verified	CVF523	Alginate regulation	Pseudomonas aeruginosa PAO1	mucP	metalloprotease protease	None
orf01986	153	VFG039491(gb|NP_820417)	153	51/145(35.17)	1.22e-25	experimentally verified	CVF803	T4SS effectors	Coxiella burnetii RSA 493	CBU_1434	Coxiella Dot/Icm type IVB secretion system translocated effector	None
orf01990	842	VFG046465(gb|YP_169203.1)	394	75/238(31.51)	6.09e-16	experimentally verified	VF0460	EF-Tu	Francisella tularensis subsp. tularensis SCHU S4	tufA	elongation factor Tu	http://www.mgc.ac.cn/cgi-bin/VFs/vfs.cgi?VFID=VF0460#VF0460
orf01997	335	VFG033025(gb|NP_463944)	466	53/172(30.81)	1.6e-23	experimentally verified	VF0442	PgdA	Listeria monocytogenes EGD-e	pdgA	Peptidoglycan N-deacetylase	http://www.mgc.ac.cn/cgi-bin/VFs/vfs.cgi?VFID=VF0442#VF0442
orf02009	893	VFG040864(gb|YP_028298)	1342	66/201(32.84)	1.98e-20	experimentally verified	VF0581	T7SS	Bacillus anthracis str. Sterne	essC	type VII secretion system protein EssC	http://www.mgc.ac.cn/cgi-bin/VFs/vfs.cgi?VFID=VF0581#VF0581
orf02013	255	VFG005767(gb|NP_687682)	240	76/239(31.80)	2.02e-35	experimentally verified	CVF171	Beta-hemolysin/cytolysin	Streptococcus agalactiae 2603V/R	cylG	3-ketoacyl-ACP-reductase CylG	None
orf02027	355	VFG015983(gb|NP_251083)	448	47/188(25.00)	9.37e-08	experimentally verified	IA001	pyoverdine	Pseudomonas aeruginosa PAO1	pvdM	dipeptidase precursor	None
orf02035	188	VFG015512(gb|NP_252902)	207	33/88(37.50)	5.54e-09	experimentally verified	CVF536	Phenazines biosynthesis	Pseudomonas aeruginosa PAO1	phzD1	phenazine biosynthesis protein PhzD, isochorismatase	None
orf02042	696	VFG013248(gb|NP_438233)	587	169/510(33.14)	4.01e-80	experimentally verified	CVF494	LOS	Haemophilus influenzae Rd KW20	msbA	lipid transporter ATP-binding/permease	None
orf02043	585	VFG001269(gb|NP_879579)	712	165/492(33.54)	1.71e-67	experimentally verified	VF0028	Cya	Bordetella pertussis Tohama I	cyaB	cyclolysin secretion ATP-binding protein	http://www.mgc.ac.cn/cgi-bin/VFs/vfs.cgi?VFID=VF0028#VF0028
orf02055	1288	VFG040864(gb|YP_028298)	1342	557/1313(42.42)	0	experimentally verified	VF0581	T7SS	Bacillus anthracis str. Sterne	essC	type VII secretion system protein EssC	http://www.mgc.ac.cn/cgi-bin/VFs/vfs.cgi?VFID=VF0581#VF0581
orf02058	91	VFG040865(gb|YP_028299)	90	33/86(38.37)	7.28e-17	experimentally verified	VF0581	T7SS	Bacillus anthracis str. Sterne	esxB	type VII secretion system protein EsxB	http://www.mgc.ac.cn/cgi-bin/VFs/vfs.cgi?VFID=VF0581#VF0581
orf02059	681	VFG040866(gb|YP_028300)	468	133/315(42.22)	1.92e-73	experimentally verified	VF0581	T7SS	Bacillus anthracis str. Sterne	BAS2037	type VII secretion system protein	http://www.mgc.ac.cn/cgi-bin/VFs/vfs.cgi?VFID=VF0581#VF0581
orf02062	269	VFG048409(gb|YP_002918380.1)	261	89/263(33.84)	7.39e-34	experimentally verified	VF0562	Ent	Klebsiella pneumoniae subsp. pneumoniae NTUH-K2044	entA	2,3-dihydroxybenzoate-2,3-dehydrogenase	http://www.mgc.ac.cn/cgi-bin/VFs/vfs.cgi?VFID=VF0562#VF0562
orf02103	334	VFG000038(gb|NP_878995)	350	44/146(30.14)	2.14e-15	experimentally verified	VF0033	LPS	Bordetella pertussis Tohama I	bplA	probable oxidoreductase	http://www.mgc.ac.cn/cgi-bin/VFs/vfs.cgi?VFID=VF0033#VF0033
orf02116	297	VFG048830(gb|YP_002920353.1)	468	102/288(35.42)	2.02e-45	experimentally verified	VF0560	Capsule	Klebsiella pneumoniae subsp. pneumoniae NTUH-K2044	gnd	6-phosphogluconate dehydrogenase	http://www.mgc.ac.cn/cgi-bin/VFs/vfs.cgi?VFID=VF0560#VF0560
orf02118	402	VFG045330(gb|YP_095353)	386	53/215(24.65)	1.1e-08	experimentally verified	VF0291	Legiobactin	Legionella pneumophila subsp. pneumophila str. Philadelphia 1	lbtC	LbtC inner membrane protein required for import of Legiobactin	http://www.mgc.ac.cn/cgi-bin/VFs/vfs.cgi?VFID=VF0291#VF0291
orf02129	326	VFG002177(gb|AAM75253)	412	72/256(28.12)	6.73e-18	experimentally verified	VF0356	Cytolysin	Enterococcus faecalis str. MMH594	cylA	cytolysin activator	http://www.mgc.ac.cn/cgi-bin/VFs/vfs.cgi?VFID=VF0356#VF0356
orf02135	334	VFG002197(gb|NP_814691)	336	86/337(25.52)	8.31e-29	experimentally verified	VF0362	BopD	Enterococcus faecalis V583	bopD	sugar-binding transcriptional regulator, LacI family	http://www.mgc.ac.cn/cgi-bin/VFs/vfs.cgi?VFID=VF0362#VF0362
orf02145	640	VFG000120(gb|NP_253949)	358	44/170(25.88)	3.12e-12	experimentally verified	VF0091	Alginate	Pseudomonas aeruginosa PAO1	algZ	sigma factor AlgU	http://www.mgc.ac.cn/cgi-bin/VFs/vfs.cgi?VFID=VF0091#VF0091
orf02146	266	VFG043345(gb|YP_095788)	453	40/111(36.04)	9.47e-12	experimentally verified	AI149	polar flagella	Legionella pneumophila subsp. pneumophila str. Philadelphia 1	fleR/flrC	sigma 54-dependent response regulator	None
orf02149	381	VFG047039(gb|YP_170388.1)	294	63/259(24.32)	3e-08	experimentally verified	VF0542	LPS	Francisella tularensis subsp. tularensis SCHU S4	wbtL	glucose-1-phosphate thymidylyltransferase	http://www.mgc.ac.cn/cgi-bin/VFs/vfs.cgi?VFID=VF0542#VF0542
orf02157	296	VFG038332(gb|YP_001144282)	271	31/134(23.13)	5.28e-08	experimentally verified	VF0479	T3SS	Aeromonas salmonicida subsp. salmonicida A449	exsA	Type III secretion system transcriptional regulator	http://www.mgc.ac.cn/cgi-bin/VFs/vfs.cgi?VFID=VF0479#VF0479
orf02163	891	VFG002406(gb|NP_645074)	1009	37/129(28.68)	1.55e-10	experimentally verified	VF0403	Type VII secretion system	Staphylococcus aureus subsp. aureus MW2	esaA	type VII secretion system protein EsaA	http://www.mgc.ac.cn/cgi-bin/VFs/vfs.cgi?VFID=VF0403#VF0403
orf02168	288	VFG049114(gb|YP_002918199.1)	307	56/241(23.24)	2.92e-10	experimentally verified	VF0572	Allantion utilization	Klebsiella pneumoniae subsp. pneumoniae NTUH-K2044	allS	DNA-binding transcriptional activator AllS	http://www.mgc.ac.cn/cgi-bin/VFs/vfs.cgi?VFID=VF0572#VF0572
orf02175	296	VFG049114(gb|YP_002918199.1)	307	67/268(25.00)	1.11e-07	experimentally verified	VF0572	Allantion utilization	Klebsiella pneumoniae subsp. pneumoniae NTUH-K2044	allS	DNA-binding transcriptional activator AllS	http://www.mgc.ac.cn/cgi-bin/VFs/vfs.cgi?VFID=VF0572#VF0572
orf02179	250	VFG001206(gb|NP_273675)	352	82/239(34.31)	3.18e-38	experimentally verified	VF0272	FbpABC	Neisseria meningitidis MC58	fbpC	iron(III) ABC transporter, ATP-binding protein	http://www.mgc.ac.cn/cgi-bin/VFs/vfs.cgi?VFID=VF0272#VF0272
orf02188	327	VFG001206(gb|NP_273675)	352	79/249(31.73)	2.5e-23	experimentally verified	VF0272	FbpABC	Neisseria meningitidis MC58	fbpC	iron(III) ABC transporter, ATP-binding protein	http://www.mgc.ac.cn/cgi-bin/VFs/vfs.cgi?VFID=VF0272#VF0272
orf02189	322	VFG001206(gb|NP_273675)	352	76/229(33.19)	1.13e-27	experimentally verified	VF0272	FbpABC	Neisseria meningitidis MC58	fbpC	iron(III) ABC transporter, ATP-binding protein	http://www.mgc.ac.cn/cgi-bin/VFs/vfs.cgi?VFID=VF0272#VF0272
orf02196	334	VFG037372(gb|YP_001847241)	322	73/277(26.35)	1.98e-08	experimentally verified	VF0467	Acinetobactin	Acinetobacter baumannii ACICU	bauB	ferric siderophore ABC transporter, periplasmic siderophore-binding protein	http://www.mgc.ac.cn/cgi-bin/VFs/vfs.cgi?VFID=VF0467#VF0467
orf02209	408	VFG049162(gb|YP_006635488.1)	501	70/263(26.62)	3.89e-18	experimentally verified	VF0573	Colibactin	Klebsiella pneumoniae subsp. pneumoniae 1084	clbP	precolibactin peptidase ClbP	http://www.mgc.ac.cn/cgi-bin/VFs/vfs.cgi?VFID=VF0573#VF0573
orf02216	163	VFG011439(gb|NP_540129)	235	43/126(34.13)	9.94e-06	experimentally verified	CVF383	LPS	Brucella melitensis bv. 1 str. 16M	lpxE	phosphatidylglycerophosphatase B	None
orf02218	233	VFG033025(gb|NP_463944)	466	69/210(32.86)	2.15e-31	experimentally verified	VF0442	PgdA	Listeria monocytogenes EGD-e	pdgA	Peptidoglycan N-deacetylase	http://www.mgc.ac.cn/cgi-bin/VFs/vfs.cgi?VFID=VF0442#VF0442
orf02233	458	VFG036956(gb|NP_273368)	508	75/306(24.51)	6.92e-13	experimentally verified	VF0450	FarAB	Neisseria meningitidis MC58	farB	fatty acid efflux system protein FarB	http://www.mgc.ac.cn/cgi-bin/VFs/vfs.cgi?VFID=VF0450#VF0450
orf02238	1057	VFG016355(gb|NP_831113)	760	37/99(37.37)	3.39e-11	experimentally verified	VF0585	IlsA	Bacillus cereus ATCC 14579	ilsA	InternalinNEAT domain-containing leucine-rich repeat protein	http://www.mgc.ac.cn/cgi-bin/VFs/vfs.cgi?VFID=VF0585#VF0585
orf02239	1528	VFG016355(gb|NP_831113)	760	33/100(33.00)	8.19e-10	experimentally verified	VF0585	IlsA	Bacillus cereus ATCC 14579	ilsA	InternalinNEAT domain-containing leucine-rich repeat protein	http://www.mgc.ac.cn/cgi-bin/VFs/vfs.cgi?VFID=VF0585#VF0585
orf02249	332	VFG013069(gb|YP_405014)	318	121/287(42.16)	4.61e-58	experimentally verified	VF0256	Shu	Shigella dysenteriae Sd197	shuU	permease of iron compound ABC transport system	http://www.mgc.ac.cn/cgi-bin/VFs/vfs.cgi?VFID=VF0256#VF0256
orf02250	262	VFG000925(gb|NP_752606)	271	88/248(35.48)	1.19e-51	experimentally verified	VF0228	Enterobactin	Escherichia coli CFT073	fepC	ferrienterobactin ABC transporter ATPase	http://www.mgc.ac.cn/cgi-bin/VFs/vfs.cgi?VFID=VF0228#VF0228
orf02251	339	VFG001321(gb|YP_001332078)	292	25/109(22.94)	5.87e-06	experimentally verified	VF0015	Isd	Staphylococcus aureus subsp. aureus str. Newman	isdE	iron-regulated surface determinant protein E	http://www.mgc.ac.cn/cgi-bin/VFs/vfs.cgi?VFID=VF0015#VF0015
orf02252	253	VFG000925(gb|NP_752606)	271	77/213(36.15)	4.01e-35	experimentally verified	VF0228	Enterobactin	Escherichia coli CFT073	fepC	ferrienterobactin ABC transporter ATPase	http://www.mgc.ac.cn/cgi-bin/VFs/vfs.cgi?VFID=VF0228#VF0228
orf02253	280	VFG037064(gb|NP_273631)	291	77/264(29.17)	9.58e-14	experimentally verified	VF0455	MntABC	Neisseria meningitidis MC58	mntB	Manganese transport system membrane protein MntB	http://www.mgc.ac.cn/cgi-bin/VFs/vfs.cgi?VFID=VF0455#VF0455
orf02254	332	VFG001330(gb|NP_688239)	306	133/330(40.30)	2.49e-64	experimentally verified	VF0275	Lmb	Streptococcus agalactiae 2603V/R	lmb	laminin-binding surface protein	http://www.mgc.ac.cn/cgi-bin/VFs/vfs.cgi?VFID=VF0275#VF0275
orf02255	108	VFG043206(gb|YP_001006774)	129	38/109(34.86)	3.38e-16	experimentally verified	AI145	peritrichous flagella	Yersinia enterocolitica subsp. enterocolitica 8081	cheY	chemotaxis regulatory protein CheY	None
orf02261	1121	VFG016355(gb|NP_831113)	760	54/215(25.12)	7.33e-17	experimentally verified	VF0585	IlsA	Bacillus cereus ATCC 14579	ilsA	InternalinNEAT domain-containing leucine-rich repeat protein	http://www.mgc.ac.cn/cgi-bin/VFs/vfs.cgi?VFID=VF0585#VF0585
orf02266	689	VFG005767(gb|NP_687682)	240	70/264(26.52)	9.05e-20	experimentally verified	CVF171	Beta-hemolysin/cytolysin	Streptococcus agalactiae 2603V/R	cylG	3-ketoacyl-ACP-reductase CylG	None
orf02273	368	VFG038234(gb|YP_001845365)	549	82/266(30.83)	5.32e-30	experimentally verified	VF0463	BfmRS	Acinetobacter baumannii ACICU	bfmS	signal transduction histidine kinase	http://www.mgc.ac.cn/cgi-bin/VFs/vfs.cgi?VFID=VF0463#VF0463
orf02274	236	VFG038219(gb|YP_001845364)	238	87/222(39.19)	1.01e-49	experimentally verified	VF0463	BfmRS	Acinetobacter baumannii ACICU	bfmR	biofilm-controlling response regulator	http://www.mgc.ac.cn/cgi-bin/VFs/vfs.cgi?VFID=VF0463#VF0463
orf02283	239	VFG002059(gb|NP_248763)	239	74/217(34.10)	3.64e-30	experimentally verified	VF0334	HSI-I	Pseudomonas aeruginosa PAO1	tagT	type six secretion associated protein TagT, ATP-binding component of ABC transporter	http://www.mgc.ac.cn/cgi-bin/VFs/vfs.cgi?VFID=VF0334#VF0334
orf02289	274	VFG000169(gb|NP_252919)	251	92/235(39.15)	1.56e-50	experimentally verified	VF0095	Pyochelin	Pseudomonas aeruginosa PAO1	pchC	pyochelin biosynthetic protein PchC	http://www.mgc.ac.cn/cgi-bin/VFs/vfs.cgi?VFID=VF0095#VF0095
orf02291	578	VFG013248(gb|NP_438233)	587	181/553(32.73)	1.32e-80	experimentally verified	CVF494	LOS	Haemophilus influenzae Rd KW20	msbA	lipid transporter ATP-binding/permease	None
orf02292	621	VFG013248(gb|NP_438233)	587	171/522(32.76)	7.78e-79	experimentally verified	CVF494	LOS	Haemophilus influenzae Rd KW20	msbA	lipid transporter ATP-binding/permease	None
orf02293	14130	VFG016041(gb|NP_251092)	5149	1981/6431(30.80)	0	experimentally verified	IA001	pyoverdine	Pseudomonas aeruginosa PAO1	pvdI	peptide synthase	None
orf02294	3726	VFG016041(gb|NP_251092)	5149	1275/3532(36.10)	0	experimentally verified	IA001	pyoverdine	Pseudomonas aeruginosa PAO1	pvdI	peptide synthase	None
orf02296	633	VFG049162(gb|YP_006635488.1)	501	82/339(24.19)	2.55e-10	experimentally verified	VF0573	Colibactin	Klebsiella pneumoniae subsp. pneumoniae 1084	clbP	precolibactin peptidase ClbP	http://www.mgc.ac.cn/cgi-bin/VFs/vfs.cgi?VFID=VF0573#VF0573
orf02307	223	VFG046938(gb|YP_169888.1)	239	45/130(34.62)	1.4e-09	experimentally verified	VF0542	LPS	Francisella tularensis subsp. tularensis SCHU S4	lpxE	phosphatase PAP2 family protei	http://www.mgc.ac.cn/cgi-bin/VFs/vfs.cgi?VFID=VF0542#VF0542
orf02308	216	VFG011439(gb|NP_540129)	235	26/73(35.62)	1.23e-09	experimentally verified	CVF383	LPS	Brucella melitensis bv. 1 str. 16M	lpxE	phosphatidylglycerophosphatase B	None
orf02309	237	VFG001386(gb|NP_215271)	247	93/233(39.91)	1.19e-53	experimentally verified	VF0286	PhoP	Mycobacterium tuberculosis H37Rv	phoP	Possible two component system response transcriptional positive regulator PhoP	http://www.mgc.ac.cn/cgi-bin/VFs/vfs.cgi?VFID=VF0286#VF0286
orf02310	458	VFG009810(gb|NP_215272)	485	89/288(30.90)	1.34e-27	experimentally verified	CVF331	PhoP/R	Mycobacterium tuberculosis H37Rv	phoR	Possible two component system response sensor kinase membrane associated PhoR	None
orf02311	157	VFG000070(gb|NP_464110)	482	44/116(37.93)	4.68e-18	experimentally verified	VF0068	p60	Listeria monocytogenes EGD-e	iap/cwhA	P60 extracellular protein, invasion associated protein Iap	http://www.mgc.ac.cn/cgi-bin/VFs/vfs.cgi?VFID=VF0068#VF0068
orf02312	344	VFG046763(gb|YP_169806.1)	337	43/138(31.16)	1.24e-07	experimentally verified	VF0543	Capsule	Francisella tularensis subsp. tularensis SCHU S4	FTT_0799	glycosyltransferase family 1 protein	http://www.mgc.ac.cn/cgi-bin/VFs/vfs.cgi?VFID=VF0543#VF0543
orf02314	452	VFG002363(gb|YP_001007255)	465	136/468(29.06)	1.27e-37	experimentally verified	VF0392	O-antigen	Yersinia enterocolitica subsp. enterocolitica 8081	manC	mannose-1-phosphate guanylyltransferase	http://www.mgc.ac.cn/cgi-bin/VFs/vfs.cgi?VFID=VF0392#VF0392
orf02318	259	VFG044172(gb|NP_756180)	266	67/250(26.80)	3.48e-24	experimentally verified	VF0227	Chu	Escherichia coli CFT073	chuV	ATP-binding hydrophilic protein ChuV	http://www.mgc.ac.cn/cgi-bin/VFs/vfs.cgi?VFID=VF0227#VF0227
orf02327	254	VFG039536(gb|NP_820549)	244	102/237(43.04)	7.64e-50	experimentally verified	CVF803	T4SS effectors	Coxiella burnetii RSA 493	CBU_1566	Coxiella Dot/Icm type IVB secretion system translocated effector	None
orf02336	195	VFG001306(gb|NP_644948)	185	39/94(41.49)	2.14e-16	experimentally verified	VF0003	Capsule	Staphylococcus aureus subsp. aureus MW2	cap8J	capsular polysaccharide synthesis enzyme Cap8J	http://www.mgc.ac.cn/cgi-bin/VFs/vfs.cgi?VFID=VF0003#VF0003
orf02345	327	VFG000924(gb|NP_752610)	318	51/196(26.02)	2.52e-07	experimentally verified	VF0228	Enterobactin	Escherichia coli CFT073	fepB	ferrienterobactin ABC transporter periplasmic binding protein	http://www.mgc.ac.cn/cgi-bin/VFs/vfs.cgi?VFID=VF0228#VF0228
orf02346	341	VFG000922(gb|NP_756179)	330	107/314(34.08)	1.54e-54	experimentally verified	VF0227	Chu	Escherichia coli CFT073	chuU	heme permease protein ChuU	http://www.mgc.ac.cn/cgi-bin/VFs/vfs.cgi?VFID=VF0227#VF0227
orf02347	335	VFG013069(gb|YP_405014)	318	103/281(36.65)	3.56e-46	experimentally verified	VF0256	Shu	Shigella dysenteriae Sd197	shuU	permease of iron compound ABC transport system	http://www.mgc.ac.cn/cgi-bin/VFs/vfs.cgi?VFID=VF0256#VF0256
orf02361	406	VFG040865(gb|YP_028299)	90	28/87(32.18)	2.54e-09	experimentally verified	VF0581	T7SS	Bacillus anthracis str. Sterne	esxB	type VII secretion system protein EsxB	http://www.mgc.ac.cn/cgi-bin/VFs/vfs.cgi?VFID=VF0581#VF0581
orf02366	194	VFG000077(gb|NP_465991)	198	119/187(63.64)	1.94e-85	experimentally verified	VF0074	ClpP	Listeria monocytogenes EGD-e	clpP	ATP-dependent Clp protease proteolytic subunit	http://www.mgc.ac.cn/cgi-bin/VFs/vfs.cgi?VFID=VF0074#VF0074
orf02379	653	VFG000104(gb|NP_230488)	626	141/594(23.74)	7.28e-28	experimentally verified	VF0127	ACF	Vibrio cholerae O1 biovar El Tor str. N16961	acfB	accessory colonization factor AcfB, methyl-accepting chemoreceptor	http://www.mgc.ac.cn/cgi-bin/VFs/vfs.cgi?VFID=VF0127#VF0127
orf02380	854	VFG009810(gb|NP_215272)	485	74/257(28.79)	2.93e-14	experimentally verified	CVF331	PhoP/R	Mycobacterium tuberculosis H37Rv	phoR	Possible two component system response sensor kinase membrane associated PhoR	None
orf02381	230	VFG038219(gb|YP_001845364)	238	77/230(33.48)	2.6e-42	experimentally verified	VF0463	BfmRS	Acinetobacter baumannii ACICU	bfmR	biofilm-controlling response regulator	http://www.mgc.ac.cn/cgi-bin/VFs/vfs.cgi?VFID=VF0463#VF0463
orf02382	420	VFG016046(gb|NP_251103)	469	159/421(37.77)	6.49e-89	experimentally verified	IA001	pyoverdine	Pseudomonas aeruginosa PAO1	pvdH	diaminobutyrate-2-oxoglutarate aminotransferase PvdH	None
orf02384	374	VFG045467(gb|YP_107884)	580	40/165(24.24)	6.79e-08	experimentally verified	VF0432	CdpA	Burkholderia pseudomallei K96243	cdpA	cyclic di-GMP phosphodiesterase	http://www.mgc.ac.cn/cgi-bin/VFs/vfs.cgi?VFID=VF0432#VF0432
orf02385	811	VFG002219(gb|NP_540754)	2867	228/774(29.46)	2.53e-93	experimentally verified	VF0366	C<beta>G	Brucella melitensis bv. 1 str. 16M	cgs	cyclic beta 1-2 glucan synthetase	http://www.mgc.ac.cn/cgi-bin/VFs/vfs.cgi?VFID=VF0366#VF0366
orf02387	244	VFG050116(gb|YP_002336036.1)	237	86/230(37.39)	7.15e-52	experimentally verified	VF0583	Cereulide	Bacillus cereus AH187	cesT	type II thioesterase, CesT	http://www.mgc.ac.cn/cgi-bin/VFs/vfs.cgi?VFID=VF0583#VF0583
orf02397	529	VFG050017(gb|NP_832067.1)	538	137/493(27.79)	9.32e-45	experimentally verified	VF0586	Bacillibactin	Bacillus cereus ATCC 14579	dhbE	2,3-dihydroxybenzoate adenylase DhbE	http://www.mgc.ac.cn/cgi-bin/VFs/vfs.cgi?VFID=VF0586#VF0586
orf02416	332	VFG002197(gb|NP_814691)	336	93/343(27.11)	1.65e-20	experimentally verified	VF0362	BopD	Enterococcus faecalis V583	bopD	sugar-binding transcriptional regulator, LacI family	http://www.mgc.ac.cn/cgi-bin/VFs/vfs.cgi?VFID=VF0362#VF0362
orf02417	603	VFG000120(gb|NP_253949)	358	65/234(27.78)	2.55e-18	experimentally verified	VF0091	Alginate	Pseudomonas aeruginosa PAO1	algZ	sigma factor AlgU	http://www.mgc.ac.cn/cgi-bin/VFs/vfs.cgi?VFID=VF0091#VF0091
orf02418	368	VFG000119(gb|NP_253948)	248	41/116(35.34)	1.2e-14	experimentally verified	VF0091	Alginate	Pseudomonas aeruginosa PAO1	algR	alginate biosynthesis regulatory protein AlgR	http://www.mgc.ac.cn/cgi-bin/VFs/vfs.cgi?VFID=VF0091#VF0091
orf02424	354	VFG000038(gb|NP_878995)	350	86/360(23.89)	2.6e-15	experimentally verified	VF0033	LPS	Bordetella pertussis Tohama I	bplA	probable oxidoreductase	http://www.mgc.ac.cn/cgi-bin/VFs/vfs.cgi?VFID=VF0033#VF0033
orf02430	264	VFG005767(gb|NP_687682)	240	78/258(30.23)	1.22e-24	experimentally verified	CVF171	Beta-hemolysin/cytolysin	Streptococcus agalactiae 2603V/R	cylG	3-ketoacyl-ACP-reductase CylG	None
orf02431	461	VFG036956(gb|NP_273368)	508	91/343(26.53)	4.83e-25	experimentally verified	VF0450	FarAB	Neisseria meningitidis MC58	farB	fatty acid efflux system protein FarB	http://www.mgc.ac.cn/cgi-bin/VFs/vfs.cgi?VFID=VF0450#VF0450
orf02432	295	VFG044083(gb|NP_250948)	312	43/136(31.62)	4.28e-10	experimentally verified	IA001	pyoverdine	Pseudomonas aeruginosa PAO1	ptxR	transcriptional regulator PtxR	None
orf02433	457	VFG036956(gb|NP_273368)	508	94/413(22.76)	3.91e-13	experimentally verified	VF0450	FarAB	Neisseria meningitidis MC58	farB	fatty acid efflux system protein FarB	http://www.mgc.ac.cn/cgi-bin/VFs/vfs.cgi?VFID=VF0450#VF0450
orf02434	354	VFG033025(gb|NP_463944)	466	64/177(36.16)	2.12e-30	experimentally verified	VF0442	PgdA	Listeria monocytogenes EGD-e	pdgA	Peptidoglycan N-deacetylase	http://www.mgc.ac.cn/cgi-bin/VFs/vfs.cgi?VFID=VF0442#VF0442
orf02436	334	VFG002197(gb|NP_814691)	336	91/340(26.76)	8.5e-30	experimentally verified	VF0362	BopD	Enterococcus faecalis V583	bopD	sugar-binding transcriptional regulator, LacI family	http://www.mgc.ac.cn/cgi-bin/VFs/vfs.cgi?VFID=VF0362#VF0362
orf02439	227	VFG001386(gb|NP_215271)	247	85/224(37.95)	1.5e-54	experimentally verified	VF0286	PhoP	Mycobacterium tuberculosis H37Rv	phoP	Possible two component system response transcriptional positive regulator PhoP	http://www.mgc.ac.cn/cgi-bin/VFs/vfs.cgi?VFID=VF0286#VF0286
orf02441	273	VFG038332(gb|YP_001144282)	271	27/98(27.55)	2.03e-06	experimentally verified	VF0479	T3SS	Aeromonas salmonicida subsp. salmonicida A449	exsA	Type III secretion system transcriptional regulator	http://www.mgc.ac.cn/cgi-bin/VFs/vfs.cgi?VFID=VF0479#VF0479
orf02448	184	VFG045514(gb|YP_095180)	167	21/49(42.86)	6.61e-06	experimentally verified	VF0156	Dot/Icm	Legionella pneumophila subsp. pneumophila str. Philadelphia 1	lpg1147	Dot/Icm type IV secretion system effector	http://www.mgc.ac.cn/cgi-bin/VFs/vfs.cgi?VFID=VF0156#VF0156
orf02452	412	VFG016046(gb|NP_251103)	469	122/409(29.83)	1.46e-48	experimentally verified	IA001	pyoverdine	Pseudomonas aeruginosa PAO1	pvdH	diaminobutyrate-2-oxoglutarate aminotransferase PvdH	None
orf02454	253	VFG049995(gb|NP_832065.1)	261	80/258(31.01)	4.81e-28	experimentally verified	VF0586	Bacillibactin	Bacillus cereus ATCC 14579	dhbA	2,3-dihydroxybenzoate-2,3-dehydrogenase, DhbA	http://www.mgc.ac.cn/cgi-bin/VFs/vfs.cgi?VFID=VF0586#VF0586
orf02458	284	VFG005767(gb|NP_687682)	240	79/269(29.37)	3.61e-24	experimentally verified	CVF171	Beta-hemolysin/cytolysin	Streptococcus agalactiae 2603V/R	cylG	3-ketoacyl-ACP-reductase CylG	None
orf02459	270	VFG007177(gb|NP_798078)	286	40/166(24.10)	1.9e-08	experimentally verified	VF0408	T3SS1	Vibrio parahaemolyticus RIMD 2210633	exsA	transcriptional regulator ExsA	http://www.mgc.ac.cn/cgi-bin/VFs/vfs.cgi?VFID=VF0408#VF0408
orf02464	173	VFG039386(gb|NP_819821)	145	23/76(30.26)	3.45e-07	experimentally verified	SS051	Dot/Icm	Coxiella burnetii RSA 493	coxH2	Coxiella Dot/Icm type IVB secretion system translocated effector	None
orf02465	722	VFG049158(gb|YP_006635484.1)	487	67/203(33.00)	2.85e-19	experimentally verified	VF0573	Colibactin	Klebsiella pneumoniae subsp. pneumoniae 1084	clbL	colibactin biosynthesis amidase ClbL	http://www.mgc.ac.cn/cgi-bin/VFs/vfs.cgi?VFID=VF0573#VF0573
orf02476	589	VFG013248(gb|NP_438233)	587	150/522(28.74)	1.31e-60	experimentally verified	CVF494	LOS	Haemophilus influenzae Rd KW20	msbA	lipid transporter ATP-binding/permease	None
orf02477	616	VFG013248(gb|NP_438233)	587	166/502(33.07)	6.08e-82	experimentally verified	CVF494	LOS	Haemophilus influenzae Rd KW20	msbA	lipid transporter ATP-binding/permease	None
orf02478	255	VFG049118(gb|YP_002918201.1)	272	55/233(23.61)	5.54e-17	experimentally verified	VF0572	Allantion utilization	Klebsiella pneumoniae subsp. pneumoniae NTUH-K2044	allR	DNA-binding transcriptional repressor AllR	http://www.mgc.ac.cn/cgi-bin/VFs/vfs.cgi?VFID=VF0572#VF0572
orf02479	229	VFG011668(gb|NP_282558)	200	46/161(28.57)	7.69e-06	experimentally verified	CVF393	Capsule biosynthesis and transport	Campylobacter jejuni subsp. jejuni NCTC 11168	Cj1417c	amidotransferase	None
orf02481	14075	VFG016041(gb|NP_251092)	5149	1931/5798(33.30)	0	experimentally verified	IA001	pyoverdine	Pseudomonas aeruginosa PAO1	pvdI	peptide synthase	None
orf02490	680	VFG049162(gb|YP_006635488.1)	501	71/320(22.19)	1.5e-09	experimentally verified	VF0573	Colibactin	Klebsiella pneumoniae subsp. pneumoniae 1084	clbP	precolibactin peptidase ClbP	http://www.mgc.ac.cn/cgi-bin/VFs/vfs.cgi?VFID=VF0573#VF0573
orf02491	335	VFG002197(gb|NP_814691)	336	91/337(27.00)	8.3e-23	experimentally verified	VF0362	BopD	Enterococcus faecalis V583	bopD	sugar-binding transcriptional regulator, LacI family	http://www.mgc.ac.cn/cgi-bin/VFs/vfs.cgi?VFID=VF0362#VF0362
orf02494	334	VFG002197(gb|NP_814691)	336	100/337(29.67)	1.11e-37	experimentally verified	VF0362	BopD	Enterococcus faecalis V583	bopD	sugar-binding transcriptional regulator, LacI family	http://www.mgc.ac.cn/cgi-bin/VFs/vfs.cgi?VFID=VF0362#VF0362
orf02498	322	VFG002197(gb|NP_814691)	336	87/312(27.88)	3.32e-28	experimentally verified	VF0362	BopD	Enterococcus faecalis V583	bopD	sugar-binding transcriptional regulator, LacI family	http://www.mgc.ac.cn/cgi-bin/VFs/vfs.cgi?VFID=VF0362#VF0362
orf02511	339	VFG038234(gb|YP_001845365)	549	71/259(27.41)	7.02e-21	experimentally verified	VF0463	BfmRS	Acinetobacter baumannii ACICU	bfmS	signal transduction histidine kinase	http://www.mgc.ac.cn/cgi-bin/VFs/vfs.cgi?VFID=VF0463#VF0463
orf02512	225	VFG038219(gb|YP_001845364)	238	72/228(31.58)	1.23e-30	experimentally verified	VF0463	BfmRS	Acinetobacter baumannii ACICU	bfmR	biofilm-controlling response regulator	http://www.mgc.ac.cn/cgi-bin/VFs/vfs.cgi?VFID=VF0463#VF0463
orf02517	156	VFG049995(gb|NP_832065.1)	261	39/130(30.00)	6.61e-16	experimentally verified	VF0586	Bacillibactin	Bacillus cereus ATCC 14579	dhbA	2,3-dihydroxybenzoate-2,3-dehydrogenase, DhbA	http://www.mgc.ac.cn/cgi-bin/VFs/vfs.cgi?VFID=VF0586#VF0586
orf02518	2879	VFG002548(gb|YP_109384)	2546	434/1190(36.47)	2.37e-212	experimentally verified	VF0436	Capsule I	Burkholderia pseudomallei K96243	wcbR	capsular polysaccharide biosynthesis fatty acid synthase	http://www.mgc.ac.cn/cgi-bin/VFs/vfs.cgi?VFID=VF0436#VF0436
orf02519	5772	VFG016041(gb|NP_251092)	5149	1573/5173(30.41)	0	experimentally verified	IA001	pyoverdine	Pseudomonas aeruginosa PAO1	pvdI	peptide synthase	None
orf02520	3369	VFG016041(gb|NP_251092)	5149	1103/3668(30.07)	0	experimentally verified	IA001	pyoverdine	Pseudomonas aeruginosa PAO1	pvdI	peptide synthase	None
orf02521	240	VFG050116(gb|YP_002336036.1)	237	90/234(38.46)	2.17e-55	experimentally verified	VF0583	Cereulide	Bacillus cereus AH187	cesT	type II thioesterase, CesT	http://www.mgc.ac.cn/cgi-bin/VFs/vfs.cgi?VFID=VF0583#VF0583
orf02525	390	VFG001965(gb|NP_282578)	367	74/352(21.02)	1.33e-09	experimentally verified	VF0323	Capsule	Campylobacter jejuni subsp. jejuni NCTC 11168	Cj1437c	aminotransferase	http://www.mgc.ac.cn/cgi-bin/VFs/vfs.cgi?VFID=VF0323#VF0323
orf02528	248	VFG038839(gb|YP_858598)	249	69/198(34.85)	5.33e-24	experimentally verified	CVF786	Polar flagella	Aeromonas hydrophila subsp. hydrophila ATCC 7966	flmH	short chain dehydrogenase/reductase family oxidoreductase	None
orf02537	293	VFG044083(gb|NP_250948)	312	38/120(31.67)	1.02e-09	experimentally verified	IA001	pyoverdine	Pseudomonas aeruginosa PAO1	ptxR	transcriptional regulator PtxR	None
orf02539	407	VFG044196(gb|YP_169102)	396	106/393(26.97)	4.07e-29	experimentally verified	VF0551	Rhizoferrin	Francisella tularensis subsp. tularensis SCHU S4	fslD	MFS transporter, inner membrane protein responsible for uptake of the ferric-siderophore complex	http://www.mgc.ac.cn/cgi-bin/VFs/vfs.cgi?VFID=VF0551#VF0551
orf02546	278	VFG007177(gb|NP_798078)	286	29/104(27.88)	4.65e-09	experimentally verified	VF0408	T3SS1	Vibrio parahaemolyticus RIMD 2210633	exsA	transcriptional regulator ExsA	http://www.mgc.ac.cn/cgi-bin/VFs/vfs.cgi?VFID=VF0408#VF0408
orf02550	71	VFG050113(gb|YP_002336033.1)	291	28/53(52.83)	4.57e-14	experimentally verified	VF0583	Cereulide	Bacillus cereus AH187	cesC	ABC transporter ATP-binding protein, CesC	http://www.mgc.ac.cn/cgi-bin/VFs/vfs.cgi?VFID=VF0583#VF0583
orf02552	351	VFG038234(gb|YP_001845365)	549	72/250(28.80)	4.29e-22	experimentally verified	VF0463	BfmRS	Acinetobacter baumannii ACICU	bfmS	signal transduction histidine kinase	http://www.mgc.ac.cn/cgi-bin/VFs/vfs.cgi?VFID=VF0463#VF0463
orf02553	231	VFG001386(gb|NP_215271)	247	81/228(35.53)	6.1e-43	experimentally verified	VF0286	PhoP	Mycobacterium tuberculosis H37Rv	phoP	Possible two component system response transcriptional positive regulator PhoP	http://www.mgc.ac.cn/cgi-bin/VFs/vfs.cgi?VFID=VF0286#VF0286
orf02561	468	VFG043402(gb|YP_002344511)	130	40/121(33.06)	8.59e-10	experimentally verified	AI151	Pse5Ac7Ac, Pse5Ac7Am, Pse8OAc, Pse5Am7AcGlnAc	Campylobacter jejuni subsp. jejuni NCTC 11168	cheY	chemotaxis regulatory protein	None
orf02562	568	VFG000120(gb|NP_253949)	358	51/200(25.50)	2.57e-14	experimentally verified	VF0091	Alginate	Pseudomonas aeruginosa PAO1	algZ	sigma factor AlgU	http://www.mgc.ac.cn/cgi-bin/VFs/vfs.cgi?VFID=VF0091#VF0091
orf02576	399	VFG012513(gb|NP_753168)	387	78/366(21.31)	4.78e-11	experimentally verified	IA013	Salmochelin	Escherichia coli CFT073	iroB	glucosyltransferase IroB	None
orf02577	796	VFG002196(gb|NP_816637)	1372	34/111(30.63)	4.34e-08	experimentally verified	VF0359	Hyaluronidase	Enterococcus faecalis V583	EF3023	polysaccharide lyase, family 8	http://www.mgc.ac.cn/cgi-bin/VFs/vfs.cgi?VFID=VF0359#VF0359
orf02584	583	VFG000120(gb|NP_253949)	358	50/198(25.25)	1.05e-08	experimentally verified	VF0091	Alginate	Pseudomonas aeruginosa PAO1	algZ	sigma factor AlgU	http://www.mgc.ac.cn/cgi-bin/VFs/vfs.cgi?VFID=VF0091#VF0091
orf02585	536	VFG000119(gb|NP_253948)	248	39/116(33.62)	7.87e-14	experimentally verified	VF0091	Alginate	Pseudomonas aeruginosa PAO1	algR	alginate biosynthesis regulatory protein AlgR	http://www.mgc.ac.cn/cgi-bin/VFs/vfs.cgi?VFID=VF0091#VF0091
orf02590	368	VFG000038(gb|NP_878995)	350	69/301(22.92)	1.02e-13	experimentally verified	VF0033	LPS	Bordetella pertussis Tohama I	bplA	probable oxidoreductase	http://www.mgc.ac.cn/cgi-bin/VFs/vfs.cgi?VFID=VF0033#VF0033
orf02592	390	VFG000038(gb|NP_878995)	350	88/379(23.22)	6.84e-24	experimentally verified	VF0033	LPS	Bordetella pertussis Tohama I	bplA	probable oxidoreductase	http://www.mgc.ac.cn/cgi-bin/VFs/vfs.cgi?VFID=VF0033#VF0033
orf02603	235	VFG005776(gb|NP_687685)	309	75/194(38.66)	1.08e-34	experimentally verified	CVF171	Beta-hemolysin/cytolysin	Streptococcus agalactiae 2603V/R	cylA	ABC (ATP-binding cassette) transporter CylA	None
orf02606	219	VFG038219(gb|YP_001845364)	238	75/221(33.94)	6.25e-33	experimentally verified	VF0463	BfmRS	Acinetobacter baumannii ACICU	bfmR	biofilm-controlling response regulator	http://www.mgc.ac.cn/cgi-bin/VFs/vfs.cgi?VFID=VF0463#VF0463
orf02607	462	VFG038234(gb|YP_001845365)	549	83/316(26.27)	8.72e-17	experimentally verified	VF0463	BfmRS	Acinetobacter baumannii ACICU	bfmS	signal transduction histidine kinase	http://www.mgc.ac.cn/cgi-bin/VFs/vfs.cgi?VFID=VF0463#VF0463
orf02608	445	VFG036956(gb|NP_273368)	508	77/333(23.12)	8.26e-12	experimentally verified	VF0450	FarAB	Neisseria meningitidis MC58	farB	fatty acid efflux system protein FarB	http://www.mgc.ac.cn/cgi-bin/VFs/vfs.cgi?VFID=VF0450#VF0450
orf02617	469	VFG036956(gb|NP_273368)	508	86/311(27.65)	3.08e-24	experimentally verified	VF0450	FarAB	Neisseria meningitidis MC58	farB	fatty acid efflux system protein FarB	http://www.mgc.ac.cn/cgi-bin/VFs/vfs.cgi?VFID=VF0450#VF0450
orf02622	278	VFG000344(gb|NP_438273)	351	77/277(27.80)	1.17e-21	experimentally verified	VF0268	HitABC	Haemophilus influenzae Rd KW20	hitC	iron(III) ABC transporter, ATP-binding protein	http://www.mgc.ac.cn/cgi-bin/VFs/vfs.cgi?VFID=VF0268#VF0268
orf02623	280	VFG001206(gb|NP_273675)	352	78/221(35.29)	4.49e-33	experimentally verified	VF0272	FbpABC	Neisseria meningitidis MC58	fbpC	iron(III) ABC transporter, ATP-binding protein	http://www.mgc.ac.cn/cgi-bin/VFs/vfs.cgi?VFID=VF0272#VF0272
orf02625	485	VFG037028(gb|NP_273273)	504	263/478(55.02)	2.89e-192	experimentally verified	VF0454	KatA	Neisseria meningitidis MC58	katA	catalase	http://www.mgc.ac.cn/cgi-bin/VFs/vfs.cgi?VFID=VF0454#VF0454
orf02626	200	VFG001988(gb|NP_282556)	170	55/166(33.13)	2.49e-22	experimentally verified	VF0323	Capsule	Campylobacter jejuni subsp. jejuni NCTC 11168	cysC	adenylylsulfate kinase	http://www.mgc.ac.cn/cgi-bin/VFs/vfs.cgi?VFID=VF0323#VF0323
orf02631	93	VFG016041(gb|NP_251092)	5149	34/72(47.22)	2.03e-18	experimentally verified	IA001	pyoverdine	Pseudomonas aeruginosa PAO1	pvdI	peptide synthase	None
orf02648	335	VFG047512(gb|YP_169930.1)	313	101/294(34.35)	6.41e-54	experimentally verified	VF0552	Biotin synthesis	Francisella tularensis subsp. tularensis SCHU S4	bioB	biotin synthase	http://www.mgc.ac.cn/cgi-bin/VFs/vfs.cgi?VFID=VF0552#VF0552
orf02649	433	VFG038900(gb|YP_857314)	439	103/426(24.18)	7.53e-36	experimentally verified	CVF792	Hemolysin HlyA	Aeromonas hydrophila subsp. hydrophila ATCC 7966	hlyA	Hemolysin A	None
orf02652	249	VFG005767(gb|NP_687682)	240	77/239(32.22)	3.38e-35	experimentally verified	CVF171	Beta-hemolysin/cytolysin	Streptococcus agalactiae 2603V/R	cylG	3-ketoacyl-ACP-reductase CylG	None
orf02661	574	VFG000365(gb|NP_405474)	600	182/523(34.80)	8.43e-92	experimentally verified	VF0136	Yersiniabactin	Yersinia pestis CO92	ybtP	yersiniabactin ABC transporter ATP-binding/permease protein YbtP	http://www.mgc.ac.cn/cgi-bin/VFs/vfs.cgi?VFID=VF0136#VF0136
orf02662	612	VFG000365(gb|NP_405474)	600	197/534(36.89)	2.53e-95	experimentally verified	VF0136	Yersiniabactin	Yersinia pestis CO92	ybtP	yersiniabactin ABC transporter ATP-binding/permease protein YbtP	http://www.mgc.ac.cn/cgi-bin/VFs/vfs.cgi?VFID=VF0136#VF0136
orf02663	329	VFG044327(gb|YP_002920247)	319	48/143(33.57)	1.96e-21	experimentally verified	VF0564	Ybt	Klebsiella pneumoniae subsp. pneumoniae NTUH-K2044	ybtA	yersiniabactin transcriptional regulator YbtA	http://www.mgc.ac.cn/cgi-bin/VFs/vfs.cgi?VFID=VF0564#VF0564
orf02669	318	VFG000872(gb|NP_757240)	198	50/176(28.41)	2.59e-12	experimentally verified	VF0221	Type 1 fimbriae	Escherichia coli CFT073	fimE	Type 1 fimbriae Regulatory protein fimE	http://www.mgc.ac.cn/cgi-bin/VFs/vfs.cgi?VFID=VF0221#VF0221
orf02674	348	VFG013069(gb|YP_405014)	318	109/318(34.28)	7.54e-54	experimentally verified	VF0256	Shu	Shigella dysenteriae Sd197	shuU	permease of iron compound ABC transport system	http://www.mgc.ac.cn/cgi-bin/VFs/vfs.cgi?VFID=VF0256#VF0256
orf02675	354	VFG048468(gb|YP_002918373.1)	335	132/317(41.64)	3.59e-65	experimentally verified	VF0562	Ent	Klebsiella pneumoniae subsp. pneumoniae NTUH-K2044	fepD	iron-enterobactin transporter membrane protein	http://www.mgc.ac.cn/cgi-bin/VFs/vfs.cgi?VFID=VF0562#VF0562
orf02676	326	VFG037372(gb|YP_001847241)	322	56/190(29.47)	3.29e-09	experimentally verified	VF0467	Acinetobactin	Acinetobacter baumannii ACICU	bauB	ferric siderophore ABC transporter, periplasmic siderophore-binding protein	http://www.mgc.ac.cn/cgi-bin/VFs/vfs.cgi?VFID=VF0467#VF0467
orf02677	571	VFG013248(gb|NP_438233)	587	184/570(32.28)	8.82e-95	experimentally verified	CVF494	LOS	Haemophilus influenzae Rd KW20	msbA	lipid transporter ATP-binding/permease	None
orf02678	335	VFG037372(gb|YP_001847241)	322	61/271(22.51)	6.29e-06	experimentally verified	VF0467	Acinetobactin	Acinetobacter baumannii ACICU	bauB	ferric siderophore ABC transporter, periplasmic siderophore-binding protein	http://www.mgc.ac.cn/cgi-bin/VFs/vfs.cgi?VFID=VF0467#VF0467
orf02681	493	VFG001206(gb|NP_273675)	352	69/222(31.08)	4.06e-24	experimentally verified	VF0272	FbpABC	Neisseria meningitidis MC58	fbpC	iron(III) ABC transporter, ATP-binding protein	http://www.mgc.ac.cn/cgi-bin/VFs/vfs.cgi?VFID=VF0272#VF0272
orf02683	292	VFG000331(gb|NP_439675)	476	78/292(26.71)	2.52e-10	experimentally verified	VF0044	LOS	Haemophilus influenzae Rd KW20	rfaE	ADP-heptose synthase	http://www.mgc.ac.cn/cgi-bin/VFs/vfs.cgi?VFID=VF0044#VF0044
orf02684	342	VFG002197(gb|NP_814691)	336	90/346(26.01)	1.74e-22	experimentally verified	VF0362	BopD	Enterococcus faecalis V583	bopD	sugar-binding transcriptional regulator, LacI family	http://www.mgc.ac.cn/cgi-bin/VFs/vfs.cgi?VFID=VF0362#VF0362
orf02686	262	VFG005767(gb|NP_687682)	240	80/255(31.37)	2.45e-35	experimentally verified	CVF171	Beta-hemolysin/cytolysin	Streptococcus agalactiae 2603V/R	cylG	3-ketoacyl-ACP-reductase CylG	None
orf02705	268	VFG033025(gb|NP_463944)	466	70/189(37.04)	1.31e-38	experimentally verified	VF0442	PgdA	Listeria monocytogenes EGD-e	pdgA	Peptidoglycan N-deacetylase	http://www.mgc.ac.cn/cgi-bin/VFs/vfs.cgi?VFID=VF0442#VF0442
orf02706	222	VFG000070(gb|NP_464110)	482	29/85(34.12)	4.16e-06	experimentally verified	VF0068	p60	Listeria monocytogenes EGD-e	iap/cwhA	P60 extracellular protein, invasion associated protein Iap	http://www.mgc.ac.cn/cgi-bin/VFs/vfs.cgi?VFID=VF0068#VF0068
orf02707	240	VFG000344(gb|NP_438273)	351	77/239(32.22)	8.43e-44	experimentally verified	VF0268	HitABC	Haemophilus influenzae Rd KW20	hitC	iron(III) ABC transporter, ATP-binding protein	http://www.mgc.ac.cn/cgi-bin/VFs/vfs.cgi?VFID=VF0268#VF0268
orf02708	487	VFG001983(gb|NP_282073)	259	60/222(27.03)	2.83e-12	experimentally verified	VF0327	PEB1	Campylobacter jejuni subsp. jejuni NCTC 11168	pebA	bifunctional adhesin/ABC transporter aspartate/glutamate-binding protein	http://www.mgc.ac.cn/cgi-bin/VFs/vfs.cgi?VFID=VF0327#VF0327
orf02713	408	VFG047039(gb|YP_170388.1)	294	65/254(25.59)	2.21e-12	experimentally verified	VF0542	LPS	Francisella tularensis subsp. tularensis SCHU S4	wbtL	glucose-1-phosphate thymidylyltransferase	http://www.mgc.ac.cn/cgi-bin/VFs/vfs.cgi?VFID=VF0542#VF0542
orf02714	476	VFG009810(gb|NP_215272)	485	100/315(31.75)	3.74e-30	experimentally verified	CVF331	PhoP/R	Mycobacterium tuberculosis H37Rv	phoR	Possible two component system response sensor kinase membrane associated PhoR	None
orf02715	226	VFG001386(gb|NP_215271)	247	85/219(38.81)	3.34e-47	experimentally verified	VF0286	PhoP	Mycobacterium tuberculosis H37Rv	phoP	Possible two component system response transcriptional positive regulator PhoP	http://www.mgc.ac.cn/cgi-bin/VFs/vfs.cgi?VFID=VF0286#VF0286
orf02717	241	VFG037386(gb|YP_001847242)	256	68/245(27.76)	1.32e-25	experimentally verified	VF0467	Acinetobactin	Acinetobacter baumannii ACICU	bauE	ferric siderophore ABC transporter, ATP-binding protein BauE	http://www.mgc.ac.cn/cgi-bin/VFs/vfs.cgi?VFID=VF0467#VF0467
orf02729	244	VFG048508(gb|YP_002918368.1)	402	48/231(20.78)	2e-07	experimentally verified	VF0562	Ent	Klebsiella pneumoniae subsp. pneumoniae NTUH-K2044	fes	enterobactin/ferric enterobactin esterase	http://www.mgc.ac.cn/cgi-bin/VFs/vfs.cgi?VFID=VF0562#VF0562
orf02730	154	VFG048962(gb|YP_002920365.1)	144	47/152(30.92)	1.9e-15	experimentally verified	VF0560	Capsule	Klebsiella pneumoniae subsp. pneumoniae NTUH-K2044	wzb	protein tyrosine phosphatase	http://www.mgc.ac.cn/cgi-bin/VFs/vfs.cgi?VFID=VF0560#VF0560
orf02732	166	VFG000070(gb|NP_464110)	482	42/121(34.71)	2.87e-17	experimentally verified	VF0068	p60	Listeria monocytogenes EGD-e	iap/cwhA	P60 extracellular protein, invasion associated protein Iap	http://www.mgc.ac.cn/cgi-bin/VFs/vfs.cgi?VFID=VF0068#VF0068
orf02733	230	VFG001386(gb|NP_215271)	247	63/225(28.00)	1.71e-24	experimentally verified	VF0286	PhoP	Mycobacterium tuberculosis H37Rv	phoP	Possible two component system response transcriptional positive regulator PhoP	http://www.mgc.ac.cn/cgi-bin/VFs/vfs.cgi?VFID=VF0286#VF0286
orf02739	517	VFG045332(gb|AHK25017)	295	54/168(32.14)	7.72e-13	experimentally verified	VF0410	LLS	Listeria innocua SLCC6294	llsG	ABC transporter ATP-binding protein LlsG	http://www.mgc.ac.cn/cgi-bin/VFs/vfs.cgi?VFID=VF0410#VF0410
orf02747	612	VFG038532(gb|YP_855994)	437	80/286(27.97)	4.31e-13	experimentally verified	CVF784	Flp type IV pili	Aeromonas hydrophila subsp. hydrophila ATCC 7966	flpF	traffic ATPase	None
orf02751	497	VFG002060(gb|NP_248764)	1032	89/266(33.46)	8.97e-23	experimentally verified	VF0334	HSI-I	Pseudomonas aeruginosa PAO1	ppkA	serine/threonine protein kinase PpkA	http://www.mgc.ac.cn/cgi-bin/VFs/vfs.cgi?VFID=VF0334#VF0334
orf02753	257	VFG048488(gb|YP_002918371.1)	264	66/233(28.33)	4.04e-28	experimentally verified	VF0562	Ent	Klebsiella pneumoniae subsp. pneumoniae NTUH-K2044	fepC	iron-enterobactin transporter ATP-binding protein	http://www.mgc.ac.cn/cgi-bin/VFs/vfs.cgi?VFID=VF0562#VF0562
orf02779	293	VFG013471(gb|NP_439724)	323	97/319(30.41)	5.23e-40	experimentally verified	CVF494	LOS	Haemophilus influenzae Rd KW20	lgtA	N-acetylglucosamine glycosyltransferase	None
orf02808	495	VFG002176(gb|AAM75252)	714	56/189(29.63)	2.96e-15	experimentally verified	VF0356	Cytolysin	Enterococcus faecalis str. MMH594	cylB	ABC-type transporter	http://www.mgc.ac.cn/cgi-bin/VFs/vfs.cgi?VFID=VF0356#VF0356
orf02811	555	VFG000421(gb|NP_395427.1)	307	29/103(28.16)	9.76e-06	experimentally verified	VF0138	F1 antigen	Yersinia pestis CO92	caf1R	F1 operon positive regulatory protein	http://www.mgc.ac.cn/cgi-bin/VFs/vfs.cgi?VFID=VF0138#VF0138
orf02824	327	VFG022019(gb|NP_214796)	631	108/284(38.03)	1.01e-55	experimentally verified	VF0521	ESX-3	Mycobacterium tuberculosis H37Rv	eccA3	Type VII secretion system protein EccA3	http://www.mgc.ac.cn/cgi-bin/VFs/vfs.cgi?VFID=VF0521#VF0521
orf02839	270	VFG001206(gb|NP_273675)	352	78/195(40.00)	5.39e-39	experimentally verified	VF0272	FbpABC	Neisseria meningitidis MC58	fbpC	iron(III) ABC transporter, ATP-binding protein	http://www.mgc.ac.cn/cgi-bin/VFs/vfs.cgi?VFID=VF0272#VF0272
orf02848	475	VFG000919(gb|NP_756176)	445	61/199(30.65)	5.07e-19	experimentally verified	VF0227	Chu	Escherichia coli CFT073	chuW	Putative oxygen independent coproporphyrinogen III oxidase	http://www.mgc.ac.cn/cgi-bin/VFs/vfs.cgi?VFID=VF0227#VF0227
orf02852	488	VFG037705(gb|YP_001847163)	406	55/209(26.32)	3.11e-10	experimentally verified	VF0504	AdeFGH efflux pump	Acinetobacter baumannii ACICU	adeF	membrane-fusion protein	http://www.mgc.ac.cn/cgi-bin/VFs/vfs.cgi?VFID=VF0504#VF0504
orf02853	505	VFG036956(gb|NP_273368)	508	130/493(26.37)	1.1e-46	experimentally verified	VF0450	FarAB	Neisseria meningitidis MC58	farB	fatty acid efflux system protein FarB	http://www.mgc.ac.cn/cgi-bin/VFs/vfs.cgi?VFID=VF0450#VF0450
orf02854	217	VFG036938(gb|NP_273367)	384	49/161(30.43)	1.48e-18	experimentally verified	VF0450	FarAB	Neisseria meningitidis MC58	farA	fatty acid efflux system protein FarA	http://www.mgc.ac.cn/cgi-bin/VFs/vfs.cgi?VFID=VF0450#VF0450
orf02860	500	VFG036956(gb|NP_273368)	508	110/397(27.71)	3.4e-34	experimentally verified	VF0450	FarAB	Neisseria meningitidis MC58	farB	fatty acid efflux system protein FarB	http://www.mgc.ac.cn/cgi-bin/VFs/vfs.cgi?VFID=VF0450#VF0450
orf02866	358	VFG050113(gb|YP_002336033.1)	291	80/216(37.04)	3.18e-41	experimentally verified	VF0583	Cereulide	Bacillus cereus AH187	cesC	ABC transporter ATP-binding protein, CesC	http://www.mgc.ac.cn/cgi-bin/VFs/vfs.cgi?VFID=VF0583#VF0583
orf02873	612	VFG013248(gb|NP_438233)	587	185/592(31.25)	4.97e-90	experimentally verified	CVF494	LOS	Haemophilus influenzae Rd KW20	msbA	lipid transporter ATP-binding/permease	None
orf02874	591	VFG007023(gb|NP_231091)	720	172/548(31.39)	1.44e-84	experimentally verified	CVF263	RTX toxin	Vibrio cholerae O1 biovar El Tor str. N16961	rtxB	RTX toxin transporter RtxB	None
orf02897	305	VFG049114(gb|YP_002918199.1)	307	75/306(24.51)	3.96e-12	experimentally verified	VF0572	Allantion utilization	Klebsiella pneumoniae subsp. pneumoniae NTUH-K2044	allS	DNA-binding transcriptional activator AllS	http://www.mgc.ac.cn/cgi-bin/VFs/vfs.cgi?VFID=VF0572#VF0572
orf02913	221	VFG000121(gb|NP_249453)	193	54/176(30.68)	3.99e-20	experimentally verified	VF0091	Alginate	Pseudomonas aeruginosa PAO1	algU	alginate biosynthesis protein AlgZ/FimS	http://www.mgc.ac.cn/cgi-bin/VFs/vfs.cgi?VFID=VF0091#VF0091
orf02917	290	VFG049150(gb|YP_006635476.1)	289	107/285(37.54)	1.24e-66	experimentally verified	VF0573	Colibactin	Klebsiella pneumoniae subsp. pneumoniae 1084	clbD	colibactin biosynthesis dehydrogenase ClbD	http://www.mgc.ac.cn/cgi-bin/VFs/vfs.cgi?VFID=VF0573#VF0573
orf02918	500	VFG002380(gb|NP_218385)	573	53/198(26.77)	6.55e-08	experimentally verified	VF0315	ESX-1	Mycobacterium tuberculosis H37Rv	eccA1	ESX-1 type VII secretion system AAA+ ATPase EccA1	http://www.mgc.ac.cn/cgi-bin/VFs/vfs.cgi?VFID=VF0315#VF0315
orf02928	324	VFG047431(gb|YP_169515.1)	260	43/182(23.63)	2.57e-07	experimentally verified	VF0552	Biotin synthesis	Francisella tularensis subsp. tularensis SCHU S4	bplA	biotin--[acetyl-CoA-carboxylase] ligase	http://www.mgc.ac.cn/cgi-bin/VFs/vfs.cgi?VFID=VF0552#VF0552
orf02930	387	VFG013496(gb|NP_439840)	353	79/325(24.31)	6.25e-15	experimentally verified	CVF494	LOS	Haemophilus influenzae Rd KW20	lsgC	glycosyltransferase	None
orf02942	168	VFG045340(gb|NP_539653)	175	83/163(50.92)	1.92e-36	experimentally verified	VF0414	RicA	Brucella melitensis bv. 1 str. 16M	ricA	Rab2 interacting conserved protein A	http://www.mgc.ac.cn/cgi-bin/VFs/vfs.cgi?VFID=VF0414#VF0414
orf02946	198	VFG000121(gb|NP_249453)	193	68/190(35.79)	2.88e-30	experimentally verified	VF0091	Alginate	Pseudomonas aeruginosa PAO1	algU	alginate biosynthesis protein AlgZ/FimS	http://www.mgc.ac.cn/cgi-bin/VFs/vfs.cgi?VFID=VF0091#VF0091
orf02949	367	VFG001965(gb|NP_282578)	367	96/326(29.45)	3.41e-28	experimentally verified	VF0323	Capsule	Campylobacter jejuni subsp. jejuni NCTC 11168	Cj1437c	aminotransferase	http://www.mgc.ac.cn/cgi-bin/VFs/vfs.cgi?VFID=VF0323#VF0323
orf02955	516	VFG044323(gb|YP_002920243)	434	84/264(31.82)	8.6e-35	experimentally verified	VF0564	Ybt	Klebsiella pneumoniae subsp. pneumoniae NTUH-K2044	ybtS	yersiniabactin biosynthesis salicylate synthase YbtS	http://www.mgc.ac.cn/cgi-bin/VFs/vfs.cgi?VFID=VF0564#VF0564
orf02959	266	VFG007364(gb|NP_231832)	275	85/252(33.73)	1.63e-35	experimentally verified	VF0519	Flagella	Vibrio cholerae O1 biovar El Tor str. N16961	cheR	chemotaxis protein methyltransferase CheR	http://www.mgc.ac.cn/cgi-bin/VFs/vfs.cgi?VFID=VF0519#VF0519
orf02973	505	VFG005776(gb|NP_687685)	309	68/225(30.22)	7.03e-20	experimentally verified	CVF171	Beta-hemolysin/cytolysin	Streptococcus agalactiae 2603V/R	cylA	ABC (ATP-binding cassette) transporter CylA	None
orf02992	308	VFG033025(gb|NP_463944)	466	83/209(39.71)	1.92e-35	experimentally verified	VF0442	PgdA	Listeria monocytogenes EGD-e	pdgA	Peptidoglycan N-deacetylase	http://www.mgc.ac.cn/cgi-bin/VFs/vfs.cgi?VFID=VF0442#VF0442
orf02996	484	VFG009810(gb|NP_215272)	485	95/250(38.00)	6.39e-39	experimentally verified	CVF331	PhoP/R	Mycobacterium tuberculosis H37Rv	phoR	Possible two component system response sensor kinase membrane associated PhoR	None
orf02997	238	VFG038219(gb|YP_001845364)	238	86/230(37.39)	3.84e-50	experimentally verified	VF0463	BfmRS	Acinetobacter baumannii ACICU	bfmR	biofilm-controlling response regulator	http://www.mgc.ac.cn/cgi-bin/VFs/vfs.cgi?VFID=VF0463#VF0463
orf03013	144	VFG041304(gb|YP_095978)	188	69/136(50.74)	2.83e-40	experimentally verified	SS047	Dot/Icm	Legionella pneumophila subsp. pneumophila str. Philadelphia 1	lirB	Dot/Icm type IV secretion system effector LirB	None
orf03014	455	VFG044197(gb|YP_169103)	417	103/412(25.00)	4.11e-25	experimentally verified	VF0551	Rhizoferrin	Francisella tularensis subsp. tularensis SCHU S4	fslC	diaminopimelate decarboxylase	http://www.mgc.ac.cn/cgi-bin/VFs/vfs.cgi?VFID=VF0551#VF0551
orf03018	251	VFG002319(gb|YP_001006726)	240	56/202(27.72)	1.21e-12	experimentally verified	VF0394	Flagella	Yersinia enterocolitica subsp. enterocolitica 8081	fliA	flagellar biosynthesis sigma factor	http://www.mgc.ac.cn/cgi-bin/VFs/vfs.cgi?VFID=VF0394#VF0394
orf03025	312	VFG048229(gb|YP_002921134.1)	201	63/182(34.62)	2.48e-19	experimentally verified	VF0566	Type I fimbriae	Klebsiella pneumoniae subsp. pneumoniae NTUH-K2044	fimB	tyrosine recombinase	http://www.mgc.ac.cn/cgi-bin/VFs/vfs.cgi?VFID=VF0566#VF0566
orf03043	528	VFG001228(gb|NP_249102)	682	54/128(42.19)	4.78e-23	experimentally verified	VF0082	Type IV pili	Pseudomonas aeruginosa PAO1	pilJ	twitching motility protein PilJ	http://www.mgc.ac.cn/cgi-bin/VFs/vfs.cgi?VFID=VF0082#VF0082
orf03046	267	VFG002526(gb|YP_109897)	367	47/112(41.96)	1.1e-14	experimentally verified	VF0430	Flagella	Burkholderia pseudomallei K96243	cheB	chemotaxis-specific methylesterase	http://www.mgc.ac.cn/cgi-bin/VFs/vfs.cgi?VFID=VF0430#VF0430
orf03049	572	VFG037118(gb|NP_273782)	557	172/572(30.07)	6.16e-71	experimentally verified	VF0457	RecN	Neisseria meningitidis MC58	recN	DNA repair protein RecN	http://www.mgc.ac.cn/cgi-bin/VFs/vfs.cgi?VFID=VF0457#VF0457
orf03077	333	VFG037372(gb|YP_001847241)	322	67/206(32.52)	3.81e-16	experimentally verified	VF0467	Acinetobactin	Acinetobacter baumannii ACICU	bauB	ferric siderophore ABC transporter, periplasmic siderophore-binding protein	http://www.mgc.ac.cn/cgi-bin/VFs/vfs.cgi?VFID=VF0467#VF0467
orf03081	329	VFG010759(gb|YP_096418)	665	83/347(23.92)	4.27e-11	experimentally verified	SS047	Dot/Icm	Legionella pneumophila subsp. pneumophila str. Philadelphia 1	vpdA	Dot/Icm type IV secretion system effector VdpA	None
orf03083	141	VFG001406(gb|NP_217227)	230	32/110(29.09)	1.23e-08	experimentally verified	VF0300	IdeR	Mycobacterium tuberculosis H37Rv	ideR	Iron-dependent repressor and activator IdeR	http://www.mgc.ac.cn/cgi-bin/VFs/vfs.cgi?VFID=VF0300#VF0300
orf03092	870	VFG006717(gb|NP_465159)	866	552/866(63.74)	0	experimentally verified	VF0444	Lap	Listeria monocytogenes EGD-e	lap	Listeria adhesion protein Lap	http://www.mgc.ac.cn/cgi-bin/VFs/vfs.cgi?VFID=VF0444#VF0444
orf03099	360	VFG000038(gb|NP_878995)	350	57/196(29.08)	1.72e-21	experimentally verified	VF0033	LPS	Bordetella pertussis Tohama I	bplA	probable oxidoreductase	http://www.mgc.ac.cn/cgi-bin/VFs/vfs.cgi?VFID=VF0033#VF0033
orf03108	323	VFG037100(gb|NP_273110)	522	140/321(43.61)	1.33e-87	experimentally verified	VF0456	MsrAB	Neisseria meningitidis MC58	msrA/B(pilB)	trifunctional thioredoxin/methionine sulfoxide reductase A/B protein	http://www.mgc.ac.cn/cgi-bin/VFs/vfs.cgi?VFID=VF0456#VF0456
orf03109	267	VFG000030(gb|NP_878987)	234	56/206(27.18)	1.62e-06	experimentally verified	VF0033	LPS	Bordetella pertussis Tohama I	bplI	lipopolysaccharide biosynthesis protein	http://www.mgc.ac.cn/cgi-bin/VFs/vfs.cgi?VFID=VF0033#VF0033
orf03121	289	VFG005767(gb|NP_687682)	240	64/256(25.00)	2.21e-11	experimentally verified	CVF171	Beta-hemolysin/cytolysin	Streptococcus agalactiae 2603V/R	cylG	3-ketoacyl-ACP-reductase CylG	None
orf03124	279	VFG000421(gb|NP_395427.1)	307	34/95(35.79)	3.83e-09	experimentally verified	VF0138	F1 antigen	Yersinia pestis CO92	caf1R	F1 operon positive regulatory protein	http://www.mgc.ac.cn/cgi-bin/VFs/vfs.cgi?VFID=VF0138#VF0138
orf03132	222	VFG046610(gb|YP_169796.1)	222	98/217(45.16)	1.79e-59	experimentally verified	VF0543	Capsule	Francisella tularensis subsp. tularensis SCHU S4	rpe	ribulose-phosphate 3-epimerase	http://www.mgc.ac.cn/cgi-bin/VFs/vfs.cgi?VFID=VF0543#VF0543
orf03134	750	VFG002060(gb|NP_248764)	1032	99/277(35.74)	5.2e-45	experimentally verified	VF0334	HSI-I	Pseudomonas aeruginosa PAO1	ppkA	serine/threonine protein kinase PpkA	http://www.mgc.ac.cn/cgi-bin/VFs/vfs.cgi?VFID=VF0334#VF0334
orf03135	258	VFG002061(gb|NP_248765)	242	86/236(36.44)	1.08e-36	experimentally verified	VF0334	HSI-I	Pseudomonas aeruginosa PAO1	pppA	Pseudomonas protein phosphatase PppA	http://www.mgc.ac.cn/cgi-bin/VFs/vfs.cgi?VFID=VF0334#VF0334
orf03138	319	VFG002230(gb|NP_540335)	259	38/112(33.93)	1.63e-16	experimentally verified	VF0367	LPS	Brucella melitensis bv. 1 str. 16M	wbkC	GDP-mannose 4,6-dehydratase / GDP-4-amino-4,6-dideoxy-D-mannose formyltransferase	http://www.mgc.ac.cn/cgi-bin/VFs/vfs.cgi?VFID=VF0367#VF0367
orf03149	932	VFG000574(gb|NP_462662)	908	267/931(28.68)	1.52e-82	experimentally verified	VF0106	MgtBC	Salmonella enterica subsp. enterica serovar Typhimurium str. LT2	mgtB	Mg2+ transport protein	http://www.mgc.ac.cn/cgi-bin/VFs/vfs.cgi?VFID=VF0106#VF0106
orf03150	582	VFG002160(gb|NP_465354)	570	252/580(43.45)	1.35e-154	experimentally verified	VF0349	FbpA	Listeria monocytogenes EGD-e	fbpA	fibronectin-binding protein	http://www.mgc.ac.cn/cgi-bin/VFs/vfs.cgi?VFID=VF0349#VF0349
orf03152	324	VFG044083(gb|NP_250948)	312	65/298(21.81)	6.5e-12	experimentally verified	IA001	pyoverdine	Pseudomonas aeruginosa PAO1	ptxR	transcriptional regulator PtxR	None
orf03169	288	VFG000421(gb|NP_395427.1)	307	71/287(24.74)	6.61e-11	experimentally verified	VF0138	F1 antigen	Yersinia pestis CO92	caf1R	F1 operon positive regulatory protein	http://www.mgc.ac.cn/cgi-bin/VFs/vfs.cgi?VFID=VF0138#VF0138
orf03172	571	VFG050017(gb|NP_832067.1)	538	134/517(25.92)	6.34e-33	experimentally verified	VF0586	Bacillibactin	Bacillus cereus ATCC 14579	dhbE	2,3-dihydroxybenzoate adenylase DhbE	http://www.mgc.ac.cn/cgi-bin/VFs/vfs.cgi?VFID=VF0586#VF0586
orf03177	335	VFG002197(gb|NP_814691)	336	90/336(26.79)	5.83e-38	experimentally verified	VF0362	BopD	Enterococcus faecalis V583	bopD	sugar-binding transcriptional regulator, LacI family	http://www.mgc.ac.cn/cgi-bin/VFs/vfs.cgi?VFID=VF0362#VF0362
orf03186	468	VFG048830(gb|YP_002920353.1)	468	321/468(68.59)	1.03e-234	experimentally verified	VF0560	Capsule	Klebsiella pneumoniae subsp. pneumoniae NTUH-K2044	gnd	6-phosphogluconate dehydrogenase	http://www.mgc.ac.cn/cgi-bin/VFs/vfs.cgi?VFID=VF0560#VF0560
orf03213	409	VFG002097(gb|YP_094583)	427	51/204(25.00)	8.11e-06	experimentally verified	VF0337	Pht	Legionella pneumophila subsp. pneumophila str. Philadelphia 1	phtA	major facilitator family transporter, phagosomal transporter	http://www.mgc.ac.cn/cgi-bin/VFs/vfs.cgi?VFID=VF0337#VF0337
orf03218	587	VFG043209(gb|YP_001006778)	557	37/54(68.52)	1.08e-14	experimentally verified	AI145	peritrichous flagella	Yersinia enterocolitica subsp. enterocolitica 8081	cheD	methyl-accepting chemotaxis protein CheD	None
orf03225	541	VFG007484(gb|NP_231766)	479	39/115(33.91)	2.24e-13	experimentally verified	VF0519	Flagella	Vibrio cholerae O1 biovar El Tor str. N16961	fleR/flrC	sigma-54 dependent response regulator	http://www.mgc.ac.cn/cgi-bin/VFs/vfs.cgi?VFID=VF0519#VF0519
orf03226	593	VFG000120(gb|NP_253949)	358	56/186(30.11)	4.61e-17	experimentally verified	VF0091	Alginate	Pseudomonas aeruginosa PAO1	algZ	sigma factor AlgU	http://www.mgc.ac.cn/cgi-bin/VFs/vfs.cgi?VFID=VF0091#VF0091
orf03232	628	VFG049918(gb|NP_798146.1)	736	98/406(24.14)	2.69e-11	experimentally verified	VF0578	VpadF	Vibrio parahaemolyticus RIMD 2210633	vpadF	surface adhesin VpadF	http://www.mgc.ac.cn/cgi-bin/VFs/vfs.cgi?VFID=VF0578#VF0578
orf03237	784	VFG049153(gb|YP_006635479.1)	415	86/310(27.74)	1.06e-22	experimentally verified	VF0573	Colibactin	Klebsiella pneumoniae subsp. pneumoniae 1084	clbG	colibactin biosynthesis acyltransferase ClbG	http://www.mgc.ac.cn/cgi-bin/VFs/vfs.cgi?VFID=VF0573#VF0573
orf03238	317	VFG049148(gb|YP_006635474.1)	2970	84/287(29.27)	3.78e-31	experimentally verified	VF0573	Colibactin	Klebsiella pneumoniae subsp. pneumoniae 1084	clbB	colibactin hybrid non-ribosomal peptide synthetase/type I polyketide synthase ClbB	http://www.mgc.ac.cn/cgi-bin/VFs/vfs.cgi?VFID=VF0573#VF0573
orf03239	291	VFG005767(gb|NP_687682)	240	59/199(29.65)	2.14e-22	experimentally verified	CVF171	Beta-hemolysin/cytolysin	Streptococcus agalactiae 2603V/R	cylG	3-ketoacyl-ACP-reductase CylG	None
orf03240	2972	VFG002548(gb|YP_109384)	2546	194/443(43.79)	1.36e-92	experimentally verified	VF0436	Capsule I	Burkholderia pseudomallei K96243	wcbR	capsular polysaccharide biosynthesis fatty acid synthase	http://www.mgc.ac.cn/cgi-bin/VFs/vfs.cgi?VFID=VF0436#VF0436
orf03241	4468	VFG049155(gb|YP_006635481.1)	1010	207/510(40.59)	8.61e-102	experimentally verified	VF0573	Colibactin	Klebsiella pneumoniae subsp. pneumoniae 1084	clbI	colibactin polyketide synthase ClbI	http://www.mgc.ac.cn/cgi-bin/VFs/vfs.cgi?VFID=VF0573#VF0573
orf03242	6581	VFG049155(gb|YP_006635481.1)	1010	197/513(38.40)	4.09e-94	experimentally verified	VF0573	Colibactin	Klebsiella pneumoniae subsp. pneumoniae 1084	clbI	colibactin polyketide synthase ClbI	http://www.mgc.ac.cn/cgi-bin/VFs/vfs.cgi?VFID=VF0573#VF0573
orf03243	3709	VFG016058(gb|NP_251114)	4342	515/1744(29.53)	1.02e-214	experimentally verified	IA001	pyoverdine	Pseudomonas aeruginosa PAO1	pvdL	peptide synthase PvdL	None
orf03248	415	VFG005788(gb|NP_687689)	731	100/407(24.57)	9.24e-24	experimentally verified	CVF171	Beta-hemolysin/cytolysin	Streptococcus agalactiae 2603V/R	cylI	putative 3-ketoacyl-ACP synthase CylI	None
orf03268	177	VFG006553(gb|NP_207125)	180	33/111(29.73)	1.57e-07	experimentally verified	VF0608	Flagellar glycosylation/Pse biosynthetic pathway	Helicobacter pylori 26695	pseH/flmH/flaG1	UDP-4-amino-4,6-dideoxy-N-acetyl-beta-L-altrosamine N-acetyltransferase; Pseudaminic acid biosynthesis protein H	http://www.mgc.ac.cn/cgi-bin/VFs/vfs.cgi?VFID=VF0608#VF0608
orf03279	295	VFG044083(gb|NP_250948)	312	79/294(26.87)	5.42e-14	experimentally verified	IA001	pyoverdine	Pseudomonas aeruginosa PAO1	ptxR	transcriptional regulator PtxR	None
orf03295	1071	VFG047708(gb|YP_170571.1)	1094	508/1085(46.82)	0	experimentally verified	VF0558	Pyrimidine biosynthesis	Francisella tularensis subsp. tularensis SCHU S4	carB	carbamoyl phosphate synthase large subunit	http://www.mgc.ac.cn/cgi-bin/VFs/vfs.cgi?VFID=VF0558#VF0558
orf03296	378	VFG047726(gb|YP_170570.1)	388	156/382(40.84)	7.99e-88	experimentally verified	VF0558	Pyrimidine biosynthesis	Francisella tularensis subsp. tularensis SCHU S4	carA	carbamoyl phosphate synthase small subunit	http://www.mgc.ac.cn/cgi-bin/VFs/vfs.cgi?VFID=VF0558#VF0558
orf03297	440	VFG049120(gb|YP_002918207.1)	453	135/458(29.48)	2.08e-47	experimentally verified	VF0572	Allantion utilization	Klebsiella pneumoniae subsp. pneumoniae NTUH-K2044	allB	allantoinase	http://www.mgc.ac.cn/cgi-bin/VFs/vfs.cgi?VFID=VF0572#VF0572
orf03298	304	VFG047690(gb|YP_170572.1)	306	93/304(30.59)	1.32e-39	experimentally verified	VF0558	Pyrimidine biosynthesis	Francisella tularensis subsp. tularensis SCHU S4	pyrB	aspartate carbamoyltransferase	http://www.mgc.ac.cn/cgi-bin/VFs/vfs.cgi?VFID=VF0558#VF0558
orf03301	163	VFG002161(gb|NP_465369)	154	70/151(46.36)	7.96e-43	experimentally verified	VF0351	Lsp	Listeria monocytogenes EGD-e	lspA	signal peptidase II	http://www.mgc.ac.cn/cgi-bin/VFs/vfs.cgi?VFID=VF0351#VF0351
orf03312	260	VFG002319(gb|YP_001006726)	240	55/197(27.92)	8.12e-14	experimentally verified	VF0394	Flagella	Yersinia enterocolitica subsp. enterocolitica 8081	fliA	flagellar biosynthesis sigma factor	http://www.mgc.ac.cn/cgi-bin/VFs/vfs.cgi?VFID=VF0394#VF0394
orf03313	246	VFG007574(gb|NP_231698)	244	45/195(23.08)	3.99e-08	experimentally verified	VF0519	Flagella	Vibrio cholerae O1 biovar El Tor str. N16961	fliA	flagellar biosynthesis sigma factor FliA	http://www.mgc.ac.cn/cgi-bin/VFs/vfs.cgi?VFID=VF0519#VF0519
orf03321	301	VFG002184(gb|NP_816135)	817	100/279(35.84)	2.5e-45	experimentally verified	VF0361	Capsule	Enterococcus faecalis V583	cpsG	MurB family protein	http://www.mgc.ac.cn/cgi-bin/VFs/vfs.cgi?VFID=VF0361#VF0361
orf03325	322	VFG011519(gb|NP_540343)	335	41/157(26.11)	8.11e-08	experimentally verified	CVF383	LPS	Brucella melitensis bv. 1 str. 16M	wbpL	undecaprenyl-phosphate alpha-N-acetylglucosaminyltransferase	None
orf03336	312	VFG000344(gb|NP_438273)	351	83/257(32.30)	1.83e-34	experimentally verified	VF0268	HitABC	Haemophilus influenzae Rd KW20	hitC	iron(III) ABC transporter, ATP-binding protein	http://www.mgc.ac.cn/cgi-bin/VFs/vfs.cgi?VFID=VF0268#VF0268
orf03345	353	VFG050189(gb|AJI07938.1)	304	95/296(32.09)	6.56e-36	experimentally verified	CVF891	B. cereus exo-polysaccharide (BPS)	Bacillus cereus G9241	bpsX	LytR family transcriptional regulator	None
orf03347	613	VFG046465(gb|YP_169203.1)	394	87/299(29.10)	4.45e-21	experimentally verified	VF0460	EF-Tu	Francisella tularensis subsp. tularensis SCHU S4	tufA	elongation factor Tu	http://www.mgc.ac.cn/cgi-bin/VFs/vfs.cgi?VFID=VF0460#VF0460
orf03353	382	VFG015994(gb|NP_251084)	427	58/217(26.73)	1.54e-13	experimentally verified	IA001	pyoverdine	Pseudomonas aeruginosa PAO1	pvdN	pyoverdine biosynthesis protein PvdN	None
orf03359	626	VFG022146(gb|NP_214805)	461	102/337(30.27)	2.51e-19	experimentally verified	VF0521	ESX-3	Mycobacterium tuberculosis H37Rv	mycP3	Type VII secretion system membrane-anchored mycosin MycP3	http://www.mgc.ac.cn/cgi-bin/VFs/vfs.cgi?VFID=VF0521#VF0521
orf03363	371	VFG039691(gb|NP_821046)	105	35/105(33.33)	4.25e-18	experimentally verified	CVF803	T4SS effectors	Coxiella burnetii RSA 493	CBU_2076	Coxiella Dot/Icm type IVB secretion system translocated effector	None
orf03366	377	VFG007574(gb|NP_231698)	244	71/222(31.98)	3.55e-15	experimentally verified	VF0519	Flagella	Vibrio cholerae O1 biovar El Tor str. N16961	fliA	flagellar biosynthesis sigma factor FliA	http://www.mgc.ac.cn/cgi-bin/VFs/vfs.cgi?VFID=VF0519#VF0519
orf03375	319	VFG047401(gb|YP_169301.1)	747	44/162(27.16)	2.21e-08	experimentally verified	VF0550	FupA	Francisella tularensis subsp. tularensis SCHU S4	feoB	Fe(2+) transporter permease subunit FeoB	http://www.mgc.ac.cn/cgi-bin/VFs/vfs.cgi?VFID=VF0550#VF0550
orf03386	147	VFG045566(gb|YP_096368)	147	59/146(40.41)	1.54e-34	experimentally verified	VF0156	Dot/Icm	Legionella pneumophila subsp. pneumophila str. Philadelphia 1	lpg2359	Dot/Icm type IV secretion system effector	http://www.mgc.ac.cn/cgi-bin/VFs/vfs.cgi?VFID=VF0156#VF0156
orf03400	254	VFG045607(gb|YP_096929)	244	70/237(29.54)	7e-33	experimentally verified	VF0156	Dot/Icm	Legionella pneumophila subsp. pneumophila str. Philadelphia 1	lpg2936	Dot/Icm type IV secretion system effector	http://www.mgc.ac.cn/cgi-bin/VFs/vfs.cgi?VFID=VF0156#VF0156
orf03407	237	VFG000116(gb|NP_254170)	449	36/102(35.29)	1.1e-11	experimentally verified	VF0091	Alginate	Pseudomonas aeruginosa PAO1	algB	two-component response regulator AlgB	http://www.mgc.ac.cn/cgi-bin/VFs/vfs.cgi?VFID=VF0091#VF0091
orf03408	520	VFG007490(gb|NP_231767)	351	38/118(32.20)	3.57e-08	experimentally verified	VF0519	Flagella	Vibrio cholerae O1 biovar El Tor str. N16961	fleS/flrB	sensory box sensor histidine kinase	http://www.mgc.ac.cn/cgi-bin/VFs/vfs.cgi?VFID=VF0519#VF0519
orf03419	604	VFG046465(gb|YP_169203.1)	394	79/280(28.21)	4.79e-17	experimentally verified	VF0460	EF-Tu	Francisella tularensis subsp. tularensis SCHU S4	tufA	elongation factor Tu	http://www.mgc.ac.cn/cgi-bin/VFs/vfs.cgi?VFID=VF0460#VF0460
orf03426	182	VFG000121(gb|NP_249453)	193	53/181(29.28)	3.62e-22	experimentally verified	VF0091	Alginate	Pseudomonas aeruginosa PAO1	algU	alginate biosynthesis protein AlgZ/FimS	http://www.mgc.ac.cn/cgi-bin/VFs/vfs.cgi?VFID=VF0091#VF0091
orf03428	841	VFG001354(gb|NP_345414)	627	71/290(24.48)	8.93e-14	experimentally verified	VF0145	CBPs	Streptococcus pneumoniae TIGR4	pce	choline binding protein E	http://www.mgc.ac.cn/cgi-bin/VFs/vfs.cgi?VFID=VF0145#VF0145
orf03453	753	VFG000208(gb|NP_250404)	278	22/54(40.74)	4.07e-06	experimentally verified	VF0083	TTSS	Pseudomonas aeruginosa PAO1	exsA	type III secretion system regulatory protein ExsA	http://www.mgc.ac.cn/cgi-bin/VFs/vfs.cgi?VFID=VF0083#VF0083
orf03457	258	VFG002556(gb|YP_109392)	337	58/211(27.49)	5.01e-07	experimentally verified	VF0436	Capsule I	Burkholderia pseudomallei K96243	wcbK	GDP sugar epimerase/dehydratase	http://www.mgc.ac.cn/cgi-bin/VFs/vfs.cgi?VFID=VF0436#VF0436
orf03462	220	VFG001284(gb|NP_647402)	186	17/49(34.69)	3.44e-06	experimentally verified	VF0014	Intercellular adhesion proteins	Staphylococcus aureus subsp. aureus MW2	icaR	ica operon transcriptional regulator IcaR	http://www.mgc.ac.cn/cgi-bin/VFs/vfs.cgi?VFID=VF0014#VF0014
orf03471	440	VFG044196(gb|YP_169102)	396	47/205(22.93)	2.97e-07	experimentally verified	VF0551	Rhizoferrin	Francisella tularensis subsp. tularensis SCHU S4	fslD	MFS transporter, inner membrane protein responsible for uptake of the ferric-siderophore complex	http://www.mgc.ac.cn/cgi-bin/VFs/vfs.cgi?VFID=VF0551#VF0551
orf03472	462	VFG049158(gb|YP_006635484.1)	487	80/245(32.65)	1.09e-29	experimentally verified	VF0573	Colibactin	Klebsiella pneumoniae subsp. pneumoniae 1084	clbL	colibactin biosynthesis amidase ClbL	http://www.mgc.ac.cn/cgi-bin/VFs/vfs.cgi?VFID=VF0573#VF0573
orf03476	1529	VFG049919(gb|AAD32394.1)	652	40/163(24.54)	6.92e-07	experimentally verified	CVF880	BslA	Bacillus anthracis str. Sterne	pXO1-90	s-layer protein	None
orf03496	801	VFG002438(gb|YP_111526)	353	35/103(33.98)	2.68e-07	experimentally verified	VF0428	Bsa T3SS	Burkholderia pseudomallei K96243	bprC	AraC family transcriptional regulator, regulates basal T6SS1 expression	http://www.mgc.ac.cn/cgi-bin/VFs/vfs.cgi?VFID=VF0428#VF0428
orf03497	559	VFG000088(gb|NP_230473)	620	89/361(24.65)	5.77e-14	experimentally verified	VF0126	TCP	Vibrio cholerae O1 biovar El Tor str. N16961	tcpI	negative regulator of the major pilin TcpA	http://www.mgc.ac.cn/cgi-bin/VFs/vfs.cgi?VFID=VF0126#VF0126
orf03508	369	VFG000344(gb|NP_438273)	351	106/294(36.05)	4.99e-60	experimentally verified	VF0268	HitABC	Haemophilus influenzae Rd KW20	hitC	iron(III) ABC transporter, ATP-binding protein	http://www.mgc.ac.cn/cgi-bin/VFs/vfs.cgi?VFID=VF0268#VF0268
orf03510	237	VFG048896(gb|YP_002920359.1)	170	27/52(51.92)	6.97e-09	experimentally verified	VF0560	Capsule	Klebsiella pneumoniae subsp. pneumoniae NTUH-K2044	wcsT	galactoside O-acetyltransferase	http://www.mgc.ac.cn/cgi-bin/VFs/vfs.cgi?VFID=VF0560#VF0560
orf03523	296	VFG045464(gb|NP_754290)	307	30/92(32.61)	3.62e-12	experimentally verified	VF0413	TcpC	Escherichia coli CFT073	tcpC	Tir domain containing protein TcpC	http://www.mgc.ac.cn/cgi-bin/VFs/vfs.cgi?VFID=VF0413#VF0413
orf03531	249	VFG038839(gb|YP_858598)	249	56/209(26.79)	2.41e-12	experimentally verified	CVF786	Polar flagella	Aeromonas hydrophila subsp. hydrophila ATCC 7966	flmH	short chain dehydrogenase/reductase family oxidoreductase	None
orf03532	573	VFG037372(gb|YP_001847241)	322	60/220(27.27)	4.91e-12	experimentally verified	VF0467	Acinetobactin	Acinetobacter baumannii ACICU	bauB	ferric siderophore ABC transporter, periplasmic siderophore-binding protein	http://www.mgc.ac.cn/cgi-bin/VFs/vfs.cgi?VFID=VF0467#VF0467
orf03534	347	VFG037372(gb|YP_001847241)	322	80/304(26.32)	5.94e-16	experimentally verified	VF0467	Acinetobactin	Acinetobacter baumannii ACICU	bauB	ferric siderophore ABC transporter, periplasmic siderophore-binding protein	http://www.mgc.ac.cn/cgi-bin/VFs/vfs.cgi?VFID=VF0467#VF0467
orf03564	687	VFG000104(gb|NP_230488)	626	127/542(23.43)	9.73e-24	experimentally verified	VF0127	ACF	Vibrio cholerae O1 biovar El Tor str. N16961	acfB	accessory colonization factor AcfB, methyl-accepting chemoreceptor	http://www.mgc.ac.cn/cgi-bin/VFs/vfs.cgi?VFID=VF0127#VF0127
orf03577	581	VFG043367(gb|NP_206903)	565	43/116(37.07)	1e-13	experimentally verified	AI150	Pse5Ac7Ac	Helicobacter pylori 26695	tlpB	membrane-bound chemoreceptor sensing pH and autoinducer-2	None
orf03587	507	VFG001386(gb|NP_215271)	247	48/161(29.81)	5.09e-11	experimentally verified	VF0286	PhoP	Mycobacterium tuberculosis H37Rv	phoP	Possible two component system response transcriptional positive regulator PhoP	http://www.mgc.ac.cn/cgi-bin/VFs/vfs.cgi?VFID=VF0286#VF0286
orf03588	614	VFG000120(gb|NP_253949)	358	57/209(27.27)	2.83e-10	experimentally verified	VF0091	Alginate	Pseudomonas aeruginosa PAO1	algZ	sigma factor AlgU	http://www.mgc.ac.cn/cgi-bin/VFs/vfs.cgi?VFID=VF0091#VF0091
orf03598	397	VFG044196(gb|YP_169102)	396	36/129(27.91)	1.02e-06	experimentally verified	VF0551	Rhizoferrin	Francisella tularensis subsp. tularensis SCHU S4	fslD	MFS transporter, inner membrane protein responsible for uptake of the ferric-siderophore complex	http://www.mgc.ac.cn/cgi-bin/VFs/vfs.cgi?VFID=VF0551#VF0551
orf03604	566	VFG043367(gb|NP_206903)	565	114/356(32.02)	1.39e-21	experimentally verified	AI150	Pse5Ac7Ac	Helicobacter pylori 26695	tlpB	membrane-bound chemoreceptor sensing pH and autoinducer-2	None
orf03605	531	VFG016355(gb|NP_831113)	760	49/158(31.01)	2.38e-17	experimentally verified	VF0585	IlsA	Bacillus cereus ATCC 14579	ilsA	InternalinNEAT domain-containing leucine-rich repeat protein	http://www.mgc.ac.cn/cgi-bin/VFs/vfs.cgi?VFID=VF0585#VF0585
orf03606	320	VFG044327(gb|YP_002920247)	319	32/102(31.37)	2.48e-13	experimentally verified	VF0564	Ybt	Klebsiella pneumoniae subsp. pneumoniae NTUH-K2044	ybtA	yersiniabactin transcriptional regulator YbtA	http://www.mgc.ac.cn/cgi-bin/VFs/vfs.cgi?VFID=VF0564#VF0564
orf03608	327	VFG045467(gb|YP_107884)	580	46/163(28.22)	6.97e-12	experimentally verified	VF0432	CdpA	Burkholderia pseudomallei K96243	cdpA	cyclic di-GMP phosphodiesterase	http://www.mgc.ac.cn/cgi-bin/VFs/vfs.cgi?VFID=VF0432#VF0432
orf03611	278	VFG043366(gb|NP_206899)	675	44/120(36.67)	1.34e-11	experimentally verified	AI150	Pse5Ac7Ac	Helicobacter pylori 26695	tlpA	membrane-bound chemoreceptor sensing arginine and bicarbonate	None
orf03621	216	VFG002440(gb|YP_111528)	223	64/206(31.07)	5.57e-29	experimentally verified	VF0428	Bsa T3SS	Burkholderia pseudomallei K96243	bprB	two-component response regulator	http://www.mgc.ac.cn/cgi-bin/VFs/vfs.cgi?VFID=VF0428#VF0428
orf03629	223	VFG000249(gb|NP_273676)	505	28/101(27.72)	1.68e-07	experimentally verified	VF0272	FbpABC	Neisseria meningitidis MC58	fbpB	iron(III) ABC transporter, permease protein	http://www.mgc.ac.cn/cgi-bin/VFs/vfs.cgi?VFID=VF0272#VF0272
orf03642	361	VFG040865(gb|YP_028299)	90	30/87(34.48)	9.73e-11	experimentally verified	VF0581	T7SS	Bacillus anthracis str. Sterne	esxB	type VII secretion system protein EsxB	http://www.mgc.ac.cn/cgi-bin/VFs/vfs.cgi?VFID=VF0581#VF0581
orf03646	279	VFG045346(gb|NP_933683)	269	78/256(30.47)	8.68e-33	experimentally verified	VF0513	IlpA	Vibrio vulnificus YJ016	IlpA	immunogenic lipoprotein A	http://www.mgc.ac.cn/cgi-bin/VFs/vfs.cgi?VFID=VF0513#VF0513
orf03659	245	VFG038839(gb|YP_858598)	249	65/237(27.43)	7.14e-22	experimentally verified	CVF786	Polar flagella	Aeromonas hydrophila subsp. hydrophila ATCC 7966	flmH	short chain dehydrogenase/reductase family oxidoreductase	None
orf03660	310	VFG007177(gb|NP_798078)	286	49/189(25.93)	2.34e-10	experimentally verified	VF0408	T3SS1	Vibrio parahaemolyticus RIMD 2210633	exsA	transcriptional regulator ExsA	http://www.mgc.ac.cn/cgi-bin/VFs/vfs.cgi?VFID=VF0408#VF0408
orf03663	345	VFG002197(gb|NP_814691)	336	91/348(26.15)	6.47e-26	experimentally verified	VF0362	BopD	Enterococcus faecalis V583	bopD	sugar-binding transcriptional regulator, LacI family	http://www.mgc.ac.cn/cgi-bin/VFs/vfs.cgi?VFID=VF0362#VF0362
orf03664	350	VFG002548(gb|YP_109384)	2546	50/184(27.17)	5.93e-08	experimentally verified	VF0436	Capsule I	Burkholderia pseudomallei K96243	wcbR	capsular polysaccharide biosynthesis fatty acid synthase	http://www.mgc.ac.cn/cgi-bin/VFs/vfs.cgi?VFID=VF0436#VF0436
orf03665	664	VFG001234(gb|NP_249107)	264	36/108(33.33)	7.47e-08	experimentally verified	VF0082	Type IV pili	Pseudomonas aeruginosa PAO1	chpD	probable transcriptional regulator	http://www.mgc.ac.cn/cgi-bin/VFs/vfs.cgi?VFID=VF0082#VF0082
orf03677	290	VFG000421(gb|NP_395427.1)	307	40/108(37.04)	7.22e-10	experimentally verified	VF0138	F1 antigen	Yersinia pestis CO92	caf1R	F1 operon positive regulatory protein	http://www.mgc.ac.cn/cgi-bin/VFs/vfs.cgi?VFID=VF0138#VF0138
orf03689	174	VFG039371(gb|NP_819795)	156	54/148(36.49)	7.86e-24	experimentally verified	CVF803	T4SS effectors	Coxiella burnetii RSA 493	phnB	Coxiella Dot/Icm type IVB secretion system translocated effector	None
orf03698	266	VFG001214(gb|NP_253237)	445	43/123(34.96)	4.45e-14	experimentally verified	VF0082	Type IV pili	Pseudomonas aeruginosa PAO1	pilR	two-component response regulator PilR	http://www.mgc.ac.cn/cgi-bin/VFs/vfs.cgi?VFID=VF0082#VF0082
orf03699	586	VFG000120(gb|NP_253949)	358	53/135(39.26)	1.52e-21	experimentally verified	VF0091	Alginate	Pseudomonas aeruginosa PAO1	algZ	sigma factor AlgU	http://www.mgc.ac.cn/cgi-bin/VFs/vfs.cgi?VFID=VF0091#VF0091
orf03703	338	VFG002197(gb|NP_814691)	336	85/322(26.40)	3.46e-30	experimentally verified	VF0362	BopD	Enterococcus faecalis V583	bopD	sugar-binding transcriptional regulator, LacI family	http://www.mgc.ac.cn/cgi-bin/VFs/vfs.cgi?VFID=VF0362#VF0362
orf03707	220	VFG001284(gb|NP_647402)	186	34/161(21.12)	2.95e-07	experimentally verified	VF0014	Intercellular adhesion proteins	Staphylococcus aureus subsp. aureus MW2	icaR	ica operon transcriptional regulator IcaR	http://www.mgc.ac.cn/cgi-bin/VFs/vfs.cgi?VFID=VF0014#VF0014
orf03715	355	VFG000344(gb|NP_438273)	351	78/250(31.20)	2.83e-27	experimentally verified	VF0268	HitABC	Haemophilus influenzae Rd KW20	hitC	iron(III) ABC transporter, ATP-binding protein	http://www.mgc.ac.cn/cgi-bin/VFs/vfs.cgi?VFID=VF0268#VF0268
orf03716	459	VFG009810(gb|NP_215272)	485	88/293(30.03)	1.96e-23	experimentally verified	CVF331	PhoP/R	Mycobacterium tuberculosis H37Rv	phoR	Possible two component system response sensor kinase membrane associated PhoR	None
orf03717	236	VFG038219(gb|YP_001845364)	238	77/228(33.77)	2.73e-40	experimentally verified	VF0463	BfmRS	Acinetobacter baumannii ACICU	bfmR	biofilm-controlling response regulator	http://www.mgc.ac.cn/cgi-bin/VFs/vfs.cgi?VFID=VF0463#VF0463
orf03720	395	VFG039282(gb|NP_819314)	406	222/398(55.78)	2.9e-152	experimentally verified	CVF803	T4SS effectors	Coxiella burnetii RSA 493	CBU_0270	Coxiella Dot/Icm type IVB secretion system translocated effector, trans-2-enoyl-CoA reductase	None
orf03725	1837	VFG002276(gb|NP_561089)	1104	31/73(42.47)	3.99e-12	experimentally verified	VF0388	kappa-toxin	Clostridium perfringens str. 13	colA	collagenase	http://www.mgc.ac.cn/cgi-bin/VFs/vfs.cgi?VFID=VF0388#VF0388
orf03726	541	VFG001797(gb|NP_735749)	1150	47/132(35.61)	7.09e-08	experimentally verified	VF0278	C5a peptidase	Streptococcus agalactiae NEM316	scpB	streptococcal C5a peptidase	http://www.mgc.ac.cn/cgi-bin/VFs/vfs.cgi?VFID=VF0278#VF0278
orf03732	421	VFG044198(gb|YP_169104)	420	72/330(21.82)	1.01e-09	experimentally verified	VF0551	Rhizoferrin	Francisella tularensis subsp. tularensis SCHU S4	fslB	MFS transporter, inner membrane protein responsible for uptake of the ferric-siderophore complex	http://www.mgc.ac.cn/cgi-bin/VFs/vfs.cgi?VFID=VF0551#VF0551
orf03733	250	VFG001206(gb|NP_273675)	352	99/242(40.91)	1.84e-50	experimentally verified	VF0272	FbpABC	Neisseria meningitidis MC58	fbpC	iron(III) ABC transporter, ATP-binding protein	http://www.mgc.ac.cn/cgi-bin/VFs/vfs.cgi?VFID=VF0272#VF0272
orf03735	283	VFG001983(gb|NP_282073)	259	57/184(30.98)	3.38e-11	experimentally verified	VF0327	PEB1	Campylobacter jejuni subsp. jejuni NCTC 11168	pebA	bifunctional adhesin/ABC transporter aspartate/glutamate-binding protein	http://www.mgc.ac.cn/cgi-bin/VFs/vfs.cgi?VFID=VF0327#VF0327
orf03757	276	VFG002061(gb|NP_248765)	242	61/225(27.11)	4.27e-12	experimentally verified	VF0334	HSI-I	Pseudomonas aeruginosa PAO1	pppA	Pseudomonas protein phosphatase PppA	http://www.mgc.ac.cn/cgi-bin/VFs/vfs.cgi?VFID=VF0334#VF0334
orf03765	303	VFG002060(gb|NP_248764)	1032	55/184(29.89)	4.1e-16	experimentally verified	VF0334	HSI-I	Pseudomonas aeruginosa PAO1	ppkA	serine/threonine protein kinase PpkA	http://www.mgc.ac.cn/cgi-bin/VFs/vfs.cgi?VFID=VF0334#VF0334
orf03766	417	VFG047636(gb|YP_169196.1)	422	31/121(25.62)	4.74e-06	experimentally verified	VF0554	AnsP	Francisella tularensis subsp. tularensis SCHU S4	ansP	major facilitator transporter	http://www.mgc.ac.cn/cgi-bin/VFs/vfs.cgi?VFID=VF0554#VF0554
orf03767	254	VFG000119(gb|NP_253948)	248	68/258(26.36)	3.18e-14	experimentally verified	VF0091	Alginate	Pseudomonas aeruginosa PAO1	algR	alginate biosynthesis regulatory protein AlgR	http://www.mgc.ac.cn/cgi-bin/VFs/vfs.cgi?VFID=VF0091#VF0091
orf03768	553	VFG000120(gb|NP_253949)	358	69/229(30.13)	4.73e-20	experimentally verified	VF0091	Alginate	Pseudomonas aeruginosa PAO1	algZ	sigma factor AlgU	http://www.mgc.ac.cn/cgi-bin/VFs/vfs.cgi?VFID=VF0091#VF0091
orf03770	498	VFG043367(gb|NP_206903)	565	48/152(31.58)	4.74e-17	experimentally verified	AI150	Pse5Ac7Ac	Helicobacter pylori 26695	tlpB	membrane-bound chemoreceptor sensing pH and autoinducer-2	None
orf03774	551	VFG000365(gb|NP_405474)	600	149/479(31.11)	7.53e-62	experimentally verified	VF0136	Yersiniabactin	Yersinia pestis CO92	ybtP	yersiniabactin ABC transporter ATP-binding/permease protein YbtP	http://www.mgc.ac.cn/cgi-bin/VFs/vfs.cgi?VFID=VF0136#VF0136
orf03775	717	VFG000365(gb|NP_405474)	600	134/534(25.09)	6.81e-48	experimentally verified	VF0136	Yersiniabactin	Yersinia pestis CO92	ybtP	yersiniabactin ABC transporter ATP-binding/permease protein YbtP	http://www.mgc.ac.cn/cgi-bin/VFs/vfs.cgi?VFID=VF0136#VF0136
orf03781	366	VFG005785(gb|NP_687688)	317	66/280(23.57)	9.04e-12	experimentally verified	CVF171	Beta-hemolysin/cytolysin	Streptococcus agalactiae 2603V/R	cylF	putative aminomethyltransferase CylF	None
orf03790	387	VFG006717(gb|NP_465159)	866	97/400(24.25)	8.42e-18	experimentally verified	VF0444	Lap	Listeria monocytogenes EGD-e	lap	Listeria adhesion protein Lap	http://www.mgc.ac.cn/cgi-bin/VFs/vfs.cgi?VFID=VF0444#VF0444
orf03792	329	VFG013286(gb|NP_438515)	338	158/341(46.33)	5.18e-91	experimentally verified	CVF494	LOS	Haemophilus influenzae Rd KW20	galE	UDP-glucose 4-epimerase	None
orf03802	482	VFG033025(gb|NP_463944)	466	61/168(36.31)	1.35e-25	experimentally verified	VF0442	PgdA	Listeria monocytogenes EGD-e	pdgA	Peptidoglycan N-deacetylase	http://www.mgc.ac.cn/cgi-bin/VFs/vfs.cgi?VFID=VF0442#VF0442
orf03805	749	VFG000104(gb|NP_230488)	626	98/438(22.37)	1.61e-19	experimentally verified	VF0127	ACF	Vibrio cholerae O1 biovar El Tor str. N16961	acfB	accessory colonization factor AcfB, methyl-accepting chemoreceptor	http://www.mgc.ac.cn/cgi-bin/VFs/vfs.cgi?VFID=VF0127#VF0127
orf03815	657	VFG000104(gb|NP_230488)	626	159/662(24.02)	5.06e-39	experimentally verified	VF0127	ACF	Vibrio cholerae O1 biovar El Tor str. N16961	acfB	accessory colonization factor AcfB, methyl-accepting chemoreceptor	http://www.mgc.ac.cn/cgi-bin/VFs/vfs.cgi?VFID=VF0127#VF0127
orf03818	383	VFG015994(gb|NP_251084)	427	49/172(28.49)	4.5e-08	experimentally verified	IA001	pyoverdine	Pseudomonas aeruginosa PAO1	pvdN	pyoverdine biosynthesis protein PvdN	None
orf03824	401	VFG040865(gb|YP_028299)	90	32/88(36.36)	2.51e-09	experimentally verified	VF0581	T7SS	Bacillus anthracis str. Sterne	esxB	type VII secretion system protein EsxB	http://www.mgc.ac.cn/cgi-bin/VFs/vfs.cgi?VFID=VF0581#VF0581
orf03830	605	VFG013248(gb|NP_438233)	587	190/585(32.48)	4.41e-89	experimentally verified	CVF494	LOS	Haemophilus influenzae Rd KW20	msbA	lipid transporter ATP-binding/permease	None
orf03840	725	VFG001826(gb|NP_217099)	790	297/716(41.48)	1.67e-186	experimentally verified	VF0287	RelA	Mycobacterium tuberculosis H37Rv	relA	Probable GTP pyrophosphokinase RelA (ATP:GTP 3'-pyrophosphotransferase) (PPGPP synthetase I) ((P)PPGPP synthetase) (GTP diphosphokinase)	http://www.mgc.ac.cn/cgi-bin/VFs/vfs.cgi?VFID=VF0287#VF0287
orf03842	682	VFG000104(gb|NP_230488)	626	117/482(24.27)	1.04e-25	experimentally verified	VF0127	ACF	Vibrio cholerae O1 biovar El Tor str. N16961	acfB	accessory colonization factor AcfB, methyl-accepting chemoreceptor	http://www.mgc.ac.cn/cgi-bin/VFs/vfs.cgi?VFID=VF0127#VF0127
orf03857	335	VFG002380(gb|NP_218385)	573	73/269(27.14)	1.74e-09	experimentally verified	VF0315	ESX-1	Mycobacterium tuberculosis H37Rv	eccA1	ESX-1 type VII secretion system AAA+ ATPase EccA1	http://www.mgc.ac.cn/cgi-bin/VFs/vfs.cgi?VFID=VF0315#VF0315
orf03878	265	VFG001265(gb|NP_250145)	280	77/252(30.56)	3.62e-26	experimentally verified	VF0273	Flagella	Pseudomonas aeruginosa PAO1	fleN	flagellar synthesis regulator FleN	http://www.mgc.ac.cn/cgi-bin/VFs/vfs.cgi?VFID=VF0273#VF0273
orf03892	434	VFG016046(gb|NP_251103)	469	107/334(32.04)	8.93e-33	experimentally verified	IA001	pyoverdine	Pseudomonas aeruginosa PAO1	pvdH	diaminobutyrate-2-oxoglutarate aminotransferase PvdH	None
orf03903	607	VFG038397(gb|YP_856376)	512	55/177(31.07)	4.76e-08	experimentally verified	SS194	T6SS	Aeromonas hydrophila subsp. hydrophila ATCC 7966	vasH/clpV	sigma-54 dependent transcriptional regulator	None
orf03905	418	VFG000079(gb|NP_463763)	820	91/351(25.93)	3.19e-13	experimentally verified	VF0072	ClpC	Listeria monocytogenes EGD-e	clpC	endopeptidase Clp ATP-binding chain C	http://www.mgc.ac.cn/cgi-bin/VFs/vfs.cgi?VFID=VF0072#VF0072
orf03906	211	VFG000077(gb|NP_465991)	198	129/196(65.82)	7.59e-92	experimentally verified	VF0074	ClpP	Listeria monocytogenes EGD-e	clpP	ATP-dependent Clp protease proteolytic subunit	http://www.mgc.ac.cn/cgi-bin/VFs/vfs.cgi?VFID=VF0074#VF0074
orf03915	346	VFG002197(gb|NP_814691)	336	82/332(24.70)	1.92e-27	experimentally verified	VF0362	BopD	Enterococcus faecalis V583	bopD	sugar-binding transcriptional regulator, LacI family	http://www.mgc.ac.cn/cgi-bin/VFs/vfs.cgi?VFID=VF0362#VF0362
orf03924	557	VFG007023(gb|NP_231091)	720	82/289(28.37)	4.29e-21	experimentally verified	CVF263	RTX toxin	Vibrio cholerae O1 biovar El Tor str. N16961	rtxB	RTX toxin transporter RtxB	None
orf03933	323	VFG002197(gb|NP_814691)	336	74/281(26.33)	1.53e-16	experimentally verified	VF0362	BopD	Enterococcus faecalis V583	bopD	sugar-binding transcriptional regulator, LacI family	http://www.mgc.ac.cn/cgi-bin/VFs/vfs.cgi?VFID=VF0362#VF0362
orf03937	451	VFG000133(gb|NP_252241)	481	137/473(28.96)	3.94e-42	experimentally verified	VF0091	Alginate	Pseudomonas aeruginosa PAO1	algA	phosphomannose isomerase / guanosine 5'-diphospho-D-mannose pyrophosphorylase	http://www.mgc.ac.cn/cgi-bin/VFs/vfs.cgi?VFID=VF0091#VF0091
orf03938	231	VFG038219(gb|YP_001845364)	238	69/226(30.53)	2.27e-33	experimentally verified	VF0463	BfmRS	Acinetobacter baumannii ACICU	bfmR	biofilm-controlling response regulator	http://www.mgc.ac.cn/cgi-bin/VFs/vfs.cgi?VFID=VF0463#VF0463
orf03942	234	VFG001214(gb|NP_253237)	445	33/109(30.28)	1.04e-11	experimentally verified	VF0082	Type IV pili	Pseudomonas aeruginosa PAO1	pilR	two-component response regulator PilR	http://www.mgc.ac.cn/cgi-bin/VFs/vfs.cgi?VFID=VF0082#VF0082
orf03943	303	VFG001940(gb|NP_282287)	303	30/112(26.79)	4.62e-09	experimentally verified	VF0326	LOS	Campylobacter jejuni subsp. jejuni NCTC 11168	wlaN	beta-1,3 galactosyltransferase	http://www.mgc.ac.cn/cgi-bin/VFs/vfs.cgi?VFID=VF0326#VF0326
orf03944	408	VFG047176(gb|YP_170398.1)	363	56/182(30.77)	3.17e-15	experimentally verified	VF0542	LPS	Francisella tularensis subsp. tularensis SCHU S4	wbtD	galacturonosyl transferase	http://www.mgc.ac.cn/cgi-bin/VFs/vfs.cgi?VFID=VF0542#VF0542
orf03955	322	VFG002197(gb|NP_814691)	336	81/333(24.32)	3.83e-18	experimentally verified	VF0362	BopD	Enterococcus faecalis V583	bopD	sugar-binding transcriptional regulator, LacI family	http://www.mgc.ac.cn/cgi-bin/VFs/vfs.cgi?VFID=VF0362#VF0362
orf03961	614	VFG015551(gb|NP_248741)	610	233/616(37.82)	1.78e-145	experimentally verified	CVF536	Phenazines biosynthesis	Pseudomonas aeruginosa PAO1	phzH	phenazine-modifying enzyme	None
orf03962	210	VFG013265(gb|NP_438428)	195	89/199(44.72)	3.29e-42	experimentally verified	CVF494	LOS	Haemophilus influenzae Rd KW20	orfM	deoxyribonucleotide triphosphate pyrophosphatase	None
orf03967	261	VFG049995(gb|NP_832065.1)	261	60/228(26.32)	3.3e-21	experimentally verified	VF0586	Bacillibactin	Bacillus cereus ATCC 14579	dhbA	2,3-dihydroxybenzoate-2,3-dehydrogenase, DhbA	http://www.mgc.ac.cn/cgi-bin/VFs/vfs.cgi?VFID=VF0586#VF0586
orf03973	372	VFG013315(gb|NP_438813)	254	49/154(31.82)	4.63e-16	experimentally verified	CVF494	LOS	Haemophilus influenzae Rd KW20	lgtF	beta-1,4-glucosyltransferase	None
orf03975	449	VFG001311(gb|NP_644953)	420	139/418(33.25)	1.27e-68	experimentally verified	VF0003	Capsule	Staphylococcus aureus subsp. aureus MW2	cap8O	capsular polysaccharide synthesis enzyme Cap8O	http://www.mgc.ac.cn/cgi-bin/VFs/vfs.cgi?VFID=VF0003#VF0003
orf03976	326	VFG012002(gb|NP_282439)	334	128/288(44.44)	3.36e-73	experimentally verified	AI151	Pse5Ac7Ac, Pse5Ac7Am, Pse8OAc, Pse5Am7AcGlnAc	Campylobacter jejuni subsp. jejuni NCTC 11168	pseB	UDP-GlcNAc-specific C4,6 dehydratase/C5 epimerase	None
orf03981	659	VFG000104(gb|NP_230488)	626	145/606(23.93)	1.3e-26	experimentally verified	VF0127	ACF	Vibrio cholerae O1 biovar El Tor str. N16961	acfB	accessory colonization factor AcfB, methyl-accepting chemoreceptor	http://www.mgc.ac.cn/cgi-bin/VFs/vfs.cgi?VFID=VF0127#VF0127
orf03988	75	VFG004125(gb|NP_460113)	216	26/53(49.06)	1.56e-11	experimentally verified	AI094	curli fibers/thin aggregative fimbriae (AGF)	Salmonella enterica subsp. enterica serovar Typhimurium str. LT2	csgD	DNA-binding transcriptional regulator CsgD	None
orf03993	362	VFG000038(gb|NP_878995)	350	47/192(24.48)	7.58e-13	experimentally verified	VF0033	LPS	Bordetella pertussis Tohama I	bplA	probable oxidoreductase	http://www.mgc.ac.cn/cgi-bin/VFs/vfs.cgi?VFID=VF0033#VF0033
orf03998	330	VFG050113(gb|YP_002336033.1)	291	81/265(30.57)	1.66e-33	experimentally verified	VF0583	Cereulide	Bacillus cereus AH187	cesC	ABC transporter ATP-binding protein, CesC	http://www.mgc.ac.cn/cgi-bin/VFs/vfs.cgi?VFID=VF0583#VF0583
orf04018	370	VFG050113(gb|YP_002336033.1)	291	71/214(33.18)	2.25e-40	experimentally verified	VF0583	Cereulide	Bacillus cereus AH187	cesC	ABC transporter ATP-binding protein, CesC	http://www.mgc.ac.cn/cgi-bin/VFs/vfs.cgi?VFID=VF0583#VF0583
orf04020	363	VFG013315(gb|NP_438813)	254	31/83(37.35)	8.72e-13	experimentally verified	CVF494	LOS	Haemophilus influenzae Rd KW20	lgtF	beta-1,4-glucosyltransferase	None
orf04025	343	VFG002197(gb|NP_814691)	336	82/343(23.91)	2.1e-24	experimentally verified	VF0362	BopD	Enterococcus faecalis V583	bopD	sugar-binding transcriptional regulator, LacI family	http://www.mgc.ac.cn/cgi-bin/VFs/vfs.cgi?VFID=VF0362#VF0362
orf04033	309	VFG047149(gb|YP_170396.1)	323	107/300(35.67)	1.1e-49	experimentally verified	VF0542	LPS	Francisella tularensis subsp. tularensis SCHU S4	wbtF	NAD dependent epimerase	http://www.mgc.ac.cn/cgi-bin/VFs/vfs.cgi?VFID=VF0542#VF0542
orf04039	406	VFG000031(gb|NP_878988)	390	60/204(29.41)	5.04e-13	experimentally verified	VF0033	LPS	Bordetella pertussis Tohama I	bplH	putative glycosyl transferase	http://www.mgc.ac.cn/cgi-bin/VFs/vfs.cgi?VFID=VF0033#VF0033
orf04043	399	VFG002368(gb|YP_001007260)	288	56/230(24.35)	5.5e-09	experimentally verified	VF0392	O-antigen	Yersinia enterocolitica subsp. enterocolitica 8081	wbcG	putative glycosyltransferase	http://www.mgc.ac.cn/cgi-bin/VFs/vfs.cgi?VFID=VF0392#VF0392
orf04044	238	VFG013354(gb|NP_439028)	250	51/162(31.48)	3.19e-19	experimentally verified	CVF494	LOS	Haemophilus influenzae Rd KW20	kfiC	lipopolysaccharide biosynthesis protein	None
orf04045	332	VFG002556(gb|YP_109392)	337	83/334(24.85)	2.01e-19	experimentally verified	VF0436	Capsule I	Burkholderia pseudomallei K96243	wcbK	GDP sugar epimerase/dehydratase	http://www.mgc.ac.cn/cgi-bin/VFs/vfs.cgi?VFID=VF0436#VF0436
orf04047	328	VFG043383(gb|NP_207633)	333	127/296(42.91)	6.14e-77	experimentally verified	VF0608	Flagellar glycosylation/Pse biosynthetic pathway	Helicobacter pylori 26695	pseB	UDP-N-acetylglucosamine 4,6-dehydratase	http://www.mgc.ac.cn/cgi-bin/VFs/vfs.cgi?VFID=VF0608#VF0608
orf04048	363	VFG001303(gb|NP_644945)	374	153/359(42.62)	1.02e-100	experimentally verified	VF0003	Capsule	Staphylococcus aureus subsp. aureus MW2	cap8G	capsular polysaccharide synthesis enzyme Cap8G	http://www.mgc.ac.cn/cgi-bin/VFs/vfs.cgi?VFID=VF0003#VF0003
orf04058	243	VFG047039(gb|YP_170388.1)	294	102/241(42.32)	5.44e-59	experimentally verified	VF0542	LPS	Francisella tularensis subsp. tularensis SCHU S4	wbtL	glucose-1-phosphate thymidylyltransferase	http://www.mgc.ac.cn/cgi-bin/VFs/vfs.cgi?VFID=VF0542#VF0542
orf04059	263	VFG001342(gb|NP_688174)	327	34/92(36.96)	5.92e-10	experimentally verified	VF0274	Capsule	Streptococcus agalactiae 2603V/R	cpsO	glycosyl transferase CpsO(V)	http://www.mgc.ac.cn/cgi-bin/VFs/vfs.cgi?VFID=VF0274#VF0274
orf04061	282	VFG037678(gb|YP_001847021)	415	58/193(30.05)	6.88e-09	experimentally verified	VF0472	PNAG	Acinetobacter baumannii ACICU	pgaC	poly-beta-1,6 N-acetyl-D-glucosamine synthase	http://www.mgc.ac.cn/cgi-bin/VFs/vfs.cgi?VFID=VF0472#VF0472
orf04063	592	VFG001314(gb|NP_647375)	509	195/517(37.72)	4.7e-88	experimentally verified	VF0024	Aureolysin	Staphylococcus aureus subsp. aureus MW2	aur	zinc metalloproteinase aureolysin	http://www.mgc.ac.cn/cgi-bin/VFs/vfs.cgi?VFID=VF0024#VF0024
orf04064	596	VFG002440(gb|YP_111528)	223	63/204(30.88)	1.56e-20	experimentally verified	VF0428	Bsa T3SS	Burkholderia pseudomallei K96243	bprB	two-component response regulator	http://www.mgc.ac.cn/cgi-bin/VFs/vfs.cgi?VFID=VF0428#VF0428
orf04066	669	VFG049162(gb|YP_006635488.1)	501	81/312(25.96)	7.92e-18	experimentally verified	VF0573	Colibactin	Klebsiella pneumoniae subsp. pneumoniae 1084	clbP	precolibactin peptidase ClbP	http://www.mgc.ac.cn/cgi-bin/VFs/vfs.cgi?VFID=VF0573#VF0573
orf04068	387	VFG000031(gb|NP_878988)	390	81/320(25.31)	3.18e-15	experimentally verified	VF0033	LPS	Bordetella pertussis Tohama I	bplH	putative glycosyl transferase	http://www.mgc.ac.cn/cgi-bin/VFs/vfs.cgi?VFID=VF0033#VF0033
orf04071	261	VFG001234(gb|NP_249107)	264	54/227(23.79)	5.52e-07	experimentally verified	VF0082	Type IV pili	Pseudomonas aeruginosa PAO1	chpD	probable transcriptional regulator	http://www.mgc.ac.cn/cgi-bin/VFs/vfs.cgi?VFID=VF0082#VF0082
orf04073	425	VFG014369(gb|NP_249789)	402	61/237(25.74)	3.94e-18	experimentally verified	AI138	Deoxyhexose linking sugar, 209 Da capping structure	Pseudomonas aeruginosa PAO1	fleS	two-component sensor	None
orf04077	248	VFG050113(gb|YP_002336033.1)	291	72/220(32.73)	1.98e-35	experimentally verified	VF0583	Cereulide	Bacillus cereus AH187	cesC	ABC transporter ATP-binding protein, CesC	http://www.mgc.ac.cn/cgi-bin/VFs/vfs.cgi?VFID=VF0583#VF0583
orf04079	259	VFG038839(gb|YP_858598)	249	64/220(29.09)	4.98e-23	experimentally verified	CVF786	Polar flagella	Aeromonas hydrophila subsp. hydrophila ATCC 7966	flmH	short chain dehydrogenase/reductase family oxidoreductase	None
orf04081	300	VFG044083(gb|NP_250948)	312	49/188(26.06)	8.41e-09	experimentally verified	IA001	pyoverdine	Pseudomonas aeruginosa PAO1	ptxR	transcriptional regulator PtxR	None
orf04083	246	VFG001826(gb|NP_217099)	790	36/116(31.03)	4.67e-06	experimentally verified	VF0287	RelA	Mycobacterium tuberculosis H37Rv	relA	Probable GTP pyrophosphokinase RelA (ATP:GTP 3'-pyrophosphotransferase) (PPGPP synthetase I) ((P)PPGPP synthetase) (GTP diphosphokinase)	http://www.mgc.ac.cn/cgi-bin/VFs/vfs.cgi?VFID=VF0287#VF0287
orf04107	168	VFG042390(gb|YP_540132)	183	41/137(29.93)	1.17e-10	experimentally verified	VF0222	S fimbriae	Escherichia coli UTI89	sfaX	regulatory protein SfaX	http://www.mgc.ac.cn/cgi-bin/VFs/vfs.cgi?VFID=VF0222#VF0222
orf04131	254	VFG005767(gb|NP_687682)	240	72/247(29.15)	2.47e-26	experimentally verified	CVF171	Beta-hemolysin/cytolysin	Streptococcus agalactiae 2603V/R	cylG	3-ketoacyl-ACP-reductase CylG	None
orf04132	280	VFG045346(gb|NP_933683)	269	112/276(40.58)	4e-63	experimentally verified	VF0513	IlpA	Vibrio vulnificus YJ016	IlpA	immunogenic lipoprotein A	http://www.mgc.ac.cn/cgi-bin/VFs/vfs.cgi?VFID=VF0513#VF0513
orf04134	340	VFG000344(gb|NP_438273)	351	77/241(31.95)	2.47e-36	experimentally verified	VF0268	HitABC	Haemophilus influenzae Rd KW20	hitC	iron(III) ABC transporter, ATP-binding protein	http://www.mgc.ac.cn/cgi-bin/VFs/vfs.cgi?VFID=VF0268#VF0268
orf04176	618	VFG000120(gb|NP_253949)	358	39/196(19.90)	1.62e-10	experimentally verified	VF0091	Alginate	Pseudomonas aeruginosa PAO1	algZ	sigma factor AlgU	http://www.mgc.ac.cn/cgi-bin/VFs/vfs.cgi?VFID=VF0091#VF0091
orf04177	531	VFG001226(gb|NP_249100)	121	36/114(31.58)	2.68e-11	experimentally verified	VF0082	Type IV pili	Pseudomonas aeruginosa PAO1	pilH	twitching motility protein PilH	http://www.mgc.ac.cn/cgi-bin/VFs/vfs.cgi?VFID=VF0082#VF0082
orf04196	158	VFG000121(gb|NP_249453)	193	42/158(26.58)	1.97e-09	experimentally verified	VF0091	Alginate	Pseudomonas aeruginosa PAO1	algU	alginate biosynthesis protein AlgZ/FimS	http://www.mgc.ac.cn/cgi-bin/VFs/vfs.cgi?VFID=VF0091#VF0091
orf04197	313	VFG033025(gb|NP_463944)	466	72/225(32.00)	1.08e-23	experimentally verified	VF0442	PgdA	Listeria monocytogenes EGD-e	pdgA	Peptidoglycan N-deacetylase	http://www.mgc.ac.cn/cgi-bin/VFs/vfs.cgi?VFID=VF0442#VF0442
orf04199	245	VFG001206(gb|NP_273675)	352	76/221(34.39)	1.75e-33	experimentally verified	VF0272	FbpABC	Neisseria meningitidis MC58	fbpC	iron(III) ABC transporter, ATP-binding protein	http://www.mgc.ac.cn/cgi-bin/VFs/vfs.cgi?VFID=VF0272#VF0272
orf04204	254	VFG005776(gb|NP_687685)	309	70/203(34.48)	9.97e-34	experimentally verified	CVF171	Beta-hemolysin/cytolysin	Streptococcus agalactiae 2603V/R	cylA	ABC (ATP-binding cassette) transporter CylA	None
orf04205	328	VFG038234(gb|YP_001845365)	549	52/205(25.37)	1.62e-11	experimentally verified	VF0463	BfmRS	Acinetobacter baumannii ACICU	bfmS	signal transduction histidine kinase	http://www.mgc.ac.cn/cgi-bin/VFs/vfs.cgi?VFID=VF0463#VF0463
orf04206	233	VFG038219(gb|YP_001845364)	238	81/225(36.00)	3.11e-34	experimentally verified	VF0463	BfmRS	Acinetobacter baumannii ACICU	bfmR	biofilm-controlling response regulator	http://www.mgc.ac.cn/cgi-bin/VFs/vfs.cgi?VFID=VF0463#VF0463
orf04211	526	VFG046465(gb|YP_169203.1)	394	51/186(27.42)	1.34e-08	experimentally verified	VF0460	EF-Tu	Francisella tularensis subsp. tularensis SCHU S4	tufA	elongation factor Tu	http://www.mgc.ac.cn/cgi-bin/VFs/vfs.cgi?VFID=VF0460#VF0460
orf04215	216	VFG002440(gb|YP_111528)	223	73/213(34.27)	3.72e-25	experimentally verified	VF0428	Bsa T3SS	Burkholderia pseudomallei K96243	bprB	two-component response regulator	http://www.mgc.ac.cn/cgi-bin/VFs/vfs.cgi?VFID=VF0428#VF0428
orf04222	408	VFG045330(gb|YP_095353)	386	45/155(29.03)	6.54e-10	experimentally verified	VF0291	Legiobactin	Legionella pneumophila subsp. pneumophila str. Philadelphia 1	lbtC	LbtC inner membrane protein required for import of Legiobactin	http://www.mgc.ac.cn/cgi-bin/VFs/vfs.cgi?VFID=VF0291#VF0291
orf04228	258	VFG007023(gb|NP_231091)	720	62/211(29.38)	1.09e-14	experimentally verified	CVF263	RTX toxin	Vibrio cholerae O1 biovar El Tor str. N16961	rtxB	RTX toxin transporter RtxB	None
orf04241	237	VFG000575(gb|NP_462663)	231	50/121(41.32)	8.1e-23	experimentally verified	VF0106	MgtBC	Salmonella enterica subsp. enterica serovar Typhimurium str. LT2	mgtC	Mg2+ transport protein	http://www.mgc.ac.cn/cgi-bin/VFs/vfs.cgi?VFID=VF0106#VF0106
orf04244	485	VFG049158(gb|YP_006635484.1)	487	118/483(24.43)	1.35e-27	experimentally verified	VF0573	Colibactin	Klebsiella pneumoniae subsp. pneumoniae 1084	clbL	colibactin biosynthesis amidase ClbL	http://www.mgc.ac.cn/cgi-bin/VFs/vfs.cgi?VFID=VF0573#VF0573
orf04255	264	VFG050118(gb|YP_002336038.1)	260	33/109(30.28)	3.86e-08	experimentally verified	VF0583	Cereulide	Bacillus cereus AH187	cesH	hydrolase, alpha/beta superfamily, CesH	http://www.mgc.ac.cn/cgi-bin/VFs/vfs.cgi?VFID=VF0583#VF0583
orf04264	257	VFG038888(gb|YP_001140312)	235	63/223(28.25)	1.9e-19	experimentally verified	VF0474	Lateral flagella	Aeromonas salmonicida subsp. salmonicida A449	lafS	LafS, RNA polymerase sigma factor	http://www.mgc.ac.cn/cgi-bin/VFs/vfs.cgi?VFID=VF0474#VF0474
orf04267	556	VFG038234(gb|YP_001845365)	549	69/227(30.40)	2.25e-22	experimentally verified	VF0463	BfmRS	Acinetobacter baumannii ACICU	bfmS	signal transduction histidine kinase	http://www.mgc.ac.cn/cgi-bin/VFs/vfs.cgi?VFID=VF0463#VF0463
orf04268	289	VFG038811(gb|YP_857347)	274	70/216(32.41)	5.22e-17	experimentally verified	AI144	ND	Aeromonas hydrophila subsp. hydrophila ATCC 7966	cheR-3	chemotaxis protein CheR	None
orf04269	1238	VFG009810(gb|NP_215272)	485	70/246(28.46)	6.63e-20	experimentally verified	CVF331	PhoP/R	Mycobacterium tuberculosis H37Rv	phoR	Possible two component system response sensor kinase membrane associated PhoR	None
orf04270	393	VFG043386(gb|NP_207858)	124	40/130(30.77)	5.4e-14	experimentally verified	AI150	Pse5Ac7Ac	Helicobacter pylori 26695	cheY	chemotaxis response regulator CheY	None
orf04280	542	VFG037386(gb|YP_001847242)	256	74/244(30.33)	2e-17	experimentally verified	VF0467	Acinetobactin	Acinetobacter baumannii ACICU	bauE	ferric siderophore ABC transporter, ATP-binding protein BauE	http://www.mgc.ac.cn/cgi-bin/VFs/vfs.cgi?VFID=VF0467#VF0467
orf04281	277	VFG048488(gb|YP_002918371.1)	264	120/253(47.43)	1.03e-77	experimentally verified	VF0562	Ent	Klebsiella pneumoniae subsp. pneumoniae NTUH-K2044	fepC	iron-enterobactin transporter ATP-binding protein	http://www.mgc.ac.cn/cgi-bin/VFs/vfs.cgi?VFID=VF0562#VF0562
orf04282	327	VFG001322(gb|NP_645833)	321	126/323(39.01)	2.99e-71	experimentally verified	VF0015	Isd	Staphylococcus aureus subsp. aureus MW2	isdF	iron-regulated surface determinant protein F, ATP-binding-cassette-type transmembrane transporter	http://www.mgc.ac.cn/cgi-bin/VFs/vfs.cgi?VFID=VF0015#VF0015
orf04283	319	VFG001321(gb|YP_001332078)	292	144/254(56.69)	1.13e-94	experimentally verified	VF0015	Isd	Staphylococcus aureus subsp. aureus str. Newman	isdE	iron-regulated surface determinant protein E	http://www.mgc.ac.cn/cgi-bin/VFs/vfs.cgi?VFID=VF0015#VF0015
orf04284	1455	VFG016355(gb|NP_831113)	760	41/133(30.83)	1.61e-15	experimentally verified	VF0585	IlsA	Bacillus cereus ATCC 14579	ilsA	InternalinNEAT domain-containing leucine-rich repeat protein	http://www.mgc.ac.cn/cgi-bin/VFs/vfs.cgi?VFID=VF0585#VF0585
orf04286	155	VFG016355(gb|NP_831113)	760	46/122(37.70)	7.66e-19	experimentally verified	VF0585	IlsA	Bacillus cereus ATCC 14579	ilsA	InternalinNEAT domain-containing leucine-rich repeat protein	http://www.mgc.ac.cn/cgi-bin/VFs/vfs.cgi?VFID=VF0585#VF0585
orf04287	171	VFG001319(gb|YP_001332076)	227	38/115(33.04)	3.29e-17	experimentally verified	VF0015	Isd	Staphylococcus aureus subsp. aureus str. Newman	isdC	iron-regulated surface determinant protein C	http://www.mgc.ac.cn/cgi-bin/VFs/vfs.cgi?VFID=VF0015#VF0015
orf04288	325	VFG001321(gb|YP_001332078)	292	72/243(29.63)	4.34e-28	experimentally verified	VF0015	Isd	Staphylococcus aureus subsp. aureus str. Newman	isdE	iron-regulated surface determinant protein E	http://www.mgc.ac.cn/cgi-bin/VFs/vfs.cgi?VFID=VF0015#VF0015
orf04289	332	VFG000922(gb|NP_756179)	330	119/320(37.19)	3.38e-61	experimentally verified	VF0227	Chu	Escherichia coli CFT073	chuU	heme permease protein ChuU	http://www.mgc.ac.cn/cgi-bin/VFs/vfs.cgi?VFID=VF0227#VF0227
orf04290	263	VFG048488(gb|YP_002918371.1)	264	110/257(42.80)	3.03e-65	experimentally verified	VF0562	Ent	Klebsiella pneumoniae subsp. pneumoniae NTUH-K2044	fepC	iron-enterobactin transporter ATP-binding protein	http://www.mgc.ac.cn/cgi-bin/VFs/vfs.cgi?VFID=VF0562#VF0562
orf04296	184	VFG042390(gb|YP_540132)	183	36/125(28.80)	1.11e-09	experimentally verified	VF0222	S fimbriae	Escherichia coli UTI89	sfaX	regulatory protein SfaX	http://www.mgc.ac.cn/cgi-bin/VFs/vfs.cgi?VFID=VF0222#VF0222
orf04297	410	VFG044196(gb|YP_169102)	396	63/278(22.66)	3.84e-10	experimentally verified	VF0551	Rhizoferrin	Francisella tularensis subsp. tularensis SCHU S4	fslD	MFS transporter, inner membrane protein responsible for uptake of the ferric-siderophore complex	http://www.mgc.ac.cn/cgi-bin/VFs/vfs.cgi?VFID=VF0551#VF0551
orf04303	669	VFG047401(gb|YP_169301.1)	747	244/711(34.32)	1.38e-125	experimentally verified	VF0550	FupA	Francisella tularensis subsp. tularensis SCHU S4	feoB	Fe(2+) transporter permease subunit FeoB	http://www.mgc.ac.cn/cgi-bin/VFs/vfs.cgi?VFID=VF0550#VF0550
orf04314	211	VFG036938(gb|NP_273367)	384	37/109(33.94)	6.54e-14	experimentally verified	VF0450	FarAB	Neisseria meningitidis MC58	farA	fatty acid efflux system protein FarA	http://www.mgc.ac.cn/cgi-bin/VFs/vfs.cgi?VFID=VF0450#VF0450
orf04315	507	VFG036956(gb|NP_273368)	508	111/434(25.58)	8.32e-38	experimentally verified	VF0450	FarAB	Neisseria meningitidis MC58	farB	fatty acid efflux system protein FarB	http://www.mgc.ac.cn/cgi-bin/VFs/vfs.cgi?VFID=VF0450#VF0450
orf04316	681	VFG000574(gb|NP_462662)	908	129/613(21.04)	1.33e-10	experimentally verified	VF0106	MgtBC	Salmonella enterica subsp. enterica serovar Typhimurium str. LT2	mgtB	Mg2+ transport protein	http://www.mgc.ac.cn/cgi-bin/VFs/vfs.cgi?VFID=VF0106#VF0106
orf04318	809	VFG000574(gb|NP_462662)	908	45/147(30.61)	4.55e-09	experimentally verified	VF0106	MgtBC	Salmonella enterica subsp. enterica serovar Typhimurium str. LT2	mgtB	Mg2+ transport protein	http://www.mgc.ac.cn/cgi-bin/VFs/vfs.cgi?VFID=VF0106#VF0106
orf04332	600	VFG000366(gb|NP_405475)	600	88/236(37.29)	5.53e-43	experimentally verified	VF0136	Yersiniabactin	Yersinia pestis CO92	ybtQ	yersiniabactin ABC transporter ATP-binding/permease protein YbtQ	http://www.mgc.ac.cn/cgi-bin/VFs/vfs.cgi?VFID=VF0136#VF0136
orf04333	586	VFG000366(gb|NP_405475)	600	135/480(28.12)	8.76e-41	experimentally verified	VF0136	Yersiniabactin	Yersinia pestis CO92	ybtQ	yersiniabactin ABC transporter ATP-binding/permease protein YbtQ	http://www.mgc.ac.cn/cgi-bin/VFs/vfs.cgi?VFID=VF0136#VF0136
orf04336	549	VFG000119(gb|NP_253948)	248	42/119(35.29)	4.94e-16	experimentally verified	VF0091	Alginate	Pseudomonas aeruginosa PAO1	algR	alginate biosynthesis regulatory protein AlgR	http://www.mgc.ac.cn/cgi-bin/VFs/vfs.cgi?VFID=VF0091#VF0091
orf04337	596	VFG000120(gb|NP_253949)	358	59/195(30.26)	6.41e-16	experimentally verified	VF0091	Alginate	Pseudomonas aeruginosa PAO1	algZ	sigma factor AlgU	http://www.mgc.ac.cn/cgi-bin/VFs/vfs.cgi?VFID=VF0091#VF0091
orf04344	454	VFG038900(gb|YP_857314)	439	93/397(23.43)	1.54e-27	experimentally verified	CVF792	Hemolysin HlyA	Aeromonas hydrophila subsp. hydrophila ATCC 7966	hlyA	Hemolysin A	None
orf04349	326	VFG037372(gb|YP_001847241)	322	96/282(34.04)	2.89e-55	experimentally verified	VF0467	Acinetobactin	Acinetobacter baumannii ACICU	bauB	ferric siderophore ABC transporter, periplasmic siderophore-binding protein	http://www.mgc.ac.cn/cgi-bin/VFs/vfs.cgi?VFID=VF0467#VF0467
orf04350	252	VFG037386(gb|YP_001847242)	256	128/252(50.79)	6.14e-91	experimentally verified	VF0467	Acinetobactin	Acinetobacter baumannii ACICU	bauE	ferric siderophore ABC transporter, ATP-binding protein BauE	http://www.mgc.ac.cn/cgi-bin/VFs/vfs.cgi?VFID=VF0467#VF0467
orf04351	316	VFG037400(gb|YP_001847243)	315	99/308(32.14)	7.59e-61	experimentally verified	VF0467	Acinetobactin	Acinetobacter baumannii ACICU	bauC	ferric siderophore ABC transporter, permease protein BauC	http://www.mgc.ac.cn/cgi-bin/VFs/vfs.cgi?VFID=VF0467#VF0467
orf04352	317	VFG037414(gb|YP_001847244)	308	124/293(42.32)	2.77e-88	experimentally verified	VF0467	Acinetobactin	Acinetobacter baumannii ACICU	bauD	ferric siderophore ABC transporter, permease protein BauD	http://www.mgc.ac.cn/cgi-bin/VFs/vfs.cgi?VFID=VF0467#VF0467
orf04353	225	VFG038219(gb|YP_001845364)	238	75/231(32.47)	2.78e-28	experimentally verified	VF0463	BfmRS	Acinetobacter baumannii ACICU	bfmR	biofilm-controlling response regulator	http://www.mgc.ac.cn/cgi-bin/VFs/vfs.cgi?VFID=VF0463#VF0463
orf04354	305	VFG009810(gb|NP_215272)	485	54/255(21.18)	4.06e-16	experimentally verified	CVF331	PhoP/R	Mycobacterium tuberculosis H37Rv	phoR	Possible two component system response sensor kinase membrane associated PhoR	None
orf04355	225	VFG001206(gb|NP_273675)	352	71/202(35.15)	7.48e-32	experimentally verified	VF0272	FbpABC	Neisseria meningitidis MC58	fbpC	iron(III) ABC transporter, ATP-binding protein	http://www.mgc.ac.cn/cgi-bin/VFs/vfs.cgi?VFID=VF0272#VF0272
orf04363	635	VFG002420(gb|NP_644838)	772	57/243(23.46)	4.4e-10	experimentally verified	VF0422	AdsA	Staphylococcus aureus subsp. aureus MW2	adsA	Adenosine synthase A	http://www.mgc.ac.cn/cgi-bin/VFs/vfs.cgi?VFID=VF0422#VF0422
orf04365	282	VFG048488(gb|YP_002918371.1)	264	85/241(35.27)	4.03e-34	experimentally verified	VF0562	Ent	Klebsiella pneumoniae subsp. pneumoniae NTUH-K2044	fepC	iron-enterobactin transporter ATP-binding protein	http://www.mgc.ac.cn/cgi-bin/VFs/vfs.cgi?VFID=VF0562#VF0562
orf04368	376	VFG015994(gb|NP_251084)	427	80/398(20.10)	3.37e-09	experimentally verified	IA001	pyoverdine	Pseudomonas aeruginosa PAO1	pvdN	pyoverdine biosynthesis protein PvdN	None
orf04369	291	VFG000249(gb|NP_273676)	505	56/226(24.78)	4.61e-10	experimentally verified	VF0272	FbpABC	Neisseria meningitidis MC58	fbpB	iron(III) ABC transporter, permease protein	http://www.mgc.ac.cn/cgi-bin/VFs/vfs.cgi?VFID=VF0272#VF0272
orf04370	277	VFG000249(gb|NP_273676)	505	55/203(27.09)	8.23e-13	experimentally verified	VF0272	FbpABC	Neisseria meningitidis MC58	fbpB	iron(III) ABC transporter, permease protein	http://www.mgc.ac.cn/cgi-bin/VFs/vfs.cgi?VFID=VF0272#VF0272
orf04384	137	VFG043204(gb|YP_855930)	162	28/135(20.74)	1.14e-09	experimentally verified	AI144	ND	Aeromonas hydrophila subsp. hydrophila ATCC 7966	cheW-2	chemotaxis protein CheW	None
orf04390	365	VFG000173(gb|NP_252907)	402	55/239(23.01)	8.57e-06	experimentally verified	VF0100	Pyocyanin	Pseudomonas aeruginosa PAO1	phzS	flavin dependent hydroxylase PhzS	http://www.mgc.ac.cn/cgi-bin/VFs/vfs.cgi?VFID=VF0100#VF0100
orf04396	177	VFG042390(gb|YP_540132)	183	29/108(26.85)	2.69e-10	experimentally verified	VF0222	S fimbriae	Escherichia coli UTI89	sfaX	regulatory protein SfaX	http://www.mgc.ac.cn/cgi-bin/VFs/vfs.cgi?VFID=VF0222#VF0222
orf04405	405	VFG000155(gb|NP_252168)	426	85/381(22.31)	6.9e-09	experimentally verified	VF0089	Rhamnolipid	Pseudomonas aeruginosa PAO1	rhlB	rhamnosyltransferase chain B	http://www.mgc.ac.cn/cgi-bin/VFs/vfs.cgi?VFID=VF0089#VF0089
orf04408	279	VFG001234(gb|NP_249107)	264	59/251(23.51)	6.02e-08	experimentally verified	VF0082	Type IV pili	Pseudomonas aeruginosa PAO1	chpD	probable transcriptional regulator	http://www.mgc.ac.cn/cgi-bin/VFs/vfs.cgi?VFID=VF0082#VF0082
orf04411	1036	VFG037720(gb|YP_001847164)	1059	248/1039(23.87)	4.49e-66	experimentally verified	VF0504	AdeFGH efflux pump	Acinetobacter baumannii ACICU	adeG	cation/multidrug efflux pump	http://www.mgc.ac.cn/cgi-bin/VFs/vfs.cgi?VFID=VF0504#VF0504
orf04412	473	VFG036974(gb|NP_274719)	412	45/194(23.20)	8.87e-09	experimentally verified	VF0451	MtrCDE	Neisseria meningitidis MC58	mtrC	membrane fusion protein MtrC	http://www.mgc.ac.cn/cgi-bin/VFs/vfs.cgi?VFID=VF0451#VF0451
orf04413	216	VFG002440(gb|YP_111528)	223	54/195(27.69)	4.59e-20	experimentally verified	VF0428	Bsa T3SS	Burkholderia pseudomallei K96243	bprB	two-component response regulator	http://www.mgc.ac.cn/cgi-bin/VFs/vfs.cgi?VFID=VF0428#VF0428
orf04417	399	VFG000155(gb|NP_252168)	426	86/404(21.29)	3.8e-09	experimentally verified	VF0089	Rhamnolipid	Pseudomonas aeruginosa PAO1	rhlB	rhamnosyltransferase chain B	http://www.mgc.ac.cn/cgi-bin/VFs/vfs.cgi?VFID=VF0089#VF0089
orf04422	325	VFG002197(gb|NP_814691)	336	95/336(28.27)	9.01e-27	experimentally verified	VF0362	BopD	Enterococcus faecalis V583	bopD	sugar-binding transcriptional regulator, LacI family	http://www.mgc.ac.cn/cgi-bin/VFs/vfs.cgi?VFID=VF0362#VF0362
orf04425	230	VFG033025(gb|NP_463944)	466	70/198(35.35)	6.08e-28	experimentally verified	VF0442	PgdA	Listeria monocytogenes EGD-e	pdgA	Peptidoglycan N-deacetylase	http://www.mgc.ac.cn/cgi-bin/VFs/vfs.cgi?VFID=VF0442#VF0442
orf04429	226	VFG038219(gb|YP_001845364)	238	87/220(39.55)	8.21e-49	experimentally verified	VF0463	BfmRS	Acinetobacter baumannii ACICU	bfmR	biofilm-controlling response regulator	http://www.mgc.ac.cn/cgi-bin/VFs/vfs.cgi?VFID=VF0463#VF0463
orf04430	367	VFG009810(gb|NP_215272)	485	79/280(28.21)	5.68e-25	experimentally verified	CVF331	PhoP/R	Mycobacterium tuberculosis H37Rv	phoR	Possible two component system response sensor kinase membrane associated PhoR	None
orf04439	5778	VFG016041(gb|NP_251092)	5149	1675/5274(31.76)	0	experimentally verified	IA001	pyoverdine	Pseudomonas aeruginosa PAO1	pvdI	peptide synthase	None
orf04440	577	VFG013248(gb|NP_438233)	587	175/529(33.08)	8.5e-75	experimentally verified	CVF494	LOS	Haemophilus influenzae Rd KW20	msbA	lipid transporter ATP-binding/permease	None
orf04441	608	VFG013248(gb|NP_438233)	587	175/494(35.43)	1.18e-84	experimentally verified	CVF494	LOS	Haemophilus influenzae Rd KW20	msbA	lipid transporter ATP-binding/permease	None
orf04442	1102	VFG000161(gb|NP_251089)	2448	381/1000(38.10)	6.47e-185	experimentally verified	VF0094	Pyoverdine	Pseudomonas aeruginosa PAO1	pvdD	pyoverdine synthetase D	http://www.mgc.ac.cn/cgi-bin/VFs/vfs.cgi?VFID=VF0094#VF0094
orf04443	4993	VFG016041(gb|NP_251092)	5149	1698/5006(33.92)	0	experimentally verified	IA001	pyoverdine	Pseudomonas aeruginosa PAO1	pvdI	peptide synthase	None
orf04446	313	VFG002548(gb|YP_109384)	2546	58/200(29.00)	1.7e-16	experimentally verified	VF0436	Capsule I	Burkholderia pseudomallei K96243	wcbR	capsular polysaccharide biosynthesis fatty acid synthase	http://www.mgc.ac.cn/cgi-bin/VFs/vfs.cgi?VFID=VF0436#VF0436
orf04448	610	VFG047111(gb|YP_170393.1)	628	57/204(27.94)	5.36e-08	experimentally verified	VF0542	LPS	Francisella tularensis subsp. tularensis SCHU S4	wbtH	asparagine synthase (glutamine-hydrolyzing)	http://www.mgc.ac.cn/cgi-bin/VFs/vfs.cgi?VFID=VF0542#VF0542
orf04449	446	VFG014893(gb|NP_254009)	463	133/447(29.75)	1.24e-39	experimentally verified	CVF522	Alginate biosynthesis	Pseudomonas aeruginosa PAO1	algC	phosphomannomutase AlgC	None
orf04453	188	VFG000121(gb|NP_249453)	193	67/183(36.61)	3.07e-33	experimentally verified	VF0091	Alginate	Pseudomonas aeruginosa PAO1	algU	alginate biosynthesis protein AlgZ/FimS	http://www.mgc.ac.cn/cgi-bin/VFs/vfs.cgi?VFID=VF0091#VF0091
orf04460	259	VFG033025(gb|NP_463944)	466	75/210(35.71)	1.94e-28	experimentally verified	VF0442	PgdA	Listeria monocytogenes EGD-e	pdgA	Peptidoglycan N-deacetylase	http://www.mgc.ac.cn/cgi-bin/VFs/vfs.cgi?VFID=VF0442#VF0442
orf04462	368	VFG001265(gb|NP_250145)	280	54/179(30.17)	8.71e-13	experimentally verified	VF0273	Flagella	Pseudomonas aeruginosa PAO1	fleN	flagellar synthesis regulator FleN	http://www.mgc.ac.cn/cgi-bin/VFs/vfs.cgi?VFID=VF0273#VF0273
orf04502	396	VFG046465(gb|YP_169203.1)	394	287/394(72.84)	6.54e-220	experimentally verified	VF0460	EF-Tu	Francisella tularensis subsp. tularensis SCHU S4	tufA	elongation factor Tu	http://www.mgc.ac.cn/cgi-bin/VFs/vfs.cgi?VFID=VF0460#VF0460
orf04503	692	VFG046465(gb|YP_169203.1)	394	45/148(30.41)	7.46e-12	experimentally verified	VF0460	EF-Tu	Francisella tularensis subsp. tularensis SCHU S4	tufA	elongation factor Tu	http://www.mgc.ac.cn/cgi-bin/VFs/vfs.cgi?VFID=VF0460#VF0460
orf04522	226	VFG048896(gb|YP_002920359.1)	170	39/122(31.97)	3.59e-07	experimentally verified	VF0560	Capsule	Klebsiella pneumoniae subsp. pneumoniae NTUH-K2044	wcsT	galactoside O-acetyltransferase	http://www.mgc.ac.cn/cgi-bin/VFs/vfs.cgi?VFID=VF0560#VF0560
orf04525	232	VFG000700(gb|AAP42192)	474	81/230(35.22)	4.76e-34	experimentally verified	VF0043	Capsule	Haemophilus influenzae str. 1007	bsc1	bifunctional; ribulose 5-phosphate reductase; CDP-ribitol pyrophosphorylase	http://www.mgc.ac.cn/cgi-bin/VFs/vfs.cgi?VFID=VF0043#VF0043
orf04530	814	VFG000079(gb|NP_463763)	820	621/815(76.20)	0	experimentally verified	VF0072	ClpC	Listeria monocytogenes EGD-e	clpC	endopeptidase Clp ATP-binding chain C	http://www.mgc.ac.cn/cgi-bin/VFs/vfs.cgi?VFID=VF0072#VF0072
orf04540	466	VFG048841(gb|YP_002920354.1)	467	133/336(39.58)	2.57e-72	experimentally verified	VF0560	Capsule	Klebsiella pneumoniae subsp. pneumoniae NTUH-K2044	wcaJ	undecaprenyl-phosphate glucose phosphotransferase	http://www.mgc.ac.cn/cgi-bin/VFs/vfs.cgi?VFID=VF0560#VF0560
orf04541	302	VFG047055(gb|YP_170389.1)	286	35/130(26.92)	2.19e-10	experimentally verified	VF0542	LPS	Francisella tularensis subsp. tularensis SCHU S4	wbtK	glycosyltransferase	http://www.mgc.ac.cn/cgi-bin/VFs/vfs.cgi?VFID=VF0542#VF0542
orf04542	303	VFG013471(gb|NP_439724)	323	51/216(23.61)	5e-09	experimentally verified	CVF494	LOS	Haemophilus influenzae Rd KW20	lgtA	N-acetylglucosamine glycosyltransferase	None
orf04543	290	VFG002557(gb|YP_109393)	280	51/203(25.12)	2.33e-11	experimentally verified	VF0436	Capsule I	Burkholderia pseudomallei K96243	wcbJ	capsular polysaccharide biosynthesis protein	http://www.mgc.ac.cn/cgi-bin/VFs/vfs.cgi?VFID=VF0436#VF0436
orf04544	339	VFG047022(gb|YP_170387.1)	348	171/327(52.29)	8.79e-118	experimentally verified	VF0542	LPS	Francisella tularensis subsp. tularensis SCHU S4	wbtM	dTDP-D-glucose 4,6-dehydratase	http://www.mgc.ac.cn/cgi-bin/VFs/vfs.cgi?VFID=VF0542#VF0542
orf04545	181	VFG002375(gb|YP_001007267)	174	62/167(37.13)	4.97e-40	experimentally verified	VF0392	O-antigen	Yersinia enterocolitica subsp. enterocolitica 8081	wbcA	sugar epimerase	http://www.mgc.ac.cn/cgi-bin/VFs/vfs.cgi?VFID=VF0392#VF0392
orf04548	242	VFG047039(gb|YP_170388.1)	294	102/245(41.63)	5.74e-64	experimentally verified	VF0542	LPS	Francisella tularensis subsp. tularensis SCHU S4	wbtL	glucose-1-phosphate thymidylyltransferase	http://www.mgc.ac.cn/cgi-bin/VFs/vfs.cgi?VFID=VF0542#VF0542
orf04550	1280	VFG002186(gb|NP_816137)	836	126/521(24.18)	2.51e-22	experimentally verified	VF0361	Capsule	Enterococcus faecalis V583	cpsE	glycosyl transferase, group 2 family protein	http://www.mgc.ac.cn/cgi-bin/VFs/vfs.cgi?VFID=VF0361#VF0361
orf04551	137	VFG000331(gb|NP_439675)	476	36/131(27.48)	1.86e-09	experimentally verified	VF0044	LOS	Haemophilus influenzae Rd KW20	rfaE	ADP-heptose synthase	http://www.mgc.ac.cn/cgi-bin/VFs/vfs.cgi?VFID=VF0044#VF0044
orf04552	512	VFG047111(gb|YP_170393.1)	628	164/574(28.57)	1.43e-51	experimentally verified	VF0542	LPS	Francisella tularensis subsp. tularensis SCHU S4	wbtH	asparagine synthase (glutamine-hydrolyzing)	http://www.mgc.ac.cn/cgi-bin/VFs/vfs.cgi?VFID=VF0542#VF0542
orf04553	435	VFG049084(gb|YP_002920347.1)	246	106/238(44.54)	4.95e-72	experimentally verified	VF0561	LPS	Klebsiella pneumoniae subsp. pneumoniae NTUH-K2044	wzt	lipopolysaccharide O-antigen ABC transport system ATP-binding component	http://www.mgc.ac.cn/cgi-bin/VFs/vfs.cgi?VFID=VF0561#VF0561
orf04554	232	VFG002180(gb|NP_816131)	270	67/235(28.51)	2.39e-28	experimentally verified	VF0361	Capsule	Enterococcus faecalis V583	cpsK	ABC transporter, permease protein	http://www.mgc.ac.cn/cgi-bin/VFs/vfs.cgi?VFID=VF0361#VF0361
orf04559	293	VFG050186(gb|AJI07989.1)	295	185/286(64.69)	4.62e-132	experimentally verified	CVF891	B. cereus exo-polysaccharide (BPS)	Bacillus cereus G9241	bpsC	UTP--glucose-1-phosphate uridylyltransferase	None
orf04560	343	VFG000670(gb|NP_706258)	309	124/309(40.13)	1.19e-62	experimentally verified	VF0124	LPS	Shigella flexneri 2a str. 301	gtrB	bactoprenol glucosyl transferase	http://www.mgc.ac.cn/cgi-bin/VFs/vfs.cgi?VFID=VF0124#VF0124
orf04566	410	VFG014950(gb|NP_249457)	474	95/252(37.70)	2.62e-39	experimentally verified	CVF523	Alginate regulation	Pseudomonas aeruginosa PAO1	mucD	serine protease MucD precursor	None
orf04569	953	VFG013248(gb|NP_438233)	587	65/287(22.65)	1.12e-06	experimentally verified	CVF494	LOS	Haemophilus influenzae Rd KW20	msbA	lipid transporter ATP-binding/permease	None
orf04571	275	VFG014707(gb|NP_250151)	246	109/245(44.49)	3.38e-63	experimentally verified	AI138	Deoxyhexose linking sugar, 209 Da capping structure	Pseudomonas aeruginosa PAO1	motC	flagellar motor protein	None
orf04572	271	VFG014720(gb|NP_250152)	296	87/268(32.46)	5.19e-37	experimentally verified	AI138	Deoxyhexose linking sugar, 209 Da capping structure	Pseudomonas aeruginosa PAO1	motD	flagellar motor protein	None
orf04579	191	VFG000121(gb|NP_249453)	193	52/170(30.59)	2.26e-16	experimentally verified	VF0091	Alginate	Pseudomonas aeruginosa PAO1	algU	alginate biosynthesis protein AlgZ/FimS	http://www.mgc.ac.cn/cgi-bin/VFs/vfs.cgi?VFID=VF0091#VF0091
orf04591	228	VFG001206(gb|NP_273675)	352	68/210(32.38)	5.47e-34	experimentally verified	VF0272	FbpABC	Neisseria meningitidis MC58	fbpC	iron(III) ABC transporter, ATP-binding protein	http://www.mgc.ac.cn/cgi-bin/VFs/vfs.cgi?VFID=VF0272#VF0272
orf04593	384	VFG016355(gb|NP_831113)	760	35/131(26.72)	1.83e-07	experimentally verified	VF0585	IlsA	Bacillus cereus ATCC 14579	ilsA	InternalinNEAT domain-containing leucine-rich repeat protein	http://www.mgc.ac.cn/cgi-bin/VFs/vfs.cgi?VFID=VF0585#VF0585
orf04594	260	VFG001419(gb|NP_218321)	338	71/256(27.73)	1.5e-12	experimentally verified	VF0311	Antigen 85	Mycobacterium tuberculosis H37Rv	fbpA	Secreted antigen 85-a FbpA (mycolyl transferase 85A) (fibronectin-binding protein A) (antigen 85 complex A)	http://www.mgc.ac.cn/cgi-bin/VFs/vfs.cgi?VFID=VF0311#VF0311
orf04598	335	VFG046903(gb|YP_169492.1)	318	112/305(36.72)	8.23e-60	experimentally verified	VF0542	LPS	Francisella tularensis subsp. tularensis SCHU S4	flmF2	glycosyl transferase family protein	http://www.mgc.ac.cn/cgi-bin/VFs/vfs.cgi?VFID=VF0542#VF0542
orf04603	318	VFG047690(gb|YP_170572.1)	306	84/313(26.84)	2.29e-24	experimentally verified	VF0558	Pyrimidine biosynthesis	Francisella tularensis subsp. tularensis SCHU S4	pyrB	aspartate carbamoyltransferase	http://www.mgc.ac.cn/cgi-bin/VFs/vfs.cgi?VFID=VF0558#VF0558
orf04604	420	VFG016046(gb|NP_251103)	469	128/429(29.84)	6.63e-48	experimentally verified	IA001	pyoverdine	Pseudomonas aeruginosa PAO1	pvdH	diaminobutyrate-2-oxoglutarate aminotransferase PvdH	None
orf04609	295	VFG039623(gb|NP_820769)	288	103/275(37.45)	1.02e-60	experimentally verified	CVF803	T4SS effectors	Coxiella burnetii RSA 493	CBU_1789	Coxiella Dot/Icm type IVB secretion system translocated effector	None
orf04618	384	VFG002226(gb|NP_540331)	380	107/377(28.38)	2.73e-44	experimentally verified	VF0367	LPS	Brucella melitensis bv. 1 str. 16M	per	perosamine synthetase	http://www.mgc.ac.cn/cgi-bin/VFs/vfs.cgi?VFID=VF0367#VF0367
orf04626	381	VFG002226(gb|NP_540331)	380	114/370(30.81)	1.65e-62	experimentally verified	VF0367	LPS	Brucella melitensis bv. 1 str. 16M	per	perosamine synthetase	http://www.mgc.ac.cn/cgi-bin/VFs/vfs.cgi?VFID=VF0367#VF0367
orf04627	212	VFG050167(gb|YP_002392939.1)	207	30/103(29.13)	1.29e-07	experimentally verified	VF0239	K1 capsule	Escherichia coli O45:K1:H7 str. S88	neuD	NeuD protein involved in sialic acid synthesis	http://www.mgc.ac.cn/cgi-bin/VFs/vfs.cgi?VFID=VF0239#VF0239
orf04628	379	VFG050183(gb|AJI08022.1)	381	135/379(35.62)	7.34e-78	experimentally verified	CVF891	B. cereus exo-polysaccharide (BPS)	Bacillus cereus G9241	bpsF	UDP-N-acetyl-D-glucosamine 2-epimerase, UDP-hydrolysing	None
orf04629	342	VFG001338(gb|NP_688170)	341	152/328(46.34)	4.98e-106	experimentally verified	VF0274	Capsule	Streptococcus agalactiae 2603V/R	neuB	N-acetyl neuramic acid synthetase NeuB	http://www.mgc.ac.cn/cgi-bin/VFs/vfs.cgi?VFID=VF0274#VF0274
orf04630	239	VFG050182(gb|AJI08113.1)	235	97/217(44.70)	6.34e-54	experimentally verified	CVF891	B. cereus exo-polysaccharide (BPS)	Bacillus cereus G9241	bpsG	acylneuraminate cytidylyltransferase family protein	None
orf04631	339	VFG001301(gb|NP_644943)	342	136/292(46.58)	1.59e-82	experimentally verified	VF0003	Capsule	Staphylococcus aureus subsp. aureus MW2	cap8E	capsular polysaccharide synthesis enzyme Cap8E	http://www.mgc.ac.cn/cgi-bin/VFs/vfs.cgi?VFID=VF0003#VF0003
orf04632	578	VFG012036(gb|NP_282483)	628	99/410(24.15)	1.26e-15	experimentally verified	AI151	Pse5Ac7Ac, Pse5Ac7Am, Pse8OAc, Pse5Am7AcGlnAc	Campylobacter jejuni subsp. jejuni NCTC 11168	pseE/maf5	motility accessory factor PseE	None
orf04634	127	VFG038746(gb|YP_856238)	140	26/105(24.76)	9.39e-07	experimentally verified	AI144	ND	Aeromonas hydrophila subsp. hydrophila ATCC 7966	flaJ	flagellar specific chaperone FlaJ/FliS	None
orf04635	490	VFG002002(gb|YP_095367)	541	83/388(21.39)	1.42e-07	experimentally verified	VF0157	Flagella	Legionella pneumophila subsp. pneumophila str. Philadelphia 1	fliD	flagellar capping protein FliD	http://www.mgc.ac.cn/cgi-bin/VFs/vfs.cgi?VFID=VF0157#VF0157
orf04636	125	VFG014304(gb|NP_249784)	123	13/73(17.81)	3.68e-06	experimentally verified	AI138	Deoxyhexose linking sugar, 209 Da capping structure	Pseudomonas aeruginosa PAO1	fleI/flag	flagellar protein FlaG	None
orf04637	257	VFG038734(gb|YP_856235)	301	121/298(40.60)	1.18e-54	experimentally verified	AI144	ND	Aeromonas hydrophila subsp. hydrophila ATCC 7966	flaB	flagellin	None
orf04639	148	VFG043401(gb|YP_002344468)	129	25/106(23.58)	8.31e-11	experimentally verified	AI151	Pse5Ac7Ac, Pse5Ac7Am, Pse8OAc, Pse5Am7AcGlnAc	Campylobacter jejuni subsp. jejuni NCTC 11168	fliW	flagellar assembly protein FliW	None
orf04640	291	VFG001245(gb|NP_249778)	439	55/189(29.10)	2.71e-17	experimentally verified	VF0273	Flagella	Pseudomonas aeruginosa PAO1	flgL	flagellar hook-associated protein 3 FlgL	http://www.mgc.ac.cn/cgi-bin/VFs/vfs.cgi?VFID=VF0273#VF0273
orf04641	526	VFG002342(gb|YP_001006755)	554	140/566(24.73)	9.99e-27	experimentally verified	VF0394	Flagella	Yersinia enterocolitica subsp. enterocolitica 8081	flgK	flagellar hook-associated protein 1 FlgK	http://www.mgc.ac.cn/cgi-bin/VFs/vfs.cgi?VFID=VF0394#VF0394
orf04650	240	VFG002440(gb|YP_111528)	223	63/227(27.75)	3.33e-26	experimentally verified	VF0428	Bsa T3SS	Burkholderia pseudomallei K96243	bprB	two-component response regulator	http://www.mgc.ac.cn/cgi-bin/VFs/vfs.cgi?VFID=VF0428#VF0428
orf04653	469	VFG036974(gb|NP_274719)	412	47/194(24.23)	2.13e-09	experimentally verified	VF0451	MtrCDE	Neisseria meningitidis MC58	mtrC	membrane fusion protein MtrC	http://www.mgc.ac.cn/cgi-bin/VFs/vfs.cgi?VFID=VF0451#VF0451
orf04654	1038	VFG037720(gb|YP_001847164)	1059	248/1050(23.62)	2.08e-64	experimentally verified	VF0504	AdeFGH efflux pump	Acinetobacter baumannii ACICU	adeG	cation/multidrug efflux pump	http://www.mgc.ac.cn/cgi-bin/VFs/vfs.cgi?VFID=VF0504#VF0504
orf04655	300	VFG001284(gb|NP_647402)	186	40/132(30.30)	2.96e-07	experimentally verified	VF0014	Intercellular adhesion proteins	Staphylococcus aureus subsp. aureus MW2	icaR	ica operon transcriptional regulator IcaR	http://www.mgc.ac.cn/cgi-bin/VFs/vfs.cgi?VFID=VF0014#VF0014
orf04661	448	VFG036974(gb|NP_274719)	412	58/197(29.44)	1.48e-09	experimentally verified	VF0451	MtrCDE	Neisseria meningitidis MC58	mtrC	membrane fusion protein MtrC	http://www.mgc.ac.cn/cgi-bin/VFs/vfs.cgi?VFID=VF0451#VF0451
orf04662	1045	VFG036992(gb|NP_274718)	1067	280/1062(26.37)	1.61e-87	experimentally verified	VF0451	MtrCDE	Neisseria meningitidis MC58	mtrD	multiple transferable resistance system protein MtrD	http://www.mgc.ac.cn/cgi-bin/VFs/vfs.cgi?VFID=VF0451#VF0451
orf04664	376	VFG013508(gb|NP_439858)	355	85/318(26.73)	4.54e-18	experimentally verified	CVF494	LOS	Haemophilus influenzae Rd KW20	wecA	undecaprenyl-phosphate alpha-N-acetylglucosaminyltransferase	None
orf04669	572	VFG013327(gb|NP_438900)	550	214/571(37.48)	1.34e-98	experimentally verified	CVF494	LOS	Haemophilus influenzae Rd KW20	yhxB/manB	phosphomannomutase	None
orf04670	148	VFG011399(gb|NP_539749)	173	61/139(43.88)	3.95e-38	experimentally verified	CVF383	LPS	Brucella melitensis bv. 1 str. 16M	fabZ	(3R)-hydroxymyristoyl ACP dehydratase	None
orf04674	275	VFG001913(gb|NP_281870)	263	92/276(33.33)	8.94e-39	experimentally verified	VF0114	Flagella	Campylobacter jejuni subsp. jejuni NCTC 11168	flgG	flagellar basal-body rod protein FlgG	http://www.mgc.ac.cn/cgi-bin/VFs/vfs.cgi?VFID=VF0114#VF0114
orf04675	294	VFG002513(gb|YP_106902)	262	85/299(28.43)	4.86e-26	experimentally verified	VF0430	Flagella	Burkholderia pseudomallei K96243	flgG	flagellar basal body rod protein FlgG	http://www.mgc.ac.cn/cgi-bin/VFs/vfs.cgi?VFID=VF0430#VF0430
orf04686	466	VFG007158(gb|NP_798047)	440	109/358(30.45)	3.88e-49	experimentally verified	VF0408	T3SS1	Vibrio parahaemolyticus RIMD 2210633	vscN	type III secretion system ATPase VscN	http://www.mgc.ac.cn/cgi-bin/VFs/vfs.cgi?VFID=VF0408#VF0408
orf04688	504	VFG000192(gb|NP_250388)	440	108/351(30.77)	1.12e-45	experimentally verified	VF0083	TTSS	Pseudomonas aeruginosa PAO1	pscN	type III secretion system ATPase PscN	http://www.mgc.ac.cn/cgi-bin/VFs/vfs.cgi?VFID=VF0083#VF0083
orf04695	388	VFG001373(gb|NP_344890)	365	207/360(57.50)	3.11e-152	experimentally verified	VF0144	Capsule	Streptococcus pneumoniae TIGR4	cps4I	UDP-N-acetylglucosamine-2-epimerase	http://www.mgc.ac.cn/cgi-bin/VFs/vfs.cgi?VFID=VF0144#VF0144
orf04717	503	VFG037203(gb|YP_001847849)	541	98/417(23.50)	2.8e-22	experimentally verified	VF0469	Phospholipase D	Acinetobacter baumannii ACICU	plcD	phosphatidylserine/phosphatidylglycerophosphate/cardiolipin synthase	http://www.mgc.ac.cn/cgi-bin/VFs/vfs.cgi?VFID=VF0469#VF0469
orf04727	1205	VFG016355(gb|NP_831113)	760	44/156(28.21)	1.57e-10	experimentally verified	VF0585	IlsA	Bacillus cereus ATCC 14579	ilsA	InternalinNEAT domain-containing leucine-rich repeat protein	http://www.mgc.ac.cn/cgi-bin/VFs/vfs.cgi?VFID=VF0585#VF0585
orf04728	607	VFG038853(gb|YP_858604)	431	105/440(23.86)	3.34e-15	experimentally verified	CVF786	Polar flagella	Aeromonas hydrophila subsp. hydrophila ATCC 7966	maf-2	Maf-2	None
orf04734	164	VFG039386(gb|NP_819821)	145	28/93(30.11)	1.56e-07	experimentally verified	SS051	Dot/Icm	Coxiella burnetii RSA 493	coxH2	Coxiella Dot/Icm type IVB secretion system translocated effector	None
orf04741	297	VFG000925(gb|NP_752606)	271	123/266(46.24)	3.3e-83	experimentally verified	VF0228	Enterobactin	Escherichia coli CFT073	fepC	ferrienterobactin ABC transporter ATPase	http://www.mgc.ac.cn/cgi-bin/VFs/vfs.cgi?VFID=VF0228#VF0228
orf04744	337	VFG050189(gb|AJI07938.1)	304	81/268(30.22)	4.59e-36	experimentally verified	CVF891	B. cereus exo-polysaccharide (BPS)	Bacillus cereus G9241	bpsX	LytR family transcriptional regulator	None
orf04763	291	VFG001983(gb|NP_282073)	259	63/207(30.43)	8.36e-25	experimentally verified	VF0327	PEB1	Campylobacter jejuni subsp. jejuni NCTC 11168	pebA	bifunctional adhesin/ABC transporter aspartate/glutamate-binding protein	http://www.mgc.ac.cn/cgi-bin/VFs/vfs.cgi?VFID=VF0327#VF0327
orf04764	251	VFG000344(gb|NP_438273)	351	82/237(34.60)	4.77e-47	experimentally verified	VF0268	HitABC	Haemophilus influenzae Rd KW20	hitC	iron(III) ABC transporter, ATP-binding protein	http://www.mgc.ac.cn/cgi-bin/VFs/vfs.cgi?VFID=VF0268#VF0268
orf04792	285	VFG049114(gb|YP_002918199.1)	307	71/280(25.36)	5.13e-10	experimentally verified	VF0572	Allantion utilization	Klebsiella pneumoniae subsp. pneumoniae NTUH-K2044	allS	DNA-binding transcriptional activator AllS	http://www.mgc.ac.cn/cgi-bin/VFs/vfs.cgi?VFID=VF0572#VF0572
orf04795	646	VFG000104(gb|NP_230488)	626	147/611(24.06)	4.73e-24	experimentally verified	VF0127	ACF	Vibrio cholerae O1 biovar El Tor str. N16961	acfB	accessory colonization factor AcfB, methyl-accepting chemoreceptor	http://www.mgc.ac.cn/cgi-bin/VFs/vfs.cgi?VFID=VF0127#VF0127
orf04799	279	VFG001386(gb|NP_215271)	247	41/123(33.33)	1.27e-14	experimentally verified	VF0286	PhoP	Mycobacterium tuberculosis H37Rv	phoP	Possible two component system response transcriptional positive regulator PhoP	http://www.mgc.ac.cn/cgi-bin/VFs/vfs.cgi?VFID=VF0286#VF0286
orf04805	363	VFG045467(gb|YP_107884)	580	50/180(27.78)	7.08e-11	experimentally verified	VF0432	CdpA	Burkholderia pseudomallei K96243	cdpA	cyclic di-GMP phosphodiesterase	http://www.mgc.ac.cn/cgi-bin/VFs/vfs.cgi?VFID=VF0432#VF0432
orf04817	239	VFG038839(gb|YP_858598)	249	64/191(33.51)	1.87e-28	experimentally verified	CVF786	Polar flagella	Aeromonas hydrophila subsp. hydrophila ATCC 7966	flmH	short chain dehydrogenase/reductase family oxidoreductase	None
orf04823	158	VFG000307(gb|NP_207041)	144	45/129(34.88)	4.42e-22	experimentally verified	VF0052	HP-NAP	Helicobacter pylori 26695	napA	neutrophil activating protein NapA	http://www.mgc.ac.cn/cgi-bin/VFs/vfs.cgi?VFID=VF0052#VF0052
orf04825	352	VFG000344(gb|NP_438273)	351	113/323(34.98)	2.19e-56	experimentally verified	VF0268	HitABC	Haemophilus influenzae Rd KW20	hitC	iron(III) ABC transporter, ATP-binding protein	http://www.mgc.ac.cn/cgi-bin/VFs/vfs.cgi?VFID=VF0268#VF0268
orf04826	262	VFG000249(gb|NP_273676)	505	46/176(26.14)	1.27e-11	experimentally verified	VF0272	FbpABC	Neisseria meningitidis MC58	fbpB	iron(III) ABC transporter, permease protein	http://www.mgc.ac.cn/cgi-bin/VFs/vfs.cgi?VFID=VF0272#VF0272
orf04848	169	VFG001713(gb|NP_755457)	183	22/99(22.22)	2.4e-06	experimentally verified	CVF425	P fimbriae	Escherichia coli CFT073	papX	PapX protein regulates flagellum synthesis to repress motility	None
orf04850	358	VFG045467(gb|YP_107884)	580	47/177(26.55)	6.45e-09	experimentally verified	VF0432	CdpA	Burkholderia pseudomallei K96243	cdpA	cyclic di-GMP phosphodiesterase	http://www.mgc.ac.cn/cgi-bin/VFs/vfs.cgi?VFID=VF0432#VF0432
orf04852	307	VFG049114(gb|YP_002918199.1)	307	67/282(23.76)	1.48e-13	experimentally verified	VF0572	Allantion utilization	Klebsiella pneumoniae subsp. pneumoniae NTUH-K2044	allS	DNA-binding transcriptional activator AllS	http://www.mgc.ac.cn/cgi-bin/VFs/vfs.cgi?VFID=VF0572#VF0572
orf04859	317	VFG047546(gb|YP_169934.1)	306	65/231(28.14)	1.13e-23	experimentally verified	VF0552	Biotin synthesis	Francisella tularensis subsp. tularensis SCHU S4	bioJ	lipase/esterase	http://www.mgc.ac.cn/cgi-bin/VFs/vfs.cgi?VFID=VF0552#VF0552
orf04867	361	VFG001386(gb|NP_215271)	247	22/66(33.33)	2.21e-06	experimentally verified	VF0286	PhoP	Mycobacterium tuberculosis H37Rv	phoP	Possible two component system response transcriptional positive regulator PhoP	http://www.mgc.ac.cn/cgi-bin/VFs/vfs.cgi?VFID=VF0286#VF0286
orf04870	258	VFG005767(gb|NP_687682)	240	81/242(33.47)	1.28e-41	experimentally verified	CVF171	Beta-hemolysin/cytolysin	Streptococcus agalactiae 2603V/R	cylG	3-ketoacyl-ACP-reductase CylG	None
orf04874	337	VFG002197(gb|NP_814691)	336	80/317(25.24)	1.61e-22	experimentally verified	VF0362	BopD	Enterococcus faecalis V583	bopD	sugar-binding transcriptional regulator, LacI family	http://www.mgc.ac.cn/cgi-bin/VFs/vfs.cgi?VFID=VF0362#VF0362
orf04875	469	VFG049159(gb|YP_006635485.1)	479	88/443(19.86)	3.76e-07	experimentally verified	VF0573	Colibactin	Klebsiella pneumoniae subsp. pneumoniae 1084	clbM	precolibactin export MATE transporter ClbM	http://www.mgc.ac.cn/cgi-bin/VFs/vfs.cgi?VFID=VF0573#VF0573
orf04876	335	VFG049148(gb|YP_006635474.1)	2970	72/288(25.00)	6.09e-13	experimentally verified	VF0573	Colibactin	Klebsiella pneumoniae subsp. pneumoniae 1084	clbB	colibactin hybrid non-ribosomal peptide synthetase/type I polyketide synthase ClbB	http://www.mgc.ac.cn/cgi-bin/VFs/vfs.cgi?VFID=VF0573#VF0573
orf04877	186	VFG000121(gb|NP_249453)	193	45/173(26.01)	2.75e-11	experimentally verified	VF0091	Alginate	Pseudomonas aeruginosa PAO1	algU	alginate biosynthesis protein AlgZ/FimS	http://www.mgc.ac.cn/cgi-bin/VFs/vfs.cgi?VFID=VF0091#VF0091
orf04883	625	VFG013248(gb|NP_438233)	587	91/239(38.08)	8.47e-45	experimentally verified	CVF494	LOS	Haemophilus influenzae Rd KW20	msbA	lipid transporter ATP-binding/permease	None
orf04887	242	VFG050113(gb|YP_002336033.1)	291	66/216(30.56)	6.87e-34	experimentally verified	VF0583	Cereulide	Bacillus cereus AH187	cesC	ABC transporter ATP-binding protein, CesC	http://www.mgc.ac.cn/cgi-bin/VFs/vfs.cgi?VFID=VF0583#VF0583
orf04889	694	VFG002176(gb|AAM75252)	714	72/228(31.58)	7.24e-17	experimentally verified	VF0356	Cytolysin	Enterococcus faecalis str. MMH594	cylB	ABC-type transporter	http://www.mgc.ac.cn/cgi-bin/VFs/vfs.cgi?VFID=VF0356#VF0356
orf04899	390	VFG002197(gb|NP_814691)	336	92/337(27.30)	1.97e-37	experimentally verified	VF0362	BopD	Enterococcus faecalis V583	bopD	sugar-binding transcriptional regulator, LacI family	http://www.mgc.ac.cn/cgi-bin/VFs/vfs.cgi?VFID=VF0362#VF0362
orf04914	278	VFG043378(gb|NP_207394)	433	50/135(37.04)	3.11e-13	experimentally verified	AI150	Pse5Ac7Ac	Helicobacter pylori 26695	cheV3	chemotaxis coupling protein CheV3	None
orf04917	185	VFG050157(gb|YP_002392929.1)	339	44/173(25.43)	1.58e-06	experimentally verified	VF0239	K1 capsule	Escherichia coli O45:K1:H7 str. S88	kpsF	Polysialic acid capsule expression protein	http://www.mgc.ac.cn/cgi-bin/VFs/vfs.cgi?VFID=VF0239#VF0239
orf04924	588	VFG000120(gb|NP_253949)	358	54/181(29.83)	2.68e-15	experimentally verified	VF0091	Alginate	Pseudomonas aeruginosa PAO1	algZ	sigma factor AlgU	http://www.mgc.ac.cn/cgi-bin/VFs/vfs.cgi?VFID=VF0091#VF0091
orf04925	543	VFG000119(gb|NP_253948)	248	45/119(37.82)	4.86e-16	experimentally verified	VF0091	Alginate	Pseudomonas aeruginosa PAO1	algR	alginate biosynthesis regulatory protein AlgR	http://www.mgc.ac.cn/cgi-bin/VFs/vfs.cgi?VFID=VF0091#VF0091
orf04934	212	VFG000921(gb|NP_756178)	207	64/191(33.51)	3.1e-13	experimentally verified	VF0227	Chu	Escherichia coli CFT073	chuY	ChuY	http://www.mgc.ac.cn/cgi-bin/VFs/vfs.cgi?VFID=VF0227#VF0227
orf04936	246	VFG001206(gb|NP_273675)	352	75/246(30.49)	7.19e-27	experimentally verified	VF0272	FbpABC	Neisseria meningitidis MC58	fbpC	iron(III) ABC transporter, ATP-binding protein	http://www.mgc.ac.cn/cgi-bin/VFs/vfs.cgi?VFID=VF0272#VF0272
orf04939	300	VFG000421(gb|NP_395427.1)	307	34/104(32.69)	2.26e-11	experimentally verified	VF0138	F1 antigen	Yersinia pestis CO92	caf1R	F1 operon positive regulatory protein	http://www.mgc.ac.cn/cgi-bin/VFs/vfs.cgi?VFID=VF0138#VF0138
orf04943	235	VFG038839(gb|YP_858598)	249	61/249(24.50)	1.09e-08	experimentally verified	CVF786	Polar flagella	Aeromonas hydrophila subsp. hydrophila ATCC 7966	flmH	short chain dehydrogenase/reductase family oxidoreductase	None
orf04944	314	VFG007177(gb|NP_798078)	286	57/248(22.98)	6.18e-09	experimentally verified	VF0408	T3SS1	Vibrio parahaemolyticus RIMD 2210633	exsA	transcriptional regulator ExsA	http://www.mgc.ac.cn/cgi-bin/VFs/vfs.cgi?VFID=VF0408#VF0408
orf04952	308	VFG050113(gb|YP_002336033.1)	291	87/226(38.50)	1.9e-40	experimentally verified	VF0583	Cereulide	Bacillus cereus AH187	cesC	ABC transporter ATP-binding protein, CesC	http://www.mgc.ac.cn/cgi-bin/VFs/vfs.cgi?VFID=VF0583#VF0583
orf04955	548	VFG000119(gb|NP_253948)	248	42/119(35.29)	4.89e-13	experimentally verified	VF0091	Alginate	Pseudomonas aeruginosa PAO1	algR	alginate biosynthesis regulatory protein AlgR	http://www.mgc.ac.cn/cgi-bin/VFs/vfs.cgi?VFID=VF0091#VF0091
orf04956	617	VFG000120(gb|NP_253949)	358	62/226(27.43)	2.95e-12	experimentally verified	VF0091	Alginate	Pseudomonas aeruginosa PAO1	algZ	sigma factor AlgU	http://www.mgc.ac.cn/cgi-bin/VFs/vfs.cgi?VFID=VF0091#VF0091
orf04960	206	VFG042972(gb|YP_002742499)	183	39/133(29.32)	1.71e-10	experimentally verified	VF0530	PI-2	Streptococcus pneumoniae Taiwan19F-14	sipA	signal peptidase I	http://www.mgc.ac.cn/cgi-bin/VFs/vfs.cgi?VFID=VF0530#VF0530
orf04964	318	VFG033025(gb|NP_463944)	466	72/222(32.43)	2.43e-20	experimentally verified	VF0442	PgdA	Listeria monocytogenes EGD-e	pdgA	Peptidoglycan N-deacetylase	http://www.mgc.ac.cn/cgi-bin/VFs/vfs.cgi?VFID=VF0442#VF0442
orf04965	684	VFG032992(gb|NP_464816)	622	282/643(43.86)	8.44e-183	experimentally verified	VF0441	OatA	Listeria monocytogenes EGD-e	oatA	peptidoglycan O-acetyltransferase	http://www.mgc.ac.cn/cgi-bin/VFs/vfs.cgi?VFID=VF0441#VF0441
orf04986	315	VFG000038(gb|NP_878995)	350	44/194(22.68)	6.04e-08	experimentally verified	VF0033	LPS	Bordetella pertussis Tohama I	bplA	probable oxidoreductase	http://www.mgc.ac.cn/cgi-bin/VFs/vfs.cgi?VFID=VF0033#VF0033
orf04988	265	VFG001234(gb|NP_249107)	264	43/149(28.86)	4.93e-09	experimentally verified	VF0082	Type IV pili	Pseudomonas aeruginosa PAO1	chpD	probable transcriptional regulator	http://www.mgc.ac.cn/cgi-bin/VFs/vfs.cgi?VFID=VF0082#VF0082
orf04989	325	VFG037372(gb|YP_001847241)	322	71/283(25.09)	1.17e-12	experimentally verified	VF0467	Acinetobactin	Acinetobacter baumannii ACICU	bauB	ferric siderophore ABC transporter, periplasmic siderophore-binding protein	http://www.mgc.ac.cn/cgi-bin/VFs/vfs.cgi?VFID=VF0467#VF0467
orf04990	340	VFG000926(gb|NP_752608)	338	120/317(37.85)	2.93e-48	experimentally verified	VF0228	Enterobactin	Escherichia coli CFT073	fepD	ferrienterobactin ABC transporter permease	http://www.mgc.ac.cn/cgi-bin/VFs/vfs.cgi?VFID=VF0228#VF0228
orf04991	327	VFG000928(gb|NP_752607)	330	116/312(37.18)	8.69e-53	experimentally verified	VF0228	Enterobactin	Escherichia coli CFT073	fepG	iron-enterobactin ABC transporter permease	http://www.mgc.ac.cn/cgi-bin/VFs/vfs.cgi?VFID=VF0228#VF0228
orf04993	252	VFG000344(gb|NP_438273)	351	80/244(32.79)	3.64e-36	experimentally verified	VF0268	HitABC	Haemophilus influenzae Rd KW20	hitC	iron(III) ABC transporter, ATP-binding protein	http://www.mgc.ac.cn/cgi-bin/VFs/vfs.cgi?VFID=VF0268#VF0268
orf04996	269	VFG001206(gb|NP_273675)	352	75/215(34.88)	1.82e-30	experimentally verified	VF0272	FbpABC	Neisseria meningitidis MC58	fbpC	iron(III) ABC transporter, ATP-binding protein	http://www.mgc.ac.cn/cgi-bin/VFs/vfs.cgi?VFID=VF0272#VF0272
orf04997	273	VFG000907(gb|NP_755448)	707	63/245(25.71)	4.46e-18	experimentally verified	VF0225	<alpha>-Hemolysin	Escherichia coli CFT073	hlyB	Hemolysin B	http://www.mgc.ac.cn/cgi-bin/VFs/vfs.cgi?VFID=VF0225#VF0225
orf05001	259	VFG000344(gb|NP_438273)	351	73/221(33.03)	2.69e-29	experimentally verified	VF0268	HitABC	Haemophilus influenzae Rd KW20	hitC	iron(III) ABC transporter, ATP-binding protein	http://www.mgc.ac.cn/cgi-bin/VFs/vfs.cgi?VFID=VF0268#VF0268
orf05002	305	VFG001206(gb|NP_273675)	352	73/285(25.61)	1.73e-14	experimentally verified	VF0272	FbpABC	Neisseria meningitidis MC58	fbpC	iron(III) ABC transporter, ATP-binding protein	http://www.mgc.ac.cn/cgi-bin/VFs/vfs.cgi?VFID=VF0272#VF0272
orf05018	245	VFG038219(gb|YP_001845364)	238	37/103(35.92)	2.77e-12	experimentally verified	VF0463	BfmRS	Acinetobacter baumannii ACICU	bfmR	biofilm-controlling response regulator	http://www.mgc.ac.cn/cgi-bin/VFs/vfs.cgi?VFID=VF0463#VF0463
orf05019	528	VFG043373(gb|NP_207190)	803	48/168(28.57)	3.21e-13	experimentally verified	AI150	Pse5Ac7Ac	Helicobacter pylori 26695	cheA	histidine kinase CheA	None
orf05025	270	VFG000421(gb|NP_395427.1)	307	25/83(30.12)	2.77e-08	experimentally verified	VF0138	F1 antigen	Yersinia pestis CO92	caf1R	F1 operon positive regulatory protein	http://www.mgc.ac.cn/cgi-bin/VFs/vfs.cgi?VFID=VF0138#VF0138
orf05026	295	VFG044083(gb|NP_250948)	312	59/265(22.26)	1.82e-13	experimentally verified	IA001	pyoverdine	Pseudomonas aeruginosa PAO1	ptxR	transcriptional regulator PtxR	None
orf05027	246	VFG005767(gb|NP_687682)	240	78/244(31.97)	3.92e-32	experimentally verified	CVF171	Beta-hemolysin/cytolysin	Streptococcus agalactiae 2603V/R	cylG	3-ketoacyl-ACP-reductase CylG	None
orf05031	246	VFG005767(gb|NP_687682)	240	76/245(31.02)	4.01e-36	experimentally verified	CVF171	Beta-hemolysin/cytolysin	Streptococcus agalactiae 2603V/R	cylG	3-ketoacyl-ACP-reductase CylG	None
orf05048	394	VFG039454(gb|NP_820212)	497	44/163(26.99)	1.28e-08	experimentally verified	SS051	Dot/Icm	Coxiella burnetii RSA 493	coxU2	Coxiella Dot/Icm type IVB secretion system translocated effector	None
orf05050	231	VFG038219(gb|YP_001845364)	238	71/232(30.60)	2.66e-31	experimentally verified	VF0463	BfmRS	Acinetobacter baumannii ACICU	bfmR	biofilm-controlling response regulator	http://www.mgc.ac.cn/cgi-bin/VFs/vfs.cgi?VFID=VF0463#VF0463
orf05051	314	VFG038759(gb|YP_857329)	344	64/266(24.06)	4.5e-14	experimentally verified	AI144	ND	Aeromonas hydrophila subsp. hydrophila ATCC 7966	fleS/flrB	two-component sensor kinase	None
orf05052	253	VFG005776(gb|NP_687685)	309	71/212(33.49)	2.11e-37	experimentally verified	CVF171	Beta-hemolysin/cytolysin	Streptococcus agalactiae 2603V/R	cylA	ABC (ATP-binding cassette) transporter CylA	None
orf05069	304	VFG002189(gb|NP_816140)	266	37/128(28.91)	3.01e-08	experimentally verified	VF0361	Capsule	Enterococcus faecalis V583	cpsB	phosphatidate cytidylyltransferase	http://www.mgc.ac.cn/cgi-bin/VFs/vfs.cgi?VFID=VF0361#VF0361
orf05085	312	VFG001415(gb|NP_218004)	277	70/240(29.17)	1.88e-16	experimentally verified	VF0307	LipF	Mycobacterium tuberculosis H37Rv	lipF	Probable esterase/lipase LipF	http://www.mgc.ac.cn/cgi-bin/VFs/vfs.cgi?VFID=VF0307#VF0307
orf05087	193	VFG001284(gb|NP_647402)	186	25/90(27.78)	2.35e-08	experimentally verified	VF0014	Intercellular adhesion proteins	Staphylococcus aureus subsp. aureus MW2	icaR	ica operon transcriptional regulator IcaR	http://www.mgc.ac.cn/cgi-bin/VFs/vfs.cgi?VFID=VF0014#VF0014
orf05092	196	VFG000121(gb|NP_249453)	193	43/179(24.02)	2.56e-13	experimentally verified	VF0091	Alginate	Pseudomonas aeruginosa PAO1	algU	alginate biosynthesis protein AlgZ/FimS	http://www.mgc.ac.cn/cgi-bin/VFs/vfs.cgi?VFID=VF0091#VF0091
orf05095	236	VFG038839(gb|YP_858598)	249	74/226(32.74)	2.19e-20	experimentally verified	CVF786	Polar flagella	Aeromonas hydrophila subsp. hydrophila ATCC 7966	flmH	short chain dehydrogenase/reductase family oxidoreductase	None
orf05096	192	VFG001284(gb|NP_647402)	186	27/107(25.23)	6.35e-06	experimentally verified	VF0014	Intercellular adhesion proteins	Staphylococcus aureus subsp. aureus MW2	icaR	ica operon transcriptional regulator IcaR	http://www.mgc.ac.cn/cgi-bin/VFs/vfs.cgi?VFID=VF0014#VF0014
orf05099	520	VFG000121(gb|NP_249453)	193	41/181(22.65)	5.67e-09	experimentally verified	VF0091	Alginate	Pseudomonas aeruginosa PAO1	algU	alginate biosynthesis protein AlgZ/FimS	http://www.mgc.ac.cn/cgi-bin/VFs/vfs.cgi?VFID=VF0091#VF0091
orf05106	473	VFG036956(gb|NP_273368)	508	131/497(26.36)	7.29e-39	experimentally verified	VF0450	FarAB	Neisseria meningitidis MC58	farB	fatty acid efflux system protein FarB	http://www.mgc.ac.cn/cgi-bin/VFs/vfs.cgi?VFID=VF0450#VF0450
orf05114	654	VFG046465(gb|YP_169203.1)	394	55/193(28.50)	1.16e-10	experimentally verified	VF0460	EF-Tu	Francisella tularensis subsp. tularensis SCHU S4	tufA	elongation factor Tu	http://www.mgc.ac.cn/cgi-bin/VFs/vfs.cgi?VFID=VF0460#VF0460
orf05144	411	VFG014950(gb|NP_249457)	474	113/300(37.67)	1.49e-51	experimentally verified	CVF523	Alginate regulation	Pseudomonas aeruginosa PAO1	mucD	serine protease MucD precursor	None
orf05149	609	VFG009810(gb|NP_215272)	485	95/261(36.40)	2.76e-39	experimentally verified	CVF331	PhoP/R	Mycobacterium tuberculosis H37Rv	phoR	Possible two component system response sensor kinase membrane associated PhoR	None
orf05150	243	VFG038219(gb|YP_001845364)	238	99/229(43.23)	4.25e-59	experimentally verified	VF0463	BfmRS	Acinetobacter baumannii ACICU	bfmR	biofilm-controlling response regulator	http://www.mgc.ac.cn/cgi-bin/VFs/vfs.cgi?VFID=VF0463#VF0463
orf05160	364	VFG050189(gb|AJI07938.1)	304	88/304(28.95)	4.29e-29	experimentally verified	CVF891	B. cereus exo-polysaccharide (BPS)	Bacillus cereus G9241	bpsX	LytR family transcriptional regulator	None
orf05162	321	VFG000344(gb|NP_438273)	351	70/254(27.56)	3.77e-26	experimentally verified	VF0268	HitABC	Haemophilus influenzae Rd KW20	hitC	iron(III) ABC transporter, ATP-binding protein	http://www.mgc.ac.cn/cgi-bin/VFs/vfs.cgi?VFID=VF0268#VF0268
orf05163	327	VFG001206(gb|NP_273675)	352	75/235(31.91)	7.05e-24	experimentally verified	VF0272	FbpABC	Neisseria meningitidis MC58	fbpC	iron(III) ABC transporter, ATP-binding protein	http://www.mgc.ac.cn/cgi-bin/VFs/vfs.cgi?VFID=VF0272#VF0272
orf05177	253	VFG038722(gb|YP_855928)	264	84/241(34.85)	1.34e-42	experimentally verified	CVF786	Polar flagella	Aeromonas hydrophila subsp. hydrophila ATCC 7966	AHA_1389	CobQ/CobB/MinD/ParA family protein	None
